# Supplementary material for: An Approach for Identifying Cytokines Based on a Novel Ensemble Classifier
Source: Biomed Res Int. 2013 Aug 21;2013:686090. doi: 10.1155/2013/686090 (PMC3763580; doi:10.1155/2013/686090)
Supplement: Supplementary file 1 — The supplementary material contains three files. The first file (4151.fasta) is the candidate sequences which were predicted by our method from UniProt. It contains 4151 sequences. The second file (16245.fasta) is all the cytokine sequences which is collected by us. The third file (blast.xlsx) is the blast result. 4151.fasta is chosen as the query file, and 16245.fasta is chosen as the database file. The blast.xlsx showed the similarity between the candidates predicted by our method and the known cytokines. [file 686090.f1.zip]

Archive with 4 entries (3 files):
- 686090.f1/
- 686090.f1/16245.fasta
- 686090.f1/4151.fasta
- 686090.f1/blast.xlsx
