# Supplementary material for: An Approach for Identifying Cytokines Based on a Novel Ensemble Classifier
Source: Biomed Res Int. 2013 Aug 21;2013:686090. doi: 10.1155/2013/686090 (PMC3763580; doi:10.1155/2013/686090)
Supplement: Supplementary file 1 — The supplementary material contains three files. The first file (4151.fasta) is the candidate sequences which were predicted by our method from UniProt. It contains 4151 sequences. The second file (16245.fasta) is all the cytokine sequences which is collected by us. The third file (blast.xlsx) is the blast result. 4151.fasta is chosen as the query file, and 16245.fasta is chosen as the database file. The blast.xlsx showed the similarity between the candidates predicted by our method and the known cytokines. [file 686090.f1.zip › 686090.f1/blast.xlsx]

## Sheet: blastout
query seq	query len	known seq	known len	query start	query end	known start	known end	Evalue	match len	match len/query len
sp|Q9UBX5|FBLN5_HUMAN	448	tr|B4DZY7|B4DZY7_HUMAN	542	186	314	2	124	8e-20	131	0.292411
sp|A0A1F4|EYS_DROME	2176	tr|F6SWZ6|F6SWZ6_MACMU	688	1543	1826	87	436	0.002	366	0.168199
sp|A0A1F4|EYS_DROME	2176	tr|F7FYE9|F7FYE9_ORNAN	593	1548	1869	34	383	5e-09	361	0.165901
sp|A0A1F4|EYS_DROME	2176	tr|B4DZY7|B4DZY7_HUMAN	542	1566	1869	3	331	8e-07	354	0.162684
sp|A0A1F4|EYS_DROME	2176	tr|G1LCY3|G1LCY3_AILME	674	1543	1826	116	423	0.0005	342	0.157169
sp|A0A1F4|EYS_DROME	2176	tr|G1K8T5|G1K8T5_ANOCA	591	1548	1850	34	363	8e-07	342	0.157169
sp|A0A1F4|EYS_DROME	2176	tr|H0V9V5|H0V9V5_CAVPO	676	1543	1849	117	434	0.008	341	0.15671
sp|A0A1F4|EYS_DROME	2176	tr|H0XUI2|H0XUI2_OTOGA	675	1548	1826	116	423	0.003	338	0.155331
sp|A0A1F4|EYS_DROME	2176	sp|Q14393|GAS6_HUMAN	721	1548	1869	200	510	0.1	337	0.154871
sp|A0A1F4|EYS_DROME	2176	sp|Q63772|GAS6_RAT	674	1543	1845	116	426	0.0001	336	0.154412
sp|A0A1F4|EYS_DROME	2176	sp|Q00918|LTBP1_RAT	1712	129	403	933	1263	1e-08	336	0.154412
sp|A0A1F4|EYS_DROME	2176	tr|G1P9P1|G1P9P1_MYOLU	670	1543	1826	110	417	0.002	335	0.153952
sp|A0A1F4|EYS_DROME	2176	tr|F1MZ40|F1MZ40_BOVIN	682	1548	1826	125	432	0.0006	331	0.152114
sp|A0A1F4|EYS_DROME	2176	sp|Q61592|GAS6_MOUSE	674	1548	1826	116	423	0.0001	327	0.150276
sp|A0A1F4|EYS_DROME	2176	sp|O08999|LTBP2_MOUSE	1813	148	405	882	1196	9e-08	323	0.148438
sp|A0A1F4|EYS_DROME	2176	sp|Q9NS15|LTBP3_HUMAN	1303	153	442	836	1140	0.0004	323	0.148438
sp|A0A1F4|EYS_DROME	2176	sp|Q00918|LTBP1_RAT	1712	148	407	869	1184	6e-08	322	0.147978
sp|A0A1F4|EYS_DROME	2176	tr|G3I7Z5|G3I7Z5_CRIGR	684	1543	1826	153	460	2e-05	321	0.147518
sp|A0A1F4|EYS_DROME	2176	tr|F1P3F0|F1P3F0_CHICK	591	1548	1826	34	341	3e-07	316	0.145221
sp|A0A1F4|EYS_DROME	2176	sp|Q14766|LTBP1_HUMAN	1721	153	403	967	1271	2e-10	315	0.144761
sp|A0A1F4|EYS_DROME	2176	sp|Q8CG19|LTBP1_MOUSE	1712	153	403	959	1263	5e-09	310	0.142463
sp|A0A1F4|EYS_DROME	2176	sp|O35806|LTBP2_RAT	1764	150	373	1215	1512	0.13	305	0.140165
sp|A0A1F4|EYS_DROME	2176	tr|G3TKE9|G3TKE9_LOXAF	672	1543	1814	114	405	3e-06	305	0.140165
sp|A0A1F4|EYS_DROME	2176	tr|H0ZGC4|H0ZGC4_TAEGU	666	1542	1814	112	404	6e-07	304	0.139706
sp|A0A1F4|EYS_DROME	2176	sp|Q14767|LTBP2_HUMAN	1821	148	413	891	1175	2e-11	294	0.13511
sp|A0A1F4|EYS_DROME	2176	sp|Q9NS15|LTBP3_HUMAN	1303	151	413	583	865	2e-11	294	0.13511
sp|A0A1F4|EYS_DROME	2176	sp|O08999|LTBP2_MOUSE	1813	153	403	1052	1322	5e-06	287	0.131893
sp|A0A1F4|EYS_DROME	2176	sp|Q61810|LTBP3_MOUSE	1268	148	359	616	893	3e-09	284	0.130515
sp|A0A1F4|EYS_DROME	2176	sp|Q9NS15|LTBP3_HUMAN	1303	148	364	620	894	4e-08	283	0.130055
sp|A0A1F4|EYS_DROME	2176	sp|Q61810|LTBP3_MOUSE	1268	151	404	579	848	3e-10	281	0.129136
sp|A0A1F4|EYS_DROME	2176	sp|O35806|LTBP2_RAT	1764	146	401	839	1107	4e-14	279	0.128217
sp|A0A1F4|EYS_DROME	2176	sp|O35806|LTBP2_RAT	1764	153	403	1051	1318	6e-09	279	0.128217
sp|A0A1F4|EYS_DROME	2176	sp|O08999|LTBP2_MOUSE	1813	146	401	840	1108	6e-14	279	0.128217
sp|A0A1F4|EYS_DROME	2176	sp|Q14766|LTBP1_HUMAN	1721	151	403	1046	1313	1e-13	277	0.127298
sp|A0A1F4|EYS_DROME	2176	sp|Q8CG19|LTBP1_MOUSE	1712	153	403	1040	1305	4e-15	275	0.126379
sp|A0A1F4|EYS_DROME	2176	sp|Q14767|LTBP2_HUMAN	1821	150	401	853	1117	1e-12	274	0.125919
sp|A0A1F4|EYS_DROME	2176	sp|Q28019|LTBP2_BOVIN	1842	156	389	1182	1385	0.004	257	0.118107
sp|A0A1F4|EYS_DROME	2176	sp|O08999|LTBP2_MOUSE	1813	165	385	1148	1381	3e-06	250	0.11489
sp|A0A1F4|EYS_DROME	2176	sp|Q14766|LTBP1_HUMAN	1721	181	403	872	1105	4e-05	249	0.11443
sp|A0A1F4|EYS_DROME	2176	sp|Q14767|LTBP2_HUMAN	1821	195	402	859	1076	1e-08	237	0.108915
sp|A0A1F4|EYS_DROME	2176	sp|O35806|LTBP2_RAT	1764	195	402	849	1066	7e-10	234	0.107537
sp|A0A1F4|EYS_DROME	2176	sp|O08999|LTBP2_MOUSE	1813	195	402	850	1067	3e-09	233	0.107077
sp|A0A1F4|EYS_DROME	2176	sp|Q28019|LTBP2_BOVIN	1842	153	330	1053	1240	2e-05	197	0.0905331
sp|A0A1F4|EYS_DROME	2176	tr|G1NPQ8|G1NPQ8_MELGA	691	184	357	89	258	1e-09	189	0.0868566
sp|A0A1F4|EYS_DROME	2176	tr|H0ZGC4|H0ZGC4_TAEGU	666	184	354	112	278	1e-10	187	0.0859375
sp|A0A1F4|EYS_DROME	2176	tr|F1P3F0|F1P3F0_CHICK	591	184	354	33	199	9e-10	186	0.0854779
sp|A0A1F4|EYS_DROME	2176	tr|F7FYE9|F7FYE9_ORNAN	593	177	344	25	195	9e-11	185	0.0850184
sp|A0A1F4|EYS_DROME	2176	tr|G1LCY3|G1LCY3_AILME	674	177	344	107	276	4e-10	185	0.0850184
sp|A0A1F4|EYS_DROME	2176	tr|G1P9P1|G1P9P1_MYOLU	670	177	344	101	270	2e-09	182	0.0836397
sp|A0A1F4|EYS_DROME	2176	tr|G3TKE9|G3TKE9_LOXAF	672	177	344	105	274	2e-10	179	0.082261
sp|A0A1F4|EYS_DROME	2176	tr|H0V9V5|H0V9V5_CAVPO	676	184	344	116	278	5e-12	178	0.0818015
sp|A0A1F4|EYS_DROME	2176	tr|F6SWZ6|F6SWZ6_MACMU	688	215	382	78	247	4e-11	178	0.0818015
sp|A0A1F4|EYS_DROME	2176	sp|Q14393|GAS6_HUMAN	721	215	382	110	279	4e-11	178	0.0818015
sp|A0A1F4|EYS_DROME	2176	tr|G1K8T5|G1K8T5_ANOCA	591	184	344	33	195	9e-10	178	0.0818015
sp|A0A1F4|EYS_DROME	2176	sp|P30431|VM3JA_BOTJA	571	176	330	302	469	1.3	178	0.0818015
sp|A0A1F4|EYS_DROME	2176	tr|G3I7Z5|G3I7Z5_CRIGR	684	184	344	152	313	2e-09	177	0.0813419
sp|A0A1F4|EYS_DROME	2176	sp|Q61592|GAS6_MOUSE	674	184	344	115	276	5e-10	177	0.0813419
sp|A0A1F4|EYS_DROME	2176	sp|Q63772|GAS6_RAT	674	184	344	115	276	3e-09	177	0.0813419
sp|A0A1F4|EYS_DROME	2176	tr|H0XUI2|H0XUI2_OTOGA	675	184	344	115	276	9e-09	177	0.0813419
sp|A0A1F4|EYS_DROME	2176	tr|F1MZ40|F1MZ40_BOVIN	682	184	344	124	285	2e-10	176	0.0808824
sp|A0A1F4|EYS_DROME	2176	tr|F6SWZ6|F6SWZ6_MACMU	688	184	342	86	245	7e-09	175	0.0804228
sp|A0A1F4|EYS_DROME	2176	sp|Q14393|GAS6_HUMAN	721	184	342	118	277	6e-09	175	0.0804228
sp|A0A1F4|EYS_DROME	2176	tr|F7BMF8|F7BMF8_MONDO	723	184	342	118	277	5e-12	174	0.0799632
sp|A0A1F4|EYS_DROME	2176	sp|Q14767|LTBP2_HUMAN	1821	142	293	1085	1249	9e-06	173	0.0795037
sp|A0A1F4|EYS_DROME	2176	tr|F6SWZ6|F6SWZ6_MACMU	688	148	304	88	245	5e-06	170	0.078125
sp|A0A1F4|EYS_DROME	2176	tr|G1LCY3|G1LCY3_AILME	674	148	304	117	274	4e-07	170	0.078125
sp|A0A1F4|EYS_DROME	2176	sp|Q63661|MUC4_RAT	2344	109	257	1928	2087	4	168	0.0772059
sp|A0A1F4|EYS_DROME	2176	tr|G3TKE9|G3TKE9_LOXAF	672	148	304	115	272	5e-06	167	0.0767463
sp|A0A1F4|EYS_DROME	2176	tr|G1P9P1|G1P9P1_MYOLU	670	148	304	111	268	5e-07	166	0.0762868
sp|A0A1F4|EYS_DROME	2176	tr|F1P3F0|F1P3F0_CHICK	591	160	309	49	198	6e-07	161	0.073989
sp|A0A1F4|EYS_DROME	2176	sp|O35806|LTBP2_RAT	1764	274	419	849	994	0.074	160	0.0735294
sp|A0A1F4|EYS_DROME	2176	sp|O08999|LTBP2_MOUSE	1813	274	419	850	995	0.064	160	0.0735294
sp|A0A1F4|EYS_DROME	2176	tr|G1K8T5|G1K8T5_ANOCA	591	157	304	46	193	3e-06	159	0.0730699
sp|A0A1F4|EYS_DROME	2176	tr|G1NPQ8|G1NPQ8_MELGA	691	160	307	105	251	2e-07	158	0.0726103
sp|A0A1F4|EYS_DROME	2176	tr|H0ZGC4|H0ZGC4_TAEGU	666	162	309	130	277	2e-07	155	0.0712316
sp|A0A1F4|EYS_DROME	2176	tr|F7BMF8|F7BMF8_MONDO	723	162	304	136	277	9e-06	154	0.0707721
sp|A0A1F4|EYS_DROME	2176	tr|G3I7Z5|G3I7Z5_CRIGR	684	148	288	154	296	5e-08	154	0.0707721
sp|A0A1F4|EYS_DROME	2176	tr|F7FYE9|F7FYE9_ORNAN	593	162	304	51	193	4e-06	154	0.0707721
sp|A0A1F4|EYS_DROME	2176	sp|Q61592|GAS6_MOUSE	674	148	288	117	259	5e-08	154	0.0707721
sp|A0A1F4|EYS_DROME	2176	sp|Q63772|GAS6_RAT	674	148	288	117	259	4e-07	154	0.0707721
sp|A0A1F4|EYS_DROME	2176	tr|H0XUI2|H0XUI2_OTOGA	675	148	288	117	259	2e-06	154	0.0707721
sp|A0A1F4|EYS_DROME	2176	sp|Q00918|LTBP1_RAT	1712	150	288	1161	1305	0.0002	152	0.0698529
sp|A0A1F4|EYS_DROME	2176	tr|B4DZY7|B4DZY7_HUMAN	542	165	304	3	141	1e-05	150	0.0689338
sp|A0A1F4|EYS_DROME	2176	sp|Q14767|LTBP2_HUMAN	1821	269	395	847	983	0.02	147	0.0675551
sp|A0A1F4|EYS_DROME	2176	tr|G1NPQ8|G1NPQ8_MELGA	691	1548	1682	90	229	0.017	142	0.0652574
sp|A0A1F4|EYS_DROME	2176	tr|F1MZ40|F1MZ40_BOVIN	682	157	288	138	268	1e-05	138	0.0634191
sp|A0A1F4|EYS_DROME	2176	sp|Q61810|LTBP3_MOUSE	1268	274	405	584	685	0.059	137	0.0629596
sp|A0A1F4|EYS_DROME	2176	tr|F1MZ40|F1MZ40_BOVIN	682	284	403	146	268	1e-06	133	0.0611213
sp|A0A1F4|EYS_DROME	2176	tr|H0V9V5|H0V9V5_CAVPO	676	284	403	138	261	6e-09	131	0.0602022
sp|A0A1F4|EYS_DROME	2176	tr|F7BMF8|F7BMF8_MONDO	723	284	403	140	262	2e-07	130	0.0597426
sp|A0A1F4|EYS_DROME	2176	tr|G3I7Z5|G3I7Z5_CRIGR	684	284	403	174	296	2e-11	130	0.0597426
sp|A0A1F4|EYS_DROME	2176	tr|F6SWZ6|F6SWZ6_MACMU	688	284	403	108	230	2e-09	130	0.0597426
sp|A0A1F4|EYS_DROME	2176	sp|Q14393|GAS6_HUMAN	721	284	403	140	262	3e-09	130	0.0597426
sp|A0A1F4|EYS_DROME	2176	tr|F7FYE9|F7FYE9_ORNAN	593	284	403	55	178	2e-08	130	0.0597426
sp|A0A1F4|EYS_DROME	2176	tr|G1LCY3|G1LCY3_AILME	674	284	403	137	259	7e-09	130	0.0597426
sp|A0A1F4|EYS_DROME	2176	sp|Q61592|GAS6_MOUSE	674	284	403	137	259	1e-08	130	0.0597426
sp|A0A1F4|EYS_DROME	2176	tr|G1P9P1|G1P9P1_MYOLU	670	284	403	131	253	6e-10	130	0.0597426
sp|A0A1F4|EYS_DROME	2176	sp|Q63772|GAS6_RAT	674	284	403	137	259	2e-08	130	0.0597426
sp|A0A1F4|EYS_DROME	2176	tr|B4DZY7|B4DZY7_HUMAN	542	284	403	4	126	4e-09	130	0.0597426
sp|A0A1F4|EYS_DROME	2176	tr|H0XUI2|H0XUI2_OTOGA	675	284	403	137	259	9e-08	130	0.0597426
sp|A0A1F4|EYS_DROME	2176	tr|G3TKE9|G3TKE9_LOXAF	672	284	403	135	257	5e-09	127	0.058364
sp|A0A1F4|EYS_DROME	2176	sp|Q14114|LRP8_HUMAN	963	131	250	250	366	0.059	127	0.058364
sp|A0A1F4|EYS_DROME	2176	tr|H0V9V5|H0V9V5_CAVPO	676	302	403	116	222	0.042	109	0.0500919
sp|A0A1F4|EYS_DROME	2176	sp|Q63772|GAS6_RAT	674	302	403	115	220	0.22	109	0.0500919
sp|A0A1F4|EYS_DROME	2176	tr|F7BMF8|F7BMF8_MONDO	723	302	403	118	223	0.003	108	0.0496324
sp|A0A1F4|EYS_DROME	2176	tr|G3I7Z5|G3I7Z5_CRIGR	684	302	403	152	257	0.24	108	0.0496324
sp|A0A1F4|EYS_DROME	2176	tr|F7FYE9|F7FYE9_ORNAN	593	302	403	33	139	0.0002	108	0.0496324
sp|A0A1F4|EYS_DROME	2176	tr|G3TKE9|G3TKE9_LOXAF	672	302	403	113	218	0.001	108	0.0496324
sp|A0A1F4|EYS_DROME	2176	sp|Q61592|GAS6_MOUSE	674	302	403	115	220	0.12	108	0.0496324
sp|A0A1F4|EYS_DROME	2176	tr|G1K8T5|G1K8T5_ANOCA	591	302	403	33	139	0.0005	108	0.0496324
sp|A0A1F4|EYS_DROME	2176	tr|H0XUI2|H0XUI2_OTOGA	675	302	403	115	220	0.83	108	0.0496324
sp|A0A1F4|EYS_DROME	2176	tr|H0ZGC4|H0ZGC4_TAEGU	666	302	403	112	217	0.0001	107	0.0491728
sp|A0A1F4|EYS_DROME	2176	tr|F1MZ40|F1MZ40_BOVIN	682	302	403	124	229	0.14	107	0.0491728
sp|A0A1F4|EYS_DROME	2176	tr|F1P3F0|F1P3F0_CHICK	591	302	403	33	138	0.0005	107	0.0491728
sp|A0A1F4|EYS_DROME	2176	tr|G1NPQ8|G1NPQ8_MELGA	691	302	403	89	194	0.0003	107	0.0491728
sp|A0A1F4|EYS_DROME	2176	tr|F7FYE9|F7FYE9_ORNAN	593	165	263	92	194	0.038	106	0.0487132
sp|A0A1F4|EYS_DROME	2176	tr|B4DZY7|B4DZY7_HUMAN	542	165	263	41	142	0.0004	106	0.0487132
sp|A0A1F4|EYS_DROME	2176	sp|Q63661|MUC4_RAT	2344	285	373	1988	2085	0.1	99	0.0454963
sp|A0A1F4|EYS_DROME	2176	sp|Q90876|IRF1_CHICK	313	548	645	222	313	3.6	98	0.0450368
sp|A0A1F4|EYS_DROME	2176	sp|Q61810|LTBP3_MOUSE	1268	1270	1350	771	864	3	96	0.0441176
sp|A0A1F4|EYS_DROME	2176	tr|G1LCY3|G1LCY3_AILME	674	302	392	115	204	0.004	93	0.042739
sp|A0A1F4|EYS_DROME	2176	tr|G1P9P1|G1P9P1_MYOLU	670	302	392	109	198	0.004	93	0.042739
sp|A0A1F4|EYS_DROME	2176	tr|G1K8T5|G1K8T5_ANOCA	591	284	358	55	142	2e-07	91	0.0418199
sp|A0A1F4|EYS_DROME	2176	sp|P55107|BMP3B_HUMAN	478	508	593	251	337	0.048	88	0.0404412
sp|A0A1F4|EYS_DROME	2176	sp|Q14114|LRP8_HUMAN	963	287	368	323	405	0.054	87	0.0399816
sp|A0A1F4|EYS_DROME	2176	sp|Q14393|GAS6_HUMAN	721	1543	1623	119	198	0.002	85	0.0390625
sp|A0A1F4|EYS_DROME	2176	sp|Q8CG19|LTBP1_MOUSE	1712	1550	1623	1118	1195	0.073	83	0.0381434
sp|A0A1F4|EYS_DROME	2176	sp|Q14766|LTBP1_HUMAN	1721	1550	1623	1126	1203	0.072	83	0.0381434
sp|A0A1F4|EYS_DROME	2176	sp|Q00918|LTBP1_RAT	1712	1550	1623	1118	1195	0.017	83	0.0381434
sp|A0A1F4|EYS_DROME	2176	tr|F7BMF8|F7BMF8_MONDO	723	1548	1623	119	198	0.0004	82	0.0376838
sp|A0A1F4|EYS_DROME	2176	sp|Q28019|LTBP2_BOVIN	1842	1920	1998	390	446	2.9	79	0.0363051
sp|A0A1F4|EYS_DROME	2176	sp|Q00918|LTBP1_RAT	1712	262	331	1622	1688	1.2	78	0.0358456
sp|A0A1F4|EYS_DROME	2176	sp|Q8CG19|LTBP1_MOUSE	1712	262	330	1622	1687	1.8	77	0.035386
sp|A0A1F4|EYS_DROME	2176	sp|Q14766|LTBP1_HUMAN	1721	262	330	1631	1696	3.5	77	0.035386
sp|A0A1F4|EYS_DROME	2176	sp|Q61810|LTBP3_MOUSE	1268	153	213	831	894	2.6	69	0.0317096
sp|A0A1F4|EYS_DROME	2176	tr|B4DZY7|B4DZY7_HUMAN	542	162	224	79	141	5.2	66	0.0303309
sp|A0A1F4|EYS_DROME	2176	sp|Q28019|LTBP2_BOVIN	1842	208	261	596	655	7.8	65	0.0298713
sp|A0A1F4|EYS_DROME	2176	sp|Q00918|LTBP1_RAT	1712	1921	1981	188	252	1.1	65	0.0298713
sp|A0A1F4|EYS_DROME	2176	sp|Q28019|LTBP2_BOVIN	1842	350	408	1491	1550	8.1	63	0.0289522
sp|A0A1F4|EYS_DROME	2176	sp|Q61810|LTBP3_MOUSE	1268	195	248	1003	1059	0.83	57	0.0261949
sp|A0A1F4|EYS_DROME	2176	sp|Q05769|PGH2_MOUSE	604	128	181	1	56	1.9	56	0.0257353
sp|A0A1F4|EYS_DROME	2176	sp|Q61521|EREG_MOUSE	162	295	340	52	101	6.7	53	0.0243566
sp|A0A1F4|EYS_DROME	2176	sp|O14944|EREG_HUMAN	169	295	340	59	108	7.6	52	0.0238971
sp|A0A1F4|EYS_DROME	2176	tr|D2HBA9|D2HBA9_AILME	148	295	340	38	87	9.3	52	0.0238971
sp|A0A1F4|EYS_DROME	2176	tr|Q2VC84|Q2VC84_RAT	116	295	340	6	55	7	51	0.0234375
sp|A0A1F4|EYS_DROME	2176	tr|G3T5F8|G3T5F8_LOXAF	163	295	340	53	102	2.4	50	0.0229779
sp|A0A1F4|EYS_DROME	2176	sp|O35806|LTBP2_RAT	1764	1920	1965	389	435	0.73	47	0.0215993
sp|A0A1F4|EYS_DROME	2176	sp|O08999|LTBP2_MOUSE	1813	1920	1965	387	433	0.42	47	0.0215993
sp|A0A1F4|EYS_DROME	2176	tr|D3ZCN4|D3ZCN4_RAT	927	908	950	158	201	5.5	46	0.0211397
sp|A0A1F4|EYS_DROME	2176	sp|P98105|LYAM2_RAT	549	1539	1582	133	176	2.3	44	0.0202206
sp|A0A1F4|EYS_DROME	2176	sp|Q00690|LYAM2_MOUSE	612	1539	1582	133	176	3	44	0.0202206
sp|A0A1F4|EYS_DROME	2176	sp|Q8CG19|LTBP1_MOUSE	1712	1921	1961	188	229	0.77	42	0.0193015
sp|A0A1F4|EYS_DROME	2176	sp|Q14766|LTBP1_HUMAN	1721	1921	1961	194	235	0.72	42	0.0193015
sp|A0A1F4|EYS_DROME	2176	sp|Q14766|LTBP1_HUMAN	1721	1920	1961	405	446	3.1	42	0.0193015
sp|A0A1F4|EYS_DROME	2176	sp|Q14767|LTBP2_HUMAN	1821	1920	1960	402	443	2.9	42	0.0193015
sp|A0A1F4|EYS_DROME	2176	tr|G3T5F8|G3T5F8_LOXAF	163	140	180	63	98	3.4	41	0.0188419
sp|A0A1F4|EYS_DROME	2176	sp|P98105|LYAM2_RAT	549	224	263	143	181	0.33	40	0.0183824
sp|A0A1F4|EYS_DROME	2176	tr|G1K8T5|G1K8T5_ANOCA	591	1313	1349	35	72	7.5	39	0.0179228
sp|A0A1F4|EYS_DROME	2176	sp|Q8CG19|LTBP1_MOUSE	1712	1920	1957	397	434	7.9	38	0.0174632
sp|A0A1F4|EYS_DROME	2176	sp|Q00918|LTBP1_RAT	1712	1920	1957	397	434	7.8	38	0.0174632
sp|A0A1F4|EYS_DROME	2176	sp|P27113|LYAM2_RABIT	551	386	423	150	187	5	38	0.0174632
sp|A0A1F4|EYS_DROME	2176	sp|P16581|LYAM2_HUMAN	610	186	222	143	179	0.7	37	0.0170037
sp|A0A1F4|EYS_DROME	2176	sp|Q9QZE2|CLNK_MOUSE	435	931	967	161	194	1.8	37	0.0170037
sp|A0A1F4|EYS_DROME	2176	tr|E9PXZ8|E9PXZ8_MOUSE	435	931	967	161	194	1.8	37	0.0170037
sp|A0A1F4|EYS_DROME	2176	sp|Q05769|PGH2_MOUSE	604	302	335	19	54	1.9	36	0.0165441
sp|A0A1F4|EYS_DROME	2176	sp|P35354|PGH2_HUMAN	604	302	335	19	54	0.53	36	0.0165441
sp|A0A1F4|EYS_DROME	2176	sp|P98107|LYAM2_BOVIN	485	304	339	144	179	0.49	36	0.0165441
sp|A0A1F4|EYS_DROME	2176	sp|P16581|LYAM2_HUMAN	610	304	339	143	178	0.98	36	0.0165441
sp|A0A1F4|EYS_DROME	2176	sp|Q95LG1|LYAM2_HORSE	610	304	339	142	177	0.73	36	0.0165441
sp|A0A1F4|EYS_DROME	2176	sp|Q95LG1|LYAM2_HORSE	610	186	221	142	177	5.3	36	0.0165441
sp|A0A1F4|EYS_DROME	2176	sp|Q00690|LYAM2_MOUSE	612	304	339	143	178	0.84	36	0.0165441
sp|A0A1F4|EYS_DROME	2176	sp|Q00690|LYAM2_MOUSE	612	186	221	143	178	1.6	36	0.0165441
sp|A0A1F4|EYS_DROME	2176	sp|P27113|LYAM2_RABIT	551	304	339	145	180	0.94	36	0.0165441
sp|A0A1F4|EYS_DROME	2176	sp|P27113|LYAM2_RABIT	551	186	221	145	180	2.2	36	0.0165441
sp|A0A1F4|EYS_DROME	2176	sp|P33730|LYAM2_CANFA	611	304	339	144	179	6.7	36	0.0165441
sp|A0A1F4|EYS_DROME	2176	sp|P16581|LYAM2_HUMAN	610	1591	1625	145	179	4.1	35	0.0160846
sp|A0A1F4|EYS_DROME	2176	sp|Q05769|PGH2_MOUSE	604	186	217	21	54	0.17	34	0.015625
sp|A0A1F4|EYS_DROME	2176	sp|Q05769|PGH2_MOUSE	604	224	255	21	54	8.1	34	0.015625
sp|A0A1F4|EYS_DROME	2176	sp|P35354|PGH2_HUMAN	604	186	217	21	54	0.2	34	0.015625
sp|A0A1F4|EYS_DROME	2176	sp|Q00690|LYAM2_MOUSE	612	1591	1624	145	178	9	34	0.015625
sp|A0A1F4|EYS_DROME	2176	sp|Q8CG19|LTBP1_MOUSE	1712	228	260	188	217	1.9	33	0.0151654
sp|A0A1F4|EYS_DROME	2176	sp|Q14766|LTBP1_HUMAN	1721	228	260	194	223	7.4	33	0.0151654
sp|A0A1F4|EYS_DROME	2176	sp|Q00918|LTBP1_RAT	1712	228	260	188	217	2.8	33	0.0151654
sp|A0A1F4|EYS_DROME	2176	sp|P98107|LYAM2_BOVIN	485	189	221	147	179	1	33	0.0151654
sp|A0A1F4|EYS_DROME	2176	sp|Q95LG1|LYAM2_HORSE	610	1594	1624	147	177	4.9	31	0.0142463
sp|A0A1F4|EYS_DROME	2176	sp|Q95LG1|LYAM2_HORSE	610	386	413	147	174	6.5	28	0.0128676
sp|A0A1F4|EYS_DROME 最大值										0.292411
sp|A0AUJ5|POLG_BVY3	3491	tr|I3MN91|I3MN91_SPETR	220	664	756	50	144	5.5	96	0.0274993
sp|A0AUJ5|POLG_BVY3	3491	tr|G3SXI4|G3SXI4_LOXAF	895	3127	3210	729	806	0.41	85	0.0243483
sp|A0AUJ5|POLG_BVY3	3491	tr|A8WHA6|A8WHA6_CIOIN	1123	1811	1865	505	560	3.2	56	0.0160412
sp|A0AUJ5|POLG_BVY3 最大值										0.0274993
sp|A0AVI2|FR1L5_HUMAN	2093	sp|P21579|SYT1_HUMAN	422	1413	1599	179	379	0.33	213	0.101768
sp|A0AVI2|FR1L5_HUMAN	2093	tr|G8JLH9|G8JLH9_HUMAN	672	449	578	268	394	0.85	139	0.0664118
sp|A0AVI2|FR1L5_HUMAN	2093	sp|P52631|STAT3_RAT	770	449	578	366	492	0.93	139	0.0664118
sp|A0AVI2|FR1L5_HUMAN	2093	sp|P42227|STAT3_MOUSE	770	449	578	366	492	0.93	139	0.0664118
sp|A0AVI2|FR1L5_HUMAN	2093	sp|P40763|STAT3_HUMAN	770	449	578	366	492	0.93	139	0.0664118
sp|A0AVI2|FR1L5_HUMAN	2093	sp|Q9PVX8|STA31_XENLA	769	449	578	366	492	1.1	139	0.0664118
sp|A0AVI2|FR1L5_HUMAN	2093	sp|Q8N9I0|SYT2_HUMAN	419	1510	1599	282	376	0.45	97	0.046345
sp|A0AVI2|FR1L5_HUMAN 最大值										0.101768
sp|A0B8A0|DGGGP_METTP	267	tr|F6YA99|F6YA99_MONDO	118	221	256	54	87	0.28	36	0.134831
sp|A0B8A0|DGGGP_METTP 最大值										0.134831
sp|A0B8B0|PYRH_METTP	223	tr|F7BR88|F7BR88_HORSE	635	30	63	172	205	5.8	34	0.152466
sp|A0B8B0|PYRH_METTP 最大值										0.152466
sp|A0JMF1|CTC1_DANRE	1205	tr|Q5TLE5|Q5TLE5_DANRE	169	84	115	10	52	0.25	43	0.0356846
sp|A0JMF1|CTC1_DANRE 最大值										0.0356846
sp|A0JN39|COPB_BOVIN	953	tr|D4YWD9|D4YWD9_ONCMY	205	479	532	33	87	6.1	55	0.0577125
sp|A0JN39|COPB_BOVIN 最大值										0.0577125
sp|A0JP43|EFCB5_MOUSE	1406	tr|Q5VWC9|Q5VWC9_HUMAN	187	716	854	22	158	9.4	151	0.107397
sp|A0JP43|EFCB5_MOUSE	1406	sp|P01574|IFNB_HUMAN	187	716	854	22	158	9.4	151	0.107397
sp|A0JP43|EFCB5_MOUSE	1406	tr|H0WB19|H0WB19_CAVPO	833	530	594	516	593	2.8	78	0.0554765
sp|A0JP43|EFCB5_MOUSE	1406	tr|E1BMK1|E1BMK1_BOVIN	1553	776	812	818	854	3.9	37	0.0263158
sp|A0JP43|EFCB5_MOUSE 最大值										0.107397
sp|A0JP70|WDR90_XENTR	1848	tr|Q5SW18|Q5SW18_MOUSE	410	419	757	130	408	5e-12	343	0.185606
sp|A0JP70|WDR90_XENTR	1848	sp|P63005|LIS1_MOUSE	410	419	757	130	408	5e-12	343	0.185606
sp|A0JP70|WDR90_XENTR	1848	tr|Q5SW18|Q5SW18_MOUSE	410	738	1026	117	408	0.14	304	0.164502
sp|A0JP70|WDR90_XENTR	1848	sp|P63005|LIS1_MOUSE	410	738	1026	117	408	0.14	304	0.164502
sp|A0JP70|WDR90_XENTR	1848	tr|Q5SW18|Q5SW18_MOUSE	410	1331	1565	94	369	0.26	287	0.155303
sp|A0JP70|WDR90_XENTR	1848	sp|P63005|LIS1_MOUSE	410	1331	1565	94	369	0.26	287	0.155303
sp|A0JP70|WDR90_XENTR	1848	tr|Q5SW18|Q5SW18_MOUSE	410	1409	1668	121	380	1e-05	275	0.14881
sp|A0JP70|WDR90_XENTR	1848	sp|P63005|LIS1_MOUSE	410	1409	1668	121	380	1e-05	275	0.14881
sp|A0JP70|WDR90_XENTR	1848	tr|G3UYK8|G3UYK8_MOUSE	389	1524	1781	71	313	8e-05	272	0.147186
sp|A0JP70|WDR90_XENTR	1848	tr|Q3U1N0|Q3U1N0_MOUSE	461	1524	1780	71	312	7e-05	271	0.146645
sp|A0JP70|WDR90_XENTR	1848	sp|O89053|COR1A_MOUSE	461	1524	1780	71	312	7e-05	271	0.146645
sp|A0JP70|WDR90_XENTR	1848	tr|F7EI58|F7EI58_MONDO	460	1524	1781	71	313	0.0003	271	0.146645
sp|A0JP70|WDR90_XENTR	1848	sp|Q92176|COR1A_BOVIN	461	1524	1780	71	312	0.0005	271	0.146645
sp|A0JP70|WDR90_XENTR	1848	tr|D2HX51|D2HX51_AILME	461	1524	1780	71	312	0.001	271	0.146645
sp|A0JP70|WDR90_XENTR	1848	sp|Q91ZN1|COR1A_RAT	461	1524	1780	71	312	7e-05	270	0.146104
sp|A0JP70|WDR90_XENTR	1848	tr|G3U077|G3U077_LOXAF	459	1524	1780	71	310	0.0001	268	0.145022
sp|A0JP70|WDR90_XENTR	1848	tr|F6Q6X3|F6Q6X3_HORSE	461	1530	1780	77	312	0.0006	265	0.143398
sp|A0JP70|WDR90_XENTR	1848	sp|P31146|COR1A_HUMAN	461	1530	1780	77	312	0.001	265	0.143398
sp|A0JP70|WDR90_XENTR	1848	tr|E2QSZ5|E2QSZ5_CANFA	461	1530	1780	77	312	0.005	265	0.143398
sp|A0JP70|WDR90_XENTR	1848	tr|Q5SW18|Q5SW18_MOUSE	410	1237	1463	132	365	0.004	243	0.131494
sp|A0JP70|WDR90_XENTR	1848	sp|P63005|LIS1_MOUSE	410	1237	1463	132	365	0.004	243	0.131494
sp|A0JP70|WDR90_XENTR	1848	tr|Q5SW18|Q5SW18_MOUSE	410	1528	1713	144	372	0.003	240	0.12987
sp|A0JP70|WDR90_XENTR	1848	sp|P63005|LIS1_MOUSE	410	1528	1713	144	372	0.003	240	0.12987
sp|A0JP70|WDR90_XENTR	1848	tr|Q5SW18|Q5SW18_MOUSE	410	1252	1463	190	407	0.003	232	0.125541
sp|A0JP70|WDR90_XENTR	1848	sp|P63005|LIS1_MOUSE	410	1252	1463	190	407	0.003	232	0.125541
sp|A0JP70|WDR90_XENTR	1848	tr|F7EI58|F7EI58_MONDO	460	662	864	98	318	0.14	231	0.125
sp|A0JP70|WDR90_XENTR	1848	sp|Q92176|COR1A_BOVIN	461	662	864	98	318	1.2	224	0.121212
sp|A0JP70|WDR90_XENTR	1848	tr|D2HX51|D2HX51_AILME	461	651	864	97	318	3.4	224	0.121212
sp|A0JP70|WDR90_XENTR	1848	sp|Q91ZN1|COR1A_RAT	461	662	864	98	318	5.4	223	0.120671
sp|A0JP70|WDR90_XENTR	1848	tr|Q3U1N0|Q3U1N0_MOUSE	461	662	864	98	318	1.5	223	0.120671
sp|A0JP70|WDR90_XENTR	1848	sp|O89053|COR1A_MOUSE	461	662	864	98	318	1.5	223	0.120671
sp|A0JP70|WDR90_XENTR	1848	tr|G3UYK8|G3UYK8_MOUSE	389	662	864	98	318	1.6	223	0.120671
sp|A0JP70|WDR90_XENTR	1848	tr|F6Q6X3|F6Q6X3_HORSE	461	662	864	98	318	0.61	223	0.120671
sp|A0JP70|WDR90_XENTR	1848	sp|P31146|COR1A_HUMAN	461	662	864	98	318	2.8	223	0.120671
sp|A0JP70|WDR90_XENTR	1848	tr|E2QSZ5|E2QSZ5_CANFA	461	662	864	98	318	0.83	222	0.12013
sp|A0JP70|WDR90_XENTR	1848	sp|Q96EE3|SEH1_HUMAN	360	1520	1709	102	287	1.3	207	0.112013
sp|A0JP70|WDR90_XENTR	1848	tr|Q5SW18|Q5SW18_MOUSE	410	1530	1715	104	272	0.0005	186	0.100649
sp|A0JP70|WDR90_XENTR	1848	sp|P63005|LIS1_MOUSE	410	1530	1715	104	272	0.0005	186	0.100649
sp|A0JP70|WDR90_XENTR	1848	tr|Q5SW18|Q5SW18_MOUSE	410	686	846	107	267	8e-07	161	0.0871212
sp|A0JP70|WDR90_XENTR	1848	sp|P63005|LIS1_MOUSE	410	686	846	107	267	8e-07	161	0.0871212
sp|A0JP70|WDR90_XENTR	1848	sp|P78406|RAE1L_HUMAN	368	633	782	25	182	0.066	159	0.086039
sp|A0JP70|WDR90_XENTR	1848	sp|Q91ZN1|COR1A_RAT	461	628	760	17	163	2.3	149	0.0806277
sp|A0JP70|WDR90_XENTR	1848	tr|Q3U1N0|Q3U1N0_MOUSE	461	628	760	17	163	2.6	149	0.0806277
sp|A0JP70|WDR90_XENTR	1848	sp|O89053|COR1A_MOUSE	461	628	760	17	163	2.6	149	0.0806277
sp|A0JP70|WDR90_XENTR	1848	tr|G3UYK8|G3UYK8_MOUSE	389	628	760	17	163	1.4	149	0.0806277
sp|A0JP70|WDR90_XENTR	1848	tr|D3YW57|D3YW57_MOUSE	233	628	760	17	163	0.58	149	0.0806277
sp|A0JP70|WDR90_XENTR	1848	tr|D2HX51|D2HX51_AILME	461	628	760	17	163	0.42	149	0.0806277
sp|A0JP70|WDR90_XENTR	1848	tr|G3U077|G3U077_LOXAF	459	628	760	17	161	6.6	148	0.0800866
sp|A0JP70|WDR90_XENTR	1848	tr|D3YW57|D3YW57_MOUSE	233	1524	1661	71	211	0.0002	148	0.0800866
sp|A0JP70|WDR90_XENTR	1848	tr|H3BRJ0|H3BRJ0_HUMAN	249	1530	1661	77	211	0.007	142	0.0768398
sp|A0JP70|WDR90_XENTR	1848	sp|Q92176|COR1A_BOVIN	461	637	760	29	163	0.85	138	0.0746753
sp|A0JP70|WDR90_XENTR	1848	sp|Q8NFH4|NUP37_HUMAN	326	705	802	96	197	0.041	104	0.0562771
sp|A0JP70|WDR90_XENTR	1848	sp|Q91WG4|ELP2_MOUSE	831	1252	1351	565	657	0.005	100	0.0541126
sp|A0JP70|WDR90_XENTR	1848	tr|F7EI58|F7EI58_MONDO	460	686	760	80	163	1.5	84	0.0454545
sp|A0JP70|WDR90_XENTR	1848	tr|F6Q6X3|F6Q6X3_HORSE	461	686	760	80	163	3.2	84	0.0454545
sp|A0JP70|WDR90_XENTR	1848	tr|E2QSZ5|E2QSZ5_CANFA	461	686	760	80	163	2.6	84	0.0454545
sp|A0JP70|WDR90_XENTR	1848	sp|Q91WG4|ELP2_MOUSE	831	430	503	559	635	4.3	77	0.0416667
sp|A0JP70|WDR90_XENTR	1848	sp|Q8NFH3|NUP43_HUMAN	380	980	1026	195	246	1.7	52	0.0281385
sp|A0JP70|WDR90_XENTR 最大值										0.185606
sp|A0K6X5|IF2_BURCH	971	sp|P68105|EF1A1_RABIT	462	476	628	10	203	2e-07	197	0.202884
sp|A0K6X5|IF2_BURCH	971	sp|Q5R4R8|EF1A1_PONAB	462	476	628	10	203	2e-07	197	0.202884
sp|A0K6X5|IF2_BURCH	971	sp|Q5R1X2|EF1A1_PANTR	462	476	628	10	203	2e-07	197	0.202884
sp|A0K6X5|IF2_BURCH	971	sp|P68104|EF1A1_HUMAN	462	476	628	10	203	2e-07	197	0.202884
sp|A0K6X5|IF2_BURCH	971	sp|Q66RN5|EF1A1_FELCA	462	476	628	10	203	2e-07	197	0.202884
sp|A0K6X5|IF2_BURCH	971	sp|P68103|EF1A1_BOVIN	462	476	628	10	203	2e-07	197	0.202884
sp|A0K6X5|IF2_BURCH	971	sp|P62630|EF1A1_RAT	462	476	628	10	203	2e-07	197	0.202884
sp|A0K6X5|IF2_BURCH	971	sp|P10126|EF1A1_MOUSE	462	476	628	10	203	2e-07	197	0.202884
sp|A0K6X5|IF2_BURCH	971	sp|P62629|EF1A1_CRIGR	462	476	628	10	203	2e-07	197	0.202884
sp|A0K6X5|IF2_BURCH	971	sp|A2Q0Z0|EF1A1_HORSE	462	476	628	10	203	2e-07	197	0.202884
sp|A0K6X5|IF2_BURCH	971	tr|Q800W9|Q800W9_CYPCA	462	476	628	10	203	3e-06	197	0.202884
sp|A0K6X5|IF2_BURCH	971	sp|Q86VP1|TAXB1_HUMAN	789	124	257	159	303	4.3	147	0.15139
sp|A0K6X5|IF2_BURCH	971	sp|Q5R4U3|TAXB1_PONAB	813	124	257	159	303	5.8	147	0.15139
sp|A0K6X5|IF2_BURCH	971	sp|Q66HA4|TAXB1_RAT	813	135	254	170	300	0.051	133	0.136972
sp|A0K6X5|IF2_BURCH	971	sp|Q3UKC1|TAXB1_MOUSE	814	135	254	170	300	0.17	133	0.136972
sp|A0K6X5|IF2_BURCH	971	sp|P08644|RASK_RAT	189	515	640	46	169	0.023	131	0.134912
sp|A0K6X5|IF2_BURCH	971	sp|P32883|RASK_MOUSE	189	515	640	46	169	0.023	131	0.134912
sp|A0K6X5|IF2_BURCH	971	sp|P01116|RASK_HUMAN	189	515	640	46	169	0.026	131	0.134912
sp|A0K6X5|IF2_BURCH	971	tr|Q800W9|Q800W9_CYPCA	462	837	957	218	324	8.3	123	0.126674
sp|A0K6X5|IF2_BURCH	971	tr|Q5J7N1|Q5J7N1_MOUSE	188	515	625	46	154	0.001	116	0.119464
sp|A0K6X5|IF2_BURCH	971	tr|G9K5N5|G9K5N5_MUSPF	439	657	707	330	387	2.2	58	0.0597322
sp|A0K6X5|IF2_BURCH 最大值										0.202884
sp|A0KCS0|CH603_BURCH	540	tr|F6Z587|F6Z587_HORSE	575	3	528	27	555	0	529	0.97963
sp|A0KCS0|CH603_BURCH	540	tr|F1SMZ7|F1SMZ7_PIG	575	3	528	27	555	0	529	0.97963
sp|A0KCS0|CH603_BURCH	540	sp|P63038|CH60_MOUSE	573	3	528	27	553	0	527	0.975926
sp|A0KCS0|CH603_BURCH	540	tr|F1MUZ9|F1MUZ9_BOVIN	573	3	528	27	553	0	527	0.975926
sp|A0KCS0|CH603_BURCH	540	sp|P10809|CH60_HUMAN	573	3	528	27	553	0	527	0.975926
sp|A0KCS0|CH603_BURCH	540	tr|F6PQQ8|F6PQQ8_MONDO	573	3	528	27	553	0	527	0.975926
sp|A0KCS0|CH603_BURCH	540	tr|G9F6X6|G9F6X6_PIG	573	3	528	27	553	0	527	0.975926
sp|A0KCS0|CH603_BURCH	540	tr|G1LTM3|G1LTM3_AILME	240	4	206	25	224	2e-43	203	0.375926
sp|A0KCS0|CH603_BURCH	540	tr|G3TZG9|G3TZG9_LOXAF	171	16	206	3	168	2e-44	192	0.355556
sp|A0KCS0|CH603_BURCH	540	tr|D3Z2F2|D3Z2F2_MOUSE	202	3	178	27	202	3e-62	176	0.325926
sp|A0KCS0|CH603_BURCH	540	tr|D3Z7J9|D3Z7J9_MOUSE	142	3	118	27	142	5e-39	116	0.214815
sp|A0KCS0|CH603_BURCH	540	tr|Q5UES3|Q5UES3_PIG	116	16	128	3	115	2e-37	113	0.209259
sp|A0KCS0|CH603_BURCH	540	tr|G3W289|G3W289_SARHA	191	46	143	50	142	8.1	98	0.181481
sp|A0KCS0|CH603_BURCH	540	tr|F6WUU2|F6WUU2_MONDO	192	66	143	65	143	6.2	80	0.148148
sp|A0KCS0|CH603_BURCH	540	tr|A6MK13|A6MK13_CALJA	83	466	528	1	63	3e-13	63	0.116667
sp|A0KCS0|CH603_BURCH 最大值										0.97963
sp|A0KGL1|CH60_AERHH	544	tr|F6Z587|F6Z587_HORSE	575	3	528	27	555	0	529	0.972426
sp|A0KGL1|CH60_AERHH	544	tr|F1SMZ7|F1SMZ7_PIG	575	3	528	27	555	1e-179	529	0.972426
sp|A0KGL1|CH60_AERHH	544	tr|F6PQQ8|F6PQQ8_MONDO	573	3	528	27	553	0	527	0.96875
sp|A0KGL1|CH60_AERHH	544	sp|P63038|CH60_MOUSE	573	3	528	27	553	0	527	0.96875
sp|A0KGL1|CH60_AERHH	544	sp|P10809|CH60_HUMAN	573	3	528	27	553	0	527	0.96875
sp|A0KGL1|CH60_AERHH	544	tr|F1MUZ9|F1MUZ9_BOVIN	573	3	528	27	553	0	527	0.96875
sp|A0KGL1|CH60_AERHH	544	tr|G9F6X6|G9F6X6_PIG	573	3	528	27	553	1e-178	527	0.96875
sp|A0KGL1|CH60_AERHH	544	tr|G1LTM3|G1LTM3_AILME	240	4	209	25	227	4e-42	206	0.378676
sp|A0KGL1|CH60_AERHH	544	tr|G3TZG9|G3TZG9_LOXAF	171	16	206	3	168	1e-38	192	0.352941
sp|A0KGL1|CH60_AERHH	544	sp|Q99567|NUP88_HUMAN	741	233	400	491	672	9.1	190	0.349265
sp|A0KGL1|CH60_AERHH	544	tr|D3Z2F2|D3Z2F2_MOUSE	202	3	178	27	202	2e-61	176	0.323529
sp|A0KGL1|CH60_AERHH	544	tr|D3Z7J9|D3Z7J9_MOUSE	142	3	118	27	142	9e-42	116	0.213235
sp|A0KGL1|CH60_AERHH	544	tr|Q5UES3|Q5UES3_PIG	116	16	129	3	116	2e-38	114	0.209559
sp|A0KGL1|CH60_AERHH	544	tr|H3BGX0|H3BGX0_LATCH	667	475	532	471	529	1.8	59	0.108456
sp|A0KGL1|CH60_AERHH	544	tr|H3BGW9|H3BGW9_LATCH	826	475	532	471	529	2	59	0.108456
sp|A0KGL1|CH60_AERHH	544	tr|A6MK13|A6MK13_CALJA	83	477	528	12	63	7e-08	52	0.0955882
sp|A0KGL1|CH60_AERHH 最大值										0.972426
sp|A0KRK0|SELU_SHESA	365	sp|P34158|CFTR_RAT	1476	146	217	453	529	3.1	77	0.210959
sp|A0KRK0|SELU_SHESA	365	sp|P26361|CFTR_MOUSE	1476	146	178	453	486	5.8	34	0.0931507
sp|A0KRK0|SELU_SHESA 最大值										0.210959
sp|A0L170|CH60_SHESA	545	tr|F6Z587|F6Z587_HORSE	575	3	526	27	553	0	527	0.966972
sp|A0L170|CH60_SHESA	545	tr|F1SMZ7|F1SMZ7_PIG	575	3	526	27	553	1e-180	527	0.966972
sp|A0L170|CH60_SHESA	545	sp|P63038|CH60_MOUSE	573	3	526	27	551	0	525	0.963303
sp|A0L170|CH60_SHESA	545	sp|P10809|CH60_HUMAN	573	3	526	27	551	0	525	0.963303
sp|A0L170|CH60_SHESA	545	tr|F6PQQ8|F6PQQ8_MONDO	573	3	526	27	551	0	525	0.963303
sp|A0L170|CH60_SHESA	545	tr|F1MUZ9|F1MUZ9_BOVIN	573	3	526	27	551	0	525	0.963303
sp|A0L170|CH60_SHESA	545	tr|G9F6X6|G9F6X6_PIG	573	3	526	27	551	5e-180	525	0.963303
sp|A0L170|CH60_SHESA	545	tr|G1LTM3|G1LTM3_AILME	240	4	209	25	227	7e-42	206	0.377982
sp|A0L170|CH60_SHESA	545	tr|G3TZG9|G3TZG9_LOXAF	171	16	206	3	168	4e-39	192	0.352294
sp|A0L170|CH60_SHESA	545	tr|D3Z2F2|D3Z2F2_MOUSE	202	3	178	27	202	7e-60	176	0.322936
sp|A0L170|CH60_SHESA	545	tr|D3Z7J9|D3Z7J9_MOUSE	142	3	118	27	142	6e-41	116	0.212844
sp|A0L170|CH60_SHESA	545	tr|Q5UES3|Q5UES3_PIG	116	16	128	3	115	5e-38	113	0.207339
sp|A0L170|CH60_SHESA	545	tr|H3A4R1|H3A4R1_LATCH	1011	351	431	302	382	6.3	82	0.150459
sp|A0L170|CH60_SHESA	545	tr|A6MK13|A6MK13_CALJA	83	469	526	4	61	1e-08	58	0.106422
sp|A0L170|CH60_SHESA	545	tr|H3BGX0|H3BGX0_LATCH	667	488	532	484	529	1.7	46	0.0844037
sp|A0L170|CH60_SHESA	545	tr|H3BGW9|H3BGW9_LATCH	826	488	532	484	529	2.2	46	0.0844037
sp|A0L170|CH60_SHESA	545	tr|F5GY90|F5GY90_HUMAN	187	160	190	45	76	5.4	32	0.0587156
sp|A0L170|CH60_SHESA	545	sp|P08397|HEM3_HUMAN	361	160	190	62	93	9.5	32	0.0587156
sp|A0L170|CH60_SHESA 最大值										0.966972
sp|A0L4C9|CH60_MAGSM	551	tr|F6Z587|F6Z587_HORSE	575	3	530	27	555	0	531	0.963702
sp|A0L4C9|CH60_MAGSM	551	tr|F1SMZ7|F1SMZ7_PIG	575	3	530	27	555	0	531	0.963702
sp|A0L4C9|CH60_MAGSM	551	sp|P63038|CH60_MOUSE	573	3	530	27	553	0	529	0.960073
sp|A0L4C9|CH60_MAGSM	551	sp|P10809|CH60_HUMAN	573	3	530	27	553	0	529	0.960073
sp|A0L4C9|CH60_MAGSM	551	tr|F6PQQ8|F6PQQ8_MONDO	573	3	530	27	553	0	529	0.960073
sp|A0L4C9|CH60_MAGSM	551	tr|F1MUZ9|F1MUZ9_BOVIN	573	3	530	27	553	0	529	0.960073
sp|A0L4C9|CH60_MAGSM	551	tr|G9F6X6|G9F6X6_PIG	573	3	530	27	553	0	529	0.960073
sp|A0L4C9|CH60_MAGSM	551	tr|G1LTM3|G1LTM3_AILME	240	4	209	25	227	4e-41	206	0.373866
sp|A0L4C9|CH60_MAGSM	551	tr|G3TZG9|G3TZG9_LOXAF	171	14	208	1	170	4e-42	196	0.355717
sp|A0L4C9|CH60_MAGSM	551	tr|D3Z2F2|D3Z2F2_MOUSE	202	3	178	27	202	4e-63	176	0.319419
sp|A0L4C9|CH60_MAGSM	551	tr|D3Z7J9|D3Z7J9_MOUSE	142	3	118	27	142	7e-42	116	0.210526
sp|A0L4C9|CH60_MAGSM	551	tr|Q5UES3|Q5UES3_PIG	116	14	128	1	115	9e-41	115	0.208711
sp|A0L4C9|CH60_MAGSM	551	tr|Q6DJC0|Q6DJC0_XENTR	199	438	499	4	63	3	62	0.112523
sp|A0L4C9|CH60_MAGSM	551	tr|G9IJ36|G9IJ36_ZONAL	78	444	499	4	57	0.97	56	0.101633
sp|A0L4C9|CH60_MAGSM	551	tr|A6MK13|A6MK13_CALJA	83	479	530	12	63	5e-09	52	0.0943739
sp|A0L4C9|CH60_MAGSM	551	tr|Q5S3P4|Q5S3P4_PIG	214	444	493	4	53	1.1	50	0.0907441
sp|A0L4C9|CH60_MAGSM	551	sp|Q68AM8|SOCS3_CANFA	225	444	485	12	53	0.5	42	0.076225
sp|A0L4C9|CH60_MAGSM	551	tr|G5AVF0|G5AVF0_HETGA	226	444	485	12	53	0.89	42	0.076225
sp|A0L4C9|CH60_MAGSM	551	tr|B1H0V9|B1H0V9_PIG	229	444	485	12	53	1	42	0.076225
sp|A0L4C9|CH60_MAGSM	551	tr|E5EZY0|E5EZY0_PIG	229	444	485	12	53	1.1	42	0.076225
sp|A0L4C9|CH60_MAGSM	551	tr|B2CXY7|B2CXY7_HORSE	229	444	485	12	53	1.1	42	0.076225
sp|A0L4C9|CH60_MAGSM	551	tr|G3H3F1|G3H3F1_CRIGR	225	444	485	12	53	1.2	42	0.076225
sp|A0L4C9|CH60_MAGSM	551	tr|G3V6D2|G3V6D2_RAT	225	444	485	12	53	1.3	42	0.076225
sp|A0L4C9|CH60_MAGSM	551	tr|B1AQL6|B1AQL6_MOUSE	225	444	485	12	53	1.3	42	0.076225
sp|A0L4C9|CH60_MAGSM	551	sp|O35718|SOCS3_MOUSE	225	444	485	12	53	1.3	42	0.076225
sp|A0L4C9|CH60_MAGSM	551	sp|O88583|SOCS3_RAT	225	444	485	12	53	1.4	42	0.076225
sp|A0L4C9|CH60_MAGSM	551	tr|Q6FI39|Q6FI39_HUMAN	225	444	485	12	53	1.4	42	0.076225
sp|A0L4C9|CH60_MAGSM	551	sp|O14543|SOCS3_HUMAN	225	444	485	12	53	1.4	42	0.076225
sp|A0L4C9|CH60_MAGSM	551	tr|G9KQK6|G9KQK6_MUSPF	225	444	485	12	53	1.5	42	0.076225
sp|A0L4C9|CH60_MAGSM	551	tr|Q153Y9|Q153Y9_PIG	223	444	485	12	53	2.2	42	0.076225
sp|A0L4C9|CH60_MAGSM	551	sp|Q9BEG9|SOCS3_BOVIN	229	444	485	12	53	4.1	42	0.076225
sp|A0L4C9|CH60_MAGSM 最大值										0.963702
sp|A0LJ91|KUP1_SYNFM	661	tr|G5BJ26|G5BJ26_HETGA	144	514	579	10	90	0.26	81	0.122542
sp|A0LJ91|KUP1_SYNFM 最大值										0.122542
sp|A0LK67|Y2137_SYNFM	874	sp|P53347|ONCM_MOUSE	263	324	424	45	155	0.011	112	0.128146
sp|A0LK67|Y2137_SYNFM 最大值										0.128146
sp|A0MD28|RPOA_PRRSS	3838	tr|G5BAH5|G5BAH5_HETGA	210	1118	1276	8	153	1.2	159	0.0414278
sp|A0MD28|RPOA_PRRSS	3838	tr|Q8VI80|Q8VI80_RAT	208	1120	1261	10	141	0.35	142	0.0369984
sp|A0MD28|RPOA_PRRSS	3838	tr|A9P558|A9P558_MOUSE	253	320	384	26	91	6.4	66	0.0171965
sp|A0MD28|RPOA_PRRSS	3838	sp|Q00941|CSF2R_MOUSE	388	320	384	26	91	8.6	66	0.0171965
sp|A0MD28|RPOA_PRRSS	3838	tr|B2RWT6|B2RWT6_MOUSE	388	320	384	26	91	8.8	66	0.0171965
sp|A0MD28|RPOA_PRRSS	3838	tr|A9P557|A9P557_MOUSE	363	320	384	26	91	9.5	66	0.0171965
sp|A0MD28|RPOA_PRRSS 最大值										0.0414278
sp|A0PJ24|L_BCNVU	2216	tr|Q7T5I0|Q7T5I0_GVCL	409	776	857	170	248	2.7	82	0.0370036
sp|A0PJ24|L_BCNVU	2216	tr|E1BA27|E1BA27_BOVIN	592	972	1037	182	253	8.6	75	0.0338448
sp|A0PJ24|L_BCNVU 最大值										0.0370036
sp|A0PW60|GLMU_MYCUA	492	tr|C1ID49|C1ID49_DANRE	605	85	177	508	605	0.37	98	0.199187
sp|A0PW60|GLMU_MYCUA	492	tr|Q58IU6|Q58IU6_CHICK	145	139	232	17	108	5.8	98	0.199187
sp|A0PW60|GLMU_MYCUA	492	tr|D3GGX2|D3GGX2_CHICK	145	139	232	17	108	7.7	98	0.199187
sp|A0PW60|GLMU_MYCUA	492	tr|Q6UA22|Q6UA22_DANRE	602	85	162	508	588	1.2	81	0.164634
sp|A0PW60|GLMU_MYCUA	492	tr|F1QG81|F1QG81_DANRE	606	85	162	509	589	1.2	81	0.164634
sp|A0PW60|GLMU_MYCUA	492	tr|B3DI57|B3DI57_DANRE	605	85	162	508	588	1.3	81	0.164634
sp|A0PW60|GLMU_MYCUA	492	sp|P48551|INAR2_HUMAN	515	41	72	377	408	2.4	32	0.0650407
sp|A0PW60|GLMU_MYCUA 最大值										0.199187
sp|A0Q2T1|CH60_CLONN	543	tr|F1SMZ7|F1SMZ7_PIG	575	2	527	27	558	1e-179	532	0.979742
sp|A0Q2T1|CH60_CLONN	543	tr|F6Z587|F6Z587_HORSE	575	2	527	27	558	5e-179	532	0.979742
sp|A0Q2T1|CH60_CLONN	543	sp|P10809|CH60_HUMAN	573	2	527	27	556	0	530	0.976059
sp|A0Q2T1|CH60_CLONN	543	sp|P63038|CH60_MOUSE	573	2	527	27	556	0	530	0.976059
sp|A0Q2T1|CH60_CLONN	543	tr|F1MUZ9|F1MUZ9_BOVIN	573	2	527	27	556	0	530	0.976059
sp|A0Q2T1|CH60_CLONN	543	tr|F6PQQ8|F6PQQ8_MONDO	573	2	529	27	556	0	530	0.976059
sp|A0Q2T1|CH60_CLONN	543	tr|G9F6X6|G9F6X6_PIG	573	2	527	27	556	6e-179	530	0.976059
sp|A0Q2T1|CH60_CLONN	543	tr|G1LTM3|G1LTM3_AILME	240	3	213	25	233	9e-41	211	0.388582
sp|A0Q2T1|CH60_CLONN	543	tr|G3TZG9|G3TZG9_LOXAF	171	15	203	3	167	1e-37	191	0.35175
sp|A0Q2T1|CH60_CLONN	543	tr|D3Z2F2|D3Z2F2_MOUSE	202	2	176	27	202	2e-57	176	0.324125
sp|A0Q2T1|CH60_CLONN	543	tr|D3Z7J9|D3Z7J9_MOUSE	142	2	117	27	142	6e-38	116	0.213628
sp|A0Q2T1|CH60_CLONN	543	tr|Q5UES3|Q5UES3_PIG	116	15	127	3	115	3e-38	113	0.208103
sp|A0Q2T1|CH60_CLONN	543	tr|A6MK13|A6MK13_CALJA	83	464	527	1	66	5e-15	66	0.121547
sp|A0Q2T1|CH60_CLONN	543	tr|F7A481|F7A481_ORNAN	117	92	150	34	97	1.7	64	0.117864
sp|A0Q2T1|CH60_CLONN	543	sp|Q80XG2|IL21_PERMA	123	332	363	73	104	2.9	32	0.0589319
sp|A0Q2T1|CH60_CLONN	543	tr|B7PXH9|B7PXH9_IXOSC	153	459	489	82	112	2.3	31	0.0570902
sp|A0Q2T1|CH60_CLONN 最大值										0.979742
sp|A0Q838|CH60_FRATN	544	tr|F1SMZ7|F1SMZ7_PIG	575	3	524	27	551	4e-172	525	0.965074
sp|A0Q838|CH60_FRATN	544	tr|F6Z587|F6Z587_HORSE	575	3	524	27	551	2e-171	525	0.965074
sp|A0Q838|CH60_FRATN	544	sp|P10809|CH60_HUMAN	573	3	524	27	549	1e-175	523	0.961397
sp|A0Q838|CH60_FRATN	544	sp|P63038|CH60_MOUSE	573	3	524	27	549	3e-175	523	0.961397
sp|A0Q838|CH60_FRATN	544	tr|F6PQQ8|F6PQQ8_MONDO	573	3	524	27	549	2e-174	523	0.961397
sp|A0Q838|CH60_FRATN	544	tr|F1MUZ9|F1MUZ9_BOVIN	573	3	524	27	549	6e-174	523	0.961397
sp|A0Q838|CH60_FRATN	544	tr|G9F6X6|G9F6X6_PIG	573	3	524	27	549	4e-171	523	0.961397
sp|A0Q838|CH60_FRATN	544	tr|G1LTM3|G1LTM3_AILME	240	4	216	25	238	1e-38	217	0.398897
sp|A0Q838|CH60_FRATN	544	tr|G3TZG9|G3TZG9_LOXAF	171	14	204	1	166	4e-40	192	0.352941
sp|A0Q838|CH60_FRATN	544	tr|D3Z2F2|D3Z2F2_MOUSE	202	3	178	27	202	9e-58	176	0.323529
sp|A0Q838|CH60_FRATN	544	tr|D3Z7J9|D3Z7J9_MOUSE	142	3	118	27	142	1e-37	116	0.213235
sp|A0Q838|CH60_FRATN	544	tr|Q5UES3|Q5UES3_PIG	116	14	120	1	107	1e-35	107	0.196691
sp|A0Q838|CH60_FRATN	544	tr|A6MK13|A6MK13_CALJA	83	466	524	1	59	3e-08	59	0.108456
sp|A0Q838|CH60_FRATN 最大值										0.965074
sp|A0QJL0|DNLI_MYCA1	526	tr|A9UQG2|A9UQG2_MONBE	390	222	287	135	199	5.4	72	0.136882
sp|A0QJL0|DNLI_MYCA1	526	tr|H2SAL8|H2SAL8_TAKRU	202	169	207	48	87	4.1	40	0.0760456
sp|A0QJL0|DNLI_MYCA1	526	tr|G3TQR6|G3TQR6_LOXAF	148	22	45	69	92	1.6	24	0.0456274
sp|A0QJL0|DNLI_MYCA1 最大值										0.136882
sp|A0QSS4|CH602_MYCS2	540	tr|F6Z587|F6Z587_HORSE	575	2	529	27	557	2e-146	532	0.985185
sp|A0QSS4|CH602_MYCS2	540	tr|F1SMZ7|F1SMZ7_PIG	575	2	529	27	557	3e-146	532	0.985185
sp|A0QSS4|CH602_MYCS2	540	tr|F6PQQ8|F6PQQ8_MONDO	573	2	529	27	555	9e-151	530	0.981481
sp|A0QSS4|CH602_MYCS2	540	sp|P63038|CH60_MOUSE	573	2	529	27	555	6e-149	530	0.981481
sp|A0QSS4|CH602_MYCS2	540	tr|F1MUZ9|F1MUZ9_BOVIN	573	2	529	27	555	4e-148	530	0.981481
sp|A0QSS4|CH602_MYCS2	540	sp|P10809|CH60_HUMAN	573	2	529	27	555	5e-148	530	0.981481
sp|A0QSS4|CH602_MYCS2	540	tr|G9F6X6|G9F6X6_PIG	573	2	529	27	555	2e-145	530	0.981481
sp|A0QSS4|CH602_MYCS2	540	tr|G1LTM3|G1LTM3_AILME	240	2	220	24	240	5e-33	223	0.412963
sp|A0QSS4|CH602_MYCS2	540	tr|G3TZG9|G3TZG9_LOXAF	171	15	203	3	167	6e-26	191	0.353704
sp|A0QSS4|CH602_MYCS2	540	tr|D3Z2F2|D3Z2F2_MOUSE	202	2	176	27	202	5e-50	176	0.325926
sp|A0QSS4|CH602_MYCS2	540	tr|D3Z7J9|D3Z7J9_MOUSE	142	2	115	27	140	7e-36	114	0.211111
sp|A0QSS4|CH602_MYCS2	540	tr|Q5UES3|Q5UES3_PIG	116	15	126	3	114	2e-36	112	0.207407
sp|A0QSS4|CH602_MYCS2	540	tr|A6MK13|A6MK13_CALJA	83	465	527	1	63	6e-07	63	0.116667
sp|A0QSS4|CH602_MYCS2	540	tr|B5FYL7|B5FYL7_TAEGU	207	361	416	148	190	3.6	56	0.103704
sp|A0QSS4|CH602_MYCS2 最大值										0.985185
sp|A0RAX7|ADDA_BACAH	1241	tr|C8CKB2|C8CKB2_PIG	163	978	1029	32	72	8.1	52	0.0419017
sp|A0RAX7|ADDA_BACAH 最大值										0.0419017
sp|A0RHV8|AMIF_BACAH	332	tr|G3HMH4|G3HMH4_CRIGR	252	164	263	109	198	0.068	112	0.337349
sp|A0RHV8|AMIF_BACAH	332	tr|C9JVV6|C9JVV6_HUMAN	125	133	197	34	96	0.91	69	0.207831
sp|A0RHV8|AMIF_BACAH	332	tr|A2A5D3|A2A5D3_MOUSE	125	133	196	34	95	0.53	68	0.204819
sp|A0RHV8|AMIF_BACAH	332	sp|Q62771|STA5A_RAT	793	133	196	34	95	2.5	68	0.204819
sp|A0RHV8|AMIF_BACAH	332	tr|Q9JIA0|Q9JIA0_MOUSE	793	133	196	34	95	2.6	68	0.204819
sp|A0RHV8|AMIF_BACAH	332	sp|P42230|STA5A_MOUSE	793	133	196	34	95	2.6	68	0.204819
sp|A0RHV8|AMIF_BACAH	332	tr|D3Z989|D3Z989_RAT	797	133	196	34	95	3	68	0.204819
sp|A0RHV8|AMIF_BACAH	332	tr|B2C3G8|B2C3G8_MOUSE	797	133	196	34	95	3.2	68	0.204819
sp|A0RHV8|AMIF_BACAH	332	tr|E2A9M9|E2A9M9_CAMFO	2066	246	296	1097	1146	2.4	51	0.153614
sp|A0RHV8|AMIF_BACAH	332	sp|Q764M5|STAT1_PIG	757	81	118	596	631	0.29	38	0.114458
sp|A0RHV8|AMIF_BACAH 最大值										0.337349
sp|A0RNU3|CH60_CAMFF	545	tr|F6Z587|F6Z587_HORSE	575	2	526	27	556	1e-178	532	0.976147
sp|A0RNU3|CH60_CAMFF	545	tr|F1SMZ7|F1SMZ7_PIG	575	2	526	27	556	9e-180	531	0.974312
sp|A0RNU3|CH60_CAMFF	545	sp|P63038|CH60_MOUSE	573	2	526	27	554	0	530	0.972477
sp|A0RNU3|CH60_CAMFF	545	sp|P10809|CH60_HUMAN	573	2	526	27	554	0	529	0.970642
sp|A0RNU3|CH60_CAMFF	545	tr|F6PQQ8|F6PQQ8_MONDO	573	2	526	27	554	4e-180	529	0.970642
sp|A0RNU3|CH60_CAMFF	545	tr|G9F6X6|G9F6X6_PIG	573	2	526	27	554	3e-179	529	0.970642
sp|A0RNU3|CH60_CAMFF	545	tr|F1MUZ9|F1MUZ9_BOVIN	573	2	526	27	554	7e-179	529	0.970642
sp|A0RNU3|CH60_CAMFF	545	tr|G1LTM3|G1LTM3_AILME	240	3	208	25	227	4e-41	206	0.377982
sp|A0RNU3|CH60_CAMFF	545	tr|G3TZG9|G3TZG9_LOXAF	171	15	207	3	170	4e-41	194	0.355963
sp|A0RNU3|CH60_CAMFF	545	tr|D3Z2F2|D3Z2F2_MOUSE	202	2	177	27	202	3e-61	176	0.322936
sp|A0RNU3|CH60_CAMFF	545	tr|D3Z7J9|D3Z7J9_MOUSE	142	2	117	27	142	2e-40	116	0.212844
sp|A0RNU3|CH60_CAMFF	545	tr|Q5UES3|Q5UES3_PIG	116	15	126	3	114	6e-39	112	0.205505
sp|A0RNU3|CH60_CAMFF	545	tr|Q3UPG1|Q3UPG1_MOUSE	344	72	165	227	317	1.9	94	0.172477
sp|A0RNU3|CH60_CAMFF	545	sp|P19356|HEM3_RAT	361	72	165	244	334	2.1	94	0.172477
sp|A0RNU3|CH60_CAMFF	545	sp|P22907|HEM3_MOUSE	361	72	165	244	334	2.4	94	0.172477
sp|A0RNU3|CH60_CAMFF	545	tr|Q8K3G0|Q8K3G0_RAT	287	476	533	61	118	2.8	60	0.110092
sp|A0RNU3|CH60_CAMFF	545	tr|A0MQ55|A0MQ55_RAT	287	476	533	61	118	2.9	60	0.110092
sp|A0RNU3|CH60_CAMFF	545	tr|E9PU84|E9PU84_RAT	287	476	533	61	118	3.2	60	0.110092
sp|A0RNU3|CH60_CAMFF	545	tr|Q29138|Q29138_TRIMA	116	176	233	48	103	2.8	58	0.106422
sp|A0RNU3|CH60_CAMFF	545	tr|A6MK13|A6MK13_CALJA	83	475	526	12	64	2e-09	53	0.0972477
sp|A0RNU3|CH60_CAMFF 最大值										0.976147
sp|A0RUM4|EF1A_CENSY	436	sp|P62630|EF1A1_RAT	462	7	430	4	441	3e-160	439	1.00688
sp|A0RUM4|EF1A_CENSY	436	sp|P10126|EF1A1_MOUSE	462	7	430	4	441	3e-160	439	1.00688
sp|A0RUM4|EF1A_CENSY	436	sp|P62629|EF1A1_CRIGR	462	7	430	4	441	3e-160	439	1.00688
sp|A0RUM4|EF1A_CENSY	436	sp|P68105|EF1A1_RABIT	462	7	430	4	441	4e-160	439	1.00688
sp|A0RUM4|EF1A_CENSY	436	sp|Q5R4R8|EF1A1_PONAB	462	7	430	4	441	4e-160	439	1.00688
sp|A0RUM4|EF1A_CENSY	436	sp|Q5R1X2|EF1A1_PANTR	462	7	430	4	441	4e-160	439	1.00688
sp|A0RUM4|EF1A_CENSY	436	sp|P68104|EF1A1_HUMAN	462	7	430	4	441	4e-160	439	1.00688
sp|A0RUM4|EF1A_CENSY	436	sp|Q66RN5|EF1A1_FELCA	462	7	430	4	441	4e-160	439	1.00688
sp|A0RUM4|EF1A_CENSY	436	sp|P68103|EF1A1_BOVIN	462	7	430	4	441	4e-160	439	1.00688
sp|A0RUM4|EF1A_CENSY	436	sp|A2Q0Z0|EF1A1_HORSE	462	7	430	4	441	3e-159	439	1.00688
sp|A0RUM4|EF1A_CENSY	436	tr|Q800W9|Q800W9_CYPCA	462	7	430	4	441	2e-156	439	1.00688
sp|A0RUM4|EF1A_CENSY 最大值										1.00688
sp|A1A4L8|MOCS3_BOVIN	455	sp|P41226|UBA7_HUMAN	1012	60	213	414	574	3e-11	163	0.358242
sp|A1A4L8|MOCS3_BOVIN	455	sp|P41226|UBA7_HUMAN	1012	61	210	15	158	1e-06	150	0.32967
sp|A1A4L8|MOCS3_BOVIN	455	sp|Q04637|IF4G1_HUMAN	1599	9	66	1185	1250	8.5	68	0.149451
sp|A1A4L8|MOCS3_BOVIN 最大值										0.358242
sp|A1A8H0|ALLS_ECOK1	308	tr|H2PFE0|H2PFE0_PONAB	978	43	99	262	326	1.8	65	0.211039
sp|A1A8H0|ALLS_ECOK1 最大值										0.211039
sp|A1ACT0|MDTB_ECOK1	1040	tr|Q6ED62|Q6ED62_AOTNI	1303	820	886	536	600	3.3	68	0.0653846
sp|A1ACT0|MDTB_ECOK1	1040	tr|Q79FZ9|Q79FZ9_MYCTU	454	682	746	195	258	3.3	65	0.0625
sp|A1ACT0|MDTB_ECOK1 最大值										0.0653846
sp|A1ADA5|ARNB_ECOK1	379	sp|Q63691|CD14_RAT	372	10	92	196	283	1.9	88	0.23219
sp|A1ADA5|ARNB_ECOK1 最大值										0.23219
sp|A1AEV0|CYSJ_ECOK1	599	sp|P70313|NOS3_MOUSE	1202	65	599	520	1159	2e-47	649	1.08347
sp|A1AEV0|CYSJ_ECOK1	599	tr|E7ESA7|E7ESA7_HUMAN	997	65	599	315	954	3e-44	649	1.08347
sp|A1AEV0|CYSJ_ECOK1	599	sp|P29474|NOS3_HUMAN	1203	65	599	521	1160	5e-44	649	1.08347
sp|A1AEV0|CYSJ_ECOK1	599	sp|Q62600|NOS3_RAT	1202	65	599	520	1159	4e-46	645	1.07679
sp|A1AEV0|CYSJ_ECOK1	599	sp|Q27995|NOS2_BOVIN	1156	65	599	540	1128	1e-55	596	0.994992
sp|A1AEV0|CYSJ_ECOK1	599	sp|Q06518|NOS2_RAT	1147	65	599	537	1125	5e-62	595	0.993322
sp|A1AEV0|CYSJ_ECOK1	599	tr|Q91LD3|Q91LD3_WSSV	674	343	381	64	103	3	40	0.066778
sp|A1AEV0|CYSJ_ECOK1 最大值										1.08347
sp|A1AJ51|CH601_ECOK1	548	tr|F6Z587|F6Z587_HORSE	575	3	528	27	555	1e-180	529	0.965328
sp|A1AJ51|CH601_ECOK1	548	tr|F1SMZ7|F1SMZ7_PIG	575	3	528	27	555	2e-179	529	0.965328
sp|A1AJ51|CH601_ECOK1	548	sp|P63038|CH60_MOUSE	573	3	528	27	553	0	527	0.961679
sp|A1AJ51|CH601_ECOK1	548	tr|F6PQQ8|F6PQQ8_MONDO	573	3	528	27	553	0	527	0.961679
sp|A1AJ51|CH601_ECOK1	548	sp|P10809|CH60_HUMAN	573	3	528	27	553	0	527	0.961679
sp|A1AJ51|CH601_ECOK1	548	tr|F1MUZ9|F1MUZ9_BOVIN	573	3	528	27	553	0	527	0.961679
sp|A1AJ51|CH601_ECOK1	548	tr|G9F6X6|G9F6X6_PIG	573	3	528	27	553	6e-179	527	0.961679
sp|A1AJ51|CH601_ECOK1	548	tr|G1LTM3|G1LTM3_AILME	240	4	209	25	227	3e-42	206	0.375912
sp|A1AJ51|CH601_ECOK1	548	tr|G3TZG9|G3TZG9_LOXAF	171	16	206	3	168	1e-38	192	0.350365
sp|A1AJ51|CH601_ECOK1	548	tr|D3Z2F2|D3Z2F2_MOUSE	202	3	178	27	202	7e-62	176	0.321168
sp|A1AJ51|CH601_ECOK1	548	tr|D3Z7J9|D3Z7J9_MOUSE	142	3	118	27	142	2e-42	116	0.211679
sp|A1AJ51|CH601_ECOK1	548	tr|Q5UES3|Q5UES3_PIG	116	16	128	3	115	4e-38	113	0.206204
sp|A1AJ51|CH601_ECOK1	548	tr|A6MK13|A6MK13_CALJA	83	477	528	12	63	1e-10	52	0.0948905
sp|A1AJ51|CH601_ECOK1 最大值										0.965328
sp|A1AWK7|CH60_RUTMC	544	tr|F6Z587|F6Z587_HORSE	575	3	527	27	554	7e-176	528	0.970588
sp|A1AWK7|CH60_RUTMC	544	tr|F1SMZ7|F1SMZ7_PIG	575	3	527	27	554	1e-175	528	0.970588
sp|A1AWK7|CH60_RUTMC	544	sp|P63038|CH60_MOUSE	573	3	527	27	552	3e-180	526	0.966912
sp|A1AWK7|CH60_RUTMC	544	sp|P10809|CH60_HUMAN	573	3	527	27	552	1e-179	526	0.966912
sp|A1AWK7|CH60_RUTMC	544	tr|F6PQQ8|F6PQQ8_MONDO	573	3	527	27	552	2e-179	526	0.966912
sp|A1AWK7|CH60_RUTMC	544	tr|F1MUZ9|F1MUZ9_BOVIN	573	3	527	27	552	3e-177	526	0.966912
sp|A1AWK7|CH60_RUTMC	544	tr|G9F6X6|G9F6X6_PIG	573	3	527	27	552	4e-175	526	0.966912
sp|A1AWK7|CH60_RUTMC	544	tr|G1LTM3|G1LTM3_AILME	240	4	216	25	238	2e-39	217	0.398897
sp|A1AWK7|CH60_RUTMC	544	tr|G3TZG9|G3TZG9_LOXAF	171	15	206	2	168	3e-39	193	0.354779
sp|A1AWK7|CH60_RUTMC	544	tr|D3Z2F2|D3Z2F2_MOUSE	202	3	178	27	202	1e-58	176	0.323529
sp|A1AWK7|CH60_RUTMC	544	tr|D3Z7J9|D3Z7J9_MOUSE	142	3	118	27	142	2e-40	116	0.213235
sp|A1AWK7|CH60_RUTMC	544	tr|Q5UES3|Q5UES3_PIG	116	15	120	2	107	2e-35	106	0.194853
sp|A1AWK7|CH60_RUTMC	544	tr|A6MK13|A6MK13_CALJA	83	466	527	1	62	7e-08	62	0.113971
sp|A1AWK7|CH60_RUTMC	544	tr|Q6PN88|Q6PN88_HUMAN	116	223	253	21	51	1.9	31	0.0569853
sp|A1AWK7|CH60_RUTMC 最大值										0.970588
sp|A1BAM3|PROA_PARDP	423	tr|O77687|O77687_SHEEP	236	37	120	109	205	4.9	97	0.229314
sp|A1BAM3|PROA_PARDP	423	tr|B2BHG1|B2BHG1_GASAC	135	287	361	48	112	4.1	77	0.182033
sp|A1BAM3|PROA_PARDP	423	sp|Q99836|MYD88_HUMAN	296	91	146	61	119	0.63	59	0.13948
sp|A1BAM3|PROA_PARDP	423	sp|Q599T9|MYD88_BOVIN	296	91	146	61	119	3.8	59	0.13948
sp|A1BAM3|PROA_PARDP	423	sp|C8BKC7|MYD88_SHEEP	296	91	146	61	119	4.5	59	0.13948
sp|A1BAM3|PROA_PARDP	423	sp|F1MHT9|NLRC4_BOVIN	1017	1	43	480	522	2.9	43	0.101655
sp|A1BAM3|PROA_PARDP	423	tr|Q6UAQ1|Q6UAQ1_TETNG	488	294	332	411	453	3.5	43	0.101655
sp|A1BAM3|PROA_PARDP 最大值										0.229314
sp|A1CBF3|IRS4_ASPCL	501	tr|G1RWT3|G1RWT3_NOMLE	516	339	387	186	246	7.5	62	0.123752
sp|A1CBF3|IRS4_ASPCL 最大值										0.123752
sp|A1CEE0|IML1_ASPCL	1845	sp|P06800|PTPRC_MOUSE	1291	798	923	24	146	6.6	136	0.0737127
sp|A1CEE0|IML1_ASPCL 最大值										0.0737127
sp|A1CP85|ARO1_ASPCL	1587	tr|G5BEN1|G5BEN1_HETGA	329	755	867	179	299	2.2	125	0.078765
sp|A1CP85|ARO1_ASPCL	1587	tr|G3VW20|G3VW20_SARHA	318	671	751	155	230	0.077	87	0.0548204
sp|A1CP85|ARO1_ASPCL	1587	tr|D6RCX7|D6RCX7_MOUSE	163	527	572	109	155	3	47	0.0296156
sp|A1CP85|ARO1_ASPCL	1587	tr|F6TYF2|F6TYF2_CALJA	281	754	794	40	80	1.9	41	0.0258349
sp|A1CP85|ARO1_ASPCL	1587	tr|G1T884|G1T884_RABIT	294	754	791	40	77	0.13	38	0.0239445
sp|A1CP85|ARO1_ASPCL	1587	tr|A0MQ55|A0MQ55_RAT	287	754	791	44	81	2	38	0.0239445
sp|A1CP85|ARO1_ASPCL	1587	tr|E9PU84|E9PU84_RAT	287	754	791	44	81	2.1	38	0.0239445
sp|A1CP85|ARO1_ASPCL	1587	tr|Q8K3G0|Q8K3G0_RAT	287	754	791	44	81	2.2	38	0.0239445
sp|A1CP85|ARO1_ASPCL	1587	sp|Q8N9B4|ANR42_HUMAN	389	527	557	81	111	3.2	31	0.0195337
sp|A1CP85|ARO1_ASPCL 最大值										0.078765
sp|A1DP85|NM111_NEOFI	1028	tr|C3YA06|C3YA06_BRAFL	973	384	475	314	415	1.4	105	0.10214
sp|A1DP85|NM111_NEOFI	1028	sp|O95257|GA45G_HUMAN	159	333	392	63	120	6.6	60	0.0583658
sp|A1DP85|NM111_NEOFI	1028	sp|Q14005|IL16_HUMAN	1332	334	360	258	284	4	27	0.0262646
sp|A1DP85|NM111_NEOFI	1028	sp|O54824|IL16_MOUSE	1322	334	360	255	281	4.1	27	0.0262646
sp|A1DP85|NM111_NEOFI 最大值										0.10214
sp|A1DWM3|MFSD6_PIG	798	tr|D3ZY95|D3ZY95_RAT	548	315	388	173	250	8.6	84	0.105263
sp|A1DWM3|MFSD6_PIG	798	tr|F7EXY8|F7EXY8_ORNAN	415	315	358	86	125	6.5	44	0.0551378
sp|A1DWM3|MFSD6_PIG	798	tr|G1KA06|G1KA06_ANOCA	512	315	358	145	184	8	44	0.0551378
sp|A1DWM3|MFSD6_PIG	798	tr|F6WFG3|F6WFG3_MONDO	531	315	358	169	208	8.5	44	0.0551378
sp|A1DWM3|MFSD6_PIG	798	tr|G9KET0|G9KET0_MUSPF	98	715	755	41	81	0.34	41	0.0513784
sp|A1DWM3|MFSD6_PIG 最大值										0.105263
sp|A1JIP3|CH60_YERE8	550	tr|F6Z587|F6Z587_HORSE	575	3	531	27	556	0	532	0.967273
sp|A1JIP3|CH60_YERE8	550	tr|F1SMZ7|F1SMZ7_PIG	575	3	531	27	556	0	532	0.967273
sp|A1JIP3|CH60_YERE8	550	sp|P63038|CH60_MOUSE	573	3	531	27	554	0	530	0.963636
sp|A1JIP3|CH60_YERE8	550	tr|F6PQQ8|F6PQQ8_MONDO	573	3	531	27	554	0	530	0.963636
sp|A1JIP3|CH60_YERE8	550	sp|P10809|CH60_HUMAN	573	3	531	27	554	0	530	0.963636
sp|A1JIP3|CH60_YERE8	550	tr|F1MUZ9|F1MUZ9_BOVIN	573	3	531	27	554	0	530	0.963636
sp|A1JIP3|CH60_YERE8	550	tr|G9F6X6|G9F6X6_PIG	573	3	531	27	554	7e-180	530	0.963636
sp|A1JIP3|CH60_YERE8	550	tr|G1LTM3|G1LTM3_AILME	240	4	209	25	227	4e-43	206	0.374545
sp|A1JIP3|CH60_YERE8	550	tr|G3TZG9|G3TZG9_LOXAF	171	16	206	3	168	2e-39	192	0.349091
sp|A1JIP3|CH60_YERE8	550	tr|D3Z2F2|D3Z2F2_MOUSE	202	3	178	27	202	3e-63	176	0.32
sp|A1JIP3|CH60_YERE8	550	tr|D3Z7J9|D3Z7J9_MOUSE	142	3	118	27	142	2e-43	116	0.210909
sp|A1JIP3|CH60_YERE8	550	tr|Q5UES3|Q5UES3_PIG	116	16	128	3	115	5e-39	113	0.205455
sp|A1JIP3|CH60_YERE8	550	tr|A6MK13|A6MK13_CALJA	83	474	531	7	64	1e-09	58	0.105455
sp|A1JIP3|CH60_YERE8	550	sp|Q6R2X3|IL1B_EUMJU	270	98	139	44	84	3.1	43	0.0781818
sp|A1JIP3|CH60_YERE8	550	tr|Q32YM7|Q32YM7_TRIMA	262	123	141	67	85	6.6	19	0.0345455
sp|A1JIP3|CH60_YERE8	550	tr|G3STJ8|G3STJ8_LOXAF	262	123	141	67	85	6.7	19	0.0345455
sp|A1JIP3|CH60_YERE8	550	tr|C6F110|C6F110_MUSPF	213	123	139	37	53	0.88	17	0.0309091
sp|A1JIP3|CH60_YERE8	550	tr|G9K5K2|G9K5K2_MUSPF	270	123	139	68	84	1	17	0.0309091
sp|A1JIP3|CH60_YERE8	550	sp|A4UYK8|IL1B_MUSPF	270	123	139	68	84	1	17	0.0309091
sp|A1JIP3|CH60_YERE8	550	tr|F7CCI7|F7CCI7_HORSE	268	123	139	66	82	2.2	17	0.0309091
sp|A1JIP3|CH60_YERE8	550	sp|Q28386|IL1B_HORSE	268	123	139	66	82	2.2	17	0.0309091
sp|A1JIP3|CH60_YERE8	550	sp|Q6PUD2|IL1B_PHOVR	270	123	139	68	84	4.2	17	0.0309091
sp|A1JIP3|CH60_YERE8	550	sp|Q2HZH0|IL1B_PHOHI	270	123	139	68	84	4.2	17	0.0309091
sp|A1JIP3|CH60_YERE8	550	tr|B1AB80|B1AB80_HORSE	268	123	139	66	82	5.6	17	0.0309091
sp|A1JIP3|CH60_YERE8 最大值										0.967273
sp|A1JJC1|CCME_YERE8	164	sp|Q8VEA8|RAB7B_MOUSE	199	1	97	1	80	0.74	103	0.628049
sp|A1JJC1|CCME_YERE8	164	sp|O43187|IRAK2_HUMAN	625	47	73	226	252	1.3	27	0.164634
sp|A1JJC1|CCME_YERE8	164	sp|Q8K4B2|IRAK3_MOUSE	609	136	157	125	146	1.4	22	0.134146
sp|A1JJC1|CCME_YERE8 最大值										0.628049
sp|A1JJS2|CYSJ_YERE8	601	sp|P70313|NOS3_MOUSE	1202	62	601	517	1159	2e-44	652	1.08486
sp|A1JJS2|CYSJ_YERE8	601	sp|P29474|NOS3_HUMAN	1203	62	601	518	1160	5e-43	652	1.08486
sp|A1JJS2|CYSJ_YERE8	601	tr|E7ESA7|E7ESA7_HUMAN	997	62	601	312	954	6e-43	651	1.08319
sp|A1JJS2|CYSJ_YERE8	601	sp|Q62600|NOS3_RAT	1202	62	601	517	1159	5e-45	649	1.07987
sp|A1JJS2|CYSJ_YERE8	601	sp|Q27995|NOS2_BOVIN	1156	57	601	532	1128	4e-56	607	1.00998
sp|A1JJS2|CYSJ_YERE8	601	sp|Q06518|NOS2_RAT	1147	62	601	534	1125	8e-63	596	0.991681
sp|A1JJS2|CYSJ_YERE8	601	sp|Q5SRE5|NU188_HUMAN	1749	341	392	547	596	3.5	54	0.0898502
sp|A1JJS2|CYSJ_YERE8 最大值										1.08486
sp|A1JJS4|CYSH_YERE8	244	tr|E1C180|E1C180_CHICK	206	8	136	41	166	0.028	130	0.532787
sp|A1JJS4|CYSH_YERE8	244	sp|Q9JJ89|CCD86_MOUSE	426	13	114	195	291	0.67	105	0.430328
sp|A1JJS4|CYSH_YERE8 最大值										0.532787
sp|A1JMM2|MUKB_YERE8	1481	tr|F7HH08|F7HH08_CALJA	244	518	588	18	88	7.5	71	0.0479406
sp|A1JMM2|MUKB_YERE8	1481	tr|Q15KJ1|Q15KJ1_PIG	373	201	264	55	113	1.1	64	0.043214
sp|A1JMM2|MUKB_YERE8	1481	tr|A2SW51|A2SW51_PIG	373	201	264	55	113	1.1	64	0.043214
sp|A1JMM2|MUKB_YERE8	1481	tr|A7BG66|A7BG66_PIG	373	201	264	55	113	1.5	64	0.043214
sp|A1JMM2|MUKB_YERE8	1481	tr|Q547H1|Q547H1_MOUSE	539	732	785	471	532	2.1	62	0.0418636
sp|A1JMM2|MUKB_YERE8	1481	sp|P58801|RIPK2_MOUSE	539	732	785	471	532	2.1	62	0.0418636
sp|A1JMM2|MUKB_YERE8	1481	tr|Q9MZF8|Q9MZF8_MACMU	126	435	490	2	63	9.1	62	0.0418636
sp|A1JMM2|MUKB_YERE8	1481	tr|A0MWC5|A0MWC5_PIG	373	201	250	55	99	6.7	50	0.033761
sp|A1JMM2|MUKB_YERE8 最大值										0.0479406
sp|A1JMN8|SYN_YERE8	466	tr|H3B7G0|H3B7G0_LATCH	284	5	52	210	257	0.89	48	0.103004
sp|A1JMN8|SYN_YERE8	466	tr|E9LR59|E9LR59_9EUKA	463	420	458	213	251	0.16	39	0.083691
sp|A1JMN8|SYN_YERE8	466	tr|D3ZVV3|D3ZVV3_RAT	190	31	58	26	53	2.8	28	0.0600858
sp|A1JMN8|SYN_YERE8	466	tr|O08627|O08627_RAT	238	31	58	26	53	4.9	28	0.0600858
sp|A1JMN8|SYN_YERE8 最大值										0.103004
sp|A1JRD5|PYRB_YERE8	311	tr|G3WA33|G3WA33_SARHA	880	187	256	312	379	1.2	70	0.22508
sp|A1JRD5|PYRB_YERE8	311	tr|G3WA32|G3WA32_SARHA	1166	187	256	328	395	3.9	70	0.22508
sp|A1JRD5|PYRB_YERE8 最大值										0.22508
sp|A1JRM4|CMOB_YERE8	323	tr|D9IL85|D9IL85_DANRE	375	37	91	156	204	2.1	55	0.170279
sp|A1JRM4|CMOB_YERE8	323	tr|Q0VFC1|Q0VFC1_XENTR	223	135	164	91	120	3.1	30	0.0928793
sp|A1JRM4|CMOB_YERE8	323	tr|F6S6E0|F6S6E0_XENTR	230	135	164	98	127	3.2	30	0.0928793
sp|A1JRM4|CMOB_YERE8	323	tr|F6UWV2|F6UWV2_XENTR	223	135	164	91	120	3.3	30	0.0928793
sp|A1JRM4|CMOB_YERE8 最大值										0.170279
sp|A1K436|CH601_AZOSB	549	tr|F6Z587|F6Z587_HORSE	575	3	528	27	555	0	530	0.965392
sp|A1K436|CH601_AZOSB	549	tr|F1SMZ7|F1SMZ7_PIG	575	3	528	27	555	0	529	0.96357
sp|A1K436|CH601_AZOSB	549	sp|P63038|CH60_MOUSE	573	3	528	27	553	0	527	0.959927
sp|A1K436|CH601_AZOSB	549	tr|F6PQQ8|F6PQQ8_MONDO	573	3	528	27	553	0	527	0.959927
sp|A1K436|CH601_AZOSB	549	sp|P10809|CH60_HUMAN	573	3	528	27	553	0	527	0.959927
sp|A1K436|CH601_AZOSB	549	tr|F1MUZ9|F1MUZ9_BOVIN	573	3	528	27	553	0	527	0.959927
sp|A1K436|CH601_AZOSB	549	tr|G9F6X6|G9F6X6_PIG	573	3	528	27	553	0	527	0.959927
sp|A1K436|CH601_AZOSB	549	tr|G1LTM3|G1LTM3_AILME	240	4	215	25	233	6e-47	212	0.386157
sp|A1K436|CH601_AZOSB	549	tr|G3TZG9|G3TZG9_LOXAF	171	16	206	3	168	1e-44	192	0.349727
sp|A1K436|CH601_AZOSB	549	tr|D3Z2F2|D3Z2F2_MOUSE	202	3	178	27	202	4e-65	176	0.320583
sp|A1K436|CH601_AZOSB	549	tr|D3Z7J9|D3Z7J9_MOUSE	142	3	118	27	142	3e-41	116	0.211293
sp|A1K436|CH601_AZOSB	549	tr|Q5UES3|Q5UES3_PIG	116	16	128	3	115	2e-38	113	0.205829
sp|A1K436|CH601_AZOSB	549	tr|H3A4R1|H3A4R1_LATCH	1011	350	424	300	375	2.6	76	0.138434
sp|A1K436|CH601_AZOSB	549	tr|A6MK13|A6MK13_CALJA	83	466	528	1	63	7e-12	63	0.114754
sp|A1K436|CH601_AZOSB 最大值										0.965392
sp|A1KPA8|CH602_MYCBP	539	tr|F6Z587|F6Z587_HORSE	575	2	530	27	557	3e-133	534	0.990724
sp|A1KPA8|CH602_MYCBP	539	tr|F6PQQ8|F6PQQ8_MONDO	573	2	530	27	555	2e-135	533	0.988868
sp|A1KPA8|CH602_MYCBP	539	tr|F1SMZ7|F1SMZ7_PIG	575	2	530	27	557	3e-133	533	0.988868
sp|A1KPA8|CH602_MYCBP	539	sp|P63038|CH60_MOUSE	573	2	530	27	555	1e-136	531	0.985158
sp|A1KPA8|CH602_MYCBP	539	sp|P10809|CH60_HUMAN	573	2	530	27	555	9e-136	531	0.985158
sp|A1KPA8|CH602_MYCBP	539	tr|F1MUZ9|F1MUZ9_BOVIN	573	2	530	27	555	4e-135	531	0.985158
sp|A1KPA8|CH602_MYCBP	539	tr|G9F6X6|G9F6X6_PIG	573	2	530	27	555	2e-132	531	0.985158
sp|A1KPA8|CH602_MYCBP	539	tr|G1LTM3|G1LTM3_AILME	240	31	220	52	240	3e-28	194	0.359926
sp|A1KPA8|CH602_MYCBP	539	tr|G3TZG9|G3TZG9_LOXAF	171	15	203	3	167	1e-23	190	0.352505
sp|A1KPA8|CH602_MYCBP	539	tr|D3Z2F2|D3Z2F2_MOUSE	202	2	176	27	202	2e-43	176	0.326531
sp|A1KPA8|CH602_MYCBP	539	tr|D3Z7J9|D3Z7J9_MOUSE	142	2	115	27	140	1e-29	114	0.211503
sp|A1KPA8|CH602_MYCBP	539	tr|Q5UES3|Q5UES3_PIG	116	15	126	3	114	8e-31	112	0.207792
sp|A1KPA8|CH602_MYCBP	539	tr|A6MK13|A6MK13_CALJA	83	466	530	1	65	0.0002	65	0.120594
sp|A1KPA8|CH602_MYCBP	539	tr|A5HU05|A5HU05_PIG	166	153	187	90	124	2.3	35	0.0649351
sp|A1KPA8|CH602_MYCBP 最大值										0.990724
sp|A1KRG6|RPOB_NEIMF	1392	tr|C3YA06|C3YA06_BRAFL	973	603	756	196	359	9	166	0.119253
sp|A1KRG6|RPOB_NEIMF 最大值										0.119253
sp|A1KS57|FTHS_NEIMF	558	sp|P11928|OAS1A_MOUSE	367	276	308	1	33	2	33	0.0591398
sp|A1KS57|FTHS_NEIMF 最大值										0.0591398
sp|A1L1C7|PAN3_XENTR	787	sp|P19525|E2AK2_HUMAN	551	396	601	273	487	0.15	230	0.292249
sp|A1L1C7|PAN3_XENTR	787	sp|Q60806|PLK3_MOUSE	631	402	601	72	258	0.001	216	0.27446
sp|A1L1C7|PAN3_XENTR	787	sp|Q9R011|PLK3_RAT	647	402	601	71	257	0.002	216	0.27446
sp|A1L1C7|PAN3_XENTR	787	sp|Q9H4B4|PLK3_HUMAN	646	402	601	71	257	0.006	216	0.27446
sp|A1L1C7|PAN3_XENTR	787	tr|F1Q1S4|F1Q1S4_CANFA	1308	141	291	23	197	0.82	179	0.227446
sp|A1L1C7|PAN3_XENTR	787	tr|C6F112|C6F112_MUSPF	70	360	434	1	52	4.9	75	0.0952986
sp|A1L1C7|PAN3_XENTR	787	tr|Q8I6J7|Q8I6J7_CIOIN	268	246	311	115	183	3.9	69	0.0876747
sp|A1L1C7|PAN3_XENTR	787	tr|F6SGE0|F6SGE0_MONDO	167	696	744	3	51	5.1	49	0.0622618
sp|A1L1C7|PAN3_XENTR 最大值										0.292249
sp|A1L1J6|ZN652_RAT	608	tr|F7C8Q1|F7C8Q1_MONDO	1154	244	554	228	535	1e-40	321	0.527961
sp|A1L1J6|ZN652_RAT	608	tr|Q4SN43|Q4SN43_TETNG	1990	246	486	921	1241	0.009	321	0.527961
sp|A1L1J6|ZN652_RAT	608	tr|F7C8Q1|F7C8Q1_MONDO	1154	194	488	569	868	2e-40	302	0.496711
sp|A1L1J6|ZN652_RAT	608	tr|Q4SN43|Q4SN43_TETNG	1990	244	486	1087	1382	4e-30	296	0.486842
sp|A1L1J6|ZN652_RAT	608	tr|Q4RHQ7|Q4RHQ7_TETNG	838	242	487	534	807	1e-38	276	0.453947
sp|A1L1J6|ZN652_RAT	608	tr|F7C8Q1|F7C8Q1_MONDO	1154	244	487	116	387	5e-35	275	0.452303
sp|A1L1J6|ZN652_RAT	608	sp|Q8TD23|ZN675_HUMAN	568	240	487	168	415	3e-45	251	0.412829
sp|A1L1J6|ZN652_RAT	608	sp|Q9EQB9|ZN287_MOUSE	759	246	487	396	637	3e-43	251	0.412829
sp|A1L1J6|ZN652_RAT	608	tr|Q5SVS9|Q5SVS9_MOUSE	748	246	487	385	626	4e-43	251	0.412829
sp|A1L1J6|ZN652_RAT	608	tr|F1SDE5|F1SDE5_PIG	760	246	487	397	638	1e-42	251	0.412829
sp|A1L1J6|ZN652_RAT	608	tr|F6Z3M1|F6Z3M1_HORSE	743	246	487	380	621	2e-42	251	0.412829
sp|A1L1J6|ZN652_RAT	608	tr|G3TH53|G3TH53_LOXAF	753	246	487	390	631	2e-42	251	0.412829
sp|A1L1J6|ZN652_RAT	608	sp|Q9HBT7|ZN287_HUMAN	754	246	487	391	632	3e-42	251	0.412829
sp|A1L1J6|ZN652_RAT	608	tr|A2T7E2|A2T7E2_PANTR	594	246	487	231	472	3e-42	251	0.412829
sp|A1L1J6|ZN652_RAT	608	tr|D4A516|D4A516_RAT	762	246	487	396	637	1e-42	251	0.412829
sp|A1L1J6|ZN652_RAT	608	tr|G3TH53|G3TH53_LOXAF	753	246	493	502	749	1e-43	250	0.411184
sp|A1L1J6|ZN652_RAT	608	tr|F7C8Q1|F7C8Q1_MONDO	1154	244	487	480	727	6e-41	250	0.411184
sp|A1L1J6|ZN652_RAT	608	tr|F7C8Q1|F7C8Q1_MONDO	1154	244	484	508	753	9e-41	249	0.409539
sp|A1L1J6|ZN652_RAT	608	tr|F7C8Q1|F7C8Q1_MONDO	1154	244	487	452	699	4e-38	249	0.409539
sp|A1L1J6|ZN652_RAT	608	tr|F7C8Q1|F7C8Q1_MONDO	1154	246	487	738	982	2e-40	247	0.40625
sp|A1L1J6|ZN652_RAT	608	tr|F7C8Q1|F7C8Q1_MONDO	1154	246	487	710	952	3e-39	245	0.402961
sp|A1L1J6|ZN652_RAT	608	tr|F7C8Q1|F7C8Q1_MONDO	1154	246	484	906	1148	4e-39	245	0.402961
sp|A1L1J6|ZN652_RAT	608	sp|Q8TD23|ZN675_HUMAN	568	246	487	286	527	8e-46	244	0.401316
sp|A1L1J6|ZN652_RAT	608	sp|Q8TD23|ZN675_HUMAN	568	246	487	258	499	8e-44	244	0.401316
sp|A1L1J6|ZN652_RAT	608	sp|Q8TD23|ZN675_HUMAN	568	246	487	202	443	2e-43	244	0.401316
sp|A1L1J6|ZN652_RAT	608	sp|Q8TD23|ZN675_HUMAN	568	246	487	230	471	6e-41	244	0.401316
sp|A1L1J6|ZN652_RAT	608	sp|Q9EQB9|ZN287_MOUSE	759	246	487	508	749	2e-44	244	0.401316
sp|A1L1J6|ZN652_RAT	608	tr|Q5SVS9|Q5SVS9_MOUSE	748	246	487	497	738	2e-44	244	0.401316
sp|A1L1J6|ZN652_RAT	608	tr|F1SDE5|F1SDE5_PIG	760	246	487	509	750	4e-44	244	0.401316
sp|A1L1J6|ZN652_RAT	608	tr|F6Z3M1|F6Z3M1_HORSE	743	246	487	492	733	1e-43	244	0.401316
sp|A1L1J6|ZN652_RAT	608	sp|Q9HBT7|ZN287_HUMAN	754	246	487	503	744	2e-43	244	0.401316
sp|A1L1J6|ZN652_RAT	608	tr|A2T7E2|A2T7E2_PANTR	594	246	487	343	584	3e-43	244	0.401316
sp|A1L1J6|ZN652_RAT	608	tr|D4A516|D4A516_RAT	762	246	487	508	749	3e-43	244	0.401316
sp|A1L1J6|ZN652_RAT	608	tr|F7C8Q1|F7C8Q1_MONDO	1154	246	487	682	923	6e-43	244	0.401316
sp|A1L1J6|ZN652_RAT	608	tr|F7C8Q1|F7C8Q1_MONDO	1154	244	477	396	633	1e-38	241	0.396382
sp|A1L1J6|ZN652_RAT	608	tr|F7C8Q1|F7C8Q1_MONDO	1154	244	477	172	405	7e-40	237	0.389803
sp|A1L1J6|ZN652_RAT	608	tr|F7C8Q1|F7C8Q1_MONDO	1154	259	487	97	331	7e-38	237	0.389803
sp|A1L1J6|ZN652_RAT	608	tr|F7C8Q1|F7C8Q1_MONDO	1154	246	463	934	1154	3e-33	224	0.368421
sp|A1L1J6|ZN652_RAT	608	sp|Q8TD23|ZN675_HUMAN	568	246	466	342	562	7e-39	223	0.366776
sp|A1L1J6|ZN652_RAT	608	sp|Q9EQB9|ZN287_MOUSE	759	246	466	536	756	2e-42	223	0.366776
sp|A1L1J6|ZN652_RAT	608	tr|Q5SVS9|Q5SVS9_MOUSE	748	246	466	525	745	2e-42	223	0.366776
sp|A1L1J6|ZN652_RAT	608	tr|F1SDE5|F1SDE5_PIG	760	246	466	537	757	6e-42	223	0.366776
sp|A1L1J6|ZN652_RAT	608	tr|F6Z3M1|F6Z3M1_HORSE	743	246	466	520	740	5e-42	223	0.366776
sp|A1L1J6|ZN652_RAT	608	sp|Q9HBT7|ZN287_HUMAN	754	246	466	531	751	6e-42	223	0.366776
sp|A1L1J6|ZN652_RAT	608	tr|A2T7E2|A2T7E2_PANTR	594	246	466	371	591	6e-42	223	0.366776
sp|A1L1J6|ZN652_RAT	608	tr|D4A516|D4A516_RAT	762	246	466	536	756	3e-41	223	0.366776
sp|A1L1J6|ZN652_RAT	608	tr|Q4RHQ7|Q4RHQ7_TETNG	838	246	462	622	838	6e-27	221	0.363487
sp|A1L1J6|ZN652_RAT	608	sp|Q9EQB9|ZN287_MOUSE	759	273	487	368	581	9e-42	216	0.355263
sp|A1L1J6|ZN652_RAT	608	tr|Q5SVS9|Q5SVS9_MOUSE	748	273	487	357	570	1e-41	216	0.355263
sp|A1L1J6|ZN652_RAT	608	tr|F1SDE5|F1SDE5_PIG	760	273	487	369	582	7e-42	216	0.355263
sp|A1L1J6|ZN652_RAT	608	tr|G3TH53|G3TH53_LOXAF	753	273	487	362	575	1e-42	216	0.355263
sp|A1L1J6|ZN652_RAT	608	sp|Q9HBT7|ZN287_HUMAN	754	273	487	363	576	2e-41	216	0.355263
sp|A1L1J6|ZN652_RAT	608	tr|A2T7E2|A2T7E2_PANTR	594	273	487	203	416	2e-41	216	0.355263
sp|A1L1J6|ZN652_RAT	608	tr|D4A516|D4A516_RAT	762	273	487	368	581	2e-40	216	0.355263
sp|A1L1J6|ZN652_RAT	608	tr|G1L1V7|G1L1V7_AILME	708	273	464	475	684	3e-29	212	0.348684
sp|A1L1J6|ZN652_RAT	608	tr|G3T952|G3T952_LOXAF	708	273	464	475	684	3e-29	212	0.348684
sp|A1L1J6|ZN652_RAT	608	tr|F6XMD7|F6XMD7_ORNAN	713	273	464	481	689	4e-29	211	0.347039
sp|A1L1J6|ZN652_RAT	608	tr|B2GUV8|B2GUV8_RAT	707	273	464	476	683	5e-31	210	0.345395
sp|A1L1J6|ZN652_RAT	608	tr|E1B8E6|E1B8E6_BOVIN	706	273	464	475	682	6e-31	210	0.345395
sp|A1L1J6|ZN652_RAT	608	tr|F7AXS6|F7AXS6_HORSE	707	273	464	476	683	7e-31	210	0.345395
sp|A1L1J6|ZN652_RAT	608	tr|Q5RB65|Q5RB65_PONAB	706	273	464	475	682	7e-31	210	0.345395
sp|A1L1J6|ZN652_RAT	608	sp|P41182|BCL6_HUMAN	706	273	464	475	682	8e-31	210	0.345395
sp|A1L1J6|ZN652_RAT	608	tr|Q544F9|Q544F9_MOUSE	707	273	464	476	683	6e-31	210	0.345395
sp|A1L1J6|ZN652_RAT	608	sp|P41183|BCL6_MOUSE	707	273	464	476	683	6e-31	210	0.345395
sp|A1L1J6|ZN652_RAT	608	tr|D2H065|D2H065_AILME	706	273	464	475	682	7e-31	210	0.345395
sp|A1L1J6|ZN652_RAT	608	sp|Q9EQB9|ZN287_MOUSE	759	295	495	363	566	7e-37	206	0.338816
sp|A1L1J6|ZN652_RAT	608	tr|Q5SVS9|Q5SVS9_MOUSE	748	295	495	352	555	8e-37	206	0.338816
sp|A1L1J6|ZN652_RAT	608	tr|F1SDE5|F1SDE5_PIG	760	295	492	364	564	2e-37	203	0.333882
sp|A1L1J6|ZN652_RAT	608	tr|G3TH53|G3TH53_LOXAF	753	295	492	357	557	3e-36	203	0.333882
sp|A1L1J6|ZN652_RAT	608	sp|Q9HBT7|ZN287_HUMAN	754	295	492	358	558	5e-37	203	0.333882
sp|A1L1J6|ZN652_RAT	608	tr|A2T7E2|A2T7E2_PANTR	594	295	492	198	398	6e-37	203	0.333882
sp|A1L1J6|ZN652_RAT	608	tr|Q4SN43|Q4SN43_TETNG	1990	298	487	1087	1270	6e-14	198	0.325658
sp|A1L1J6|ZN652_RAT	608	sp|O70237|GFI1B_MOUSE	330	220	402	132	322	1e-26	196	0.322368
sp|A1L1J6|ZN652_RAT	608	tr|Q4RHQ7|Q4RHQ7_TETNG	838	300	488	538	724	6e-33	189	0.310855
sp|A1L1J6|ZN652_RAT	608	tr|G1N6N0|G1N6N0_MELGA	707	328	504	520	704	1e-32	185	0.304276
sp|A1L1J6|ZN652_RAT	608	tr|Q4SN43|Q4SN43_TETNG	1990	246	420	1225	1401	1e-16	179	0.294408
sp|A1L1J6|ZN652_RAT	608	tr|G1N6N0|G1N6N0_MELGA	707	289	464	510	684	5e-30	177	0.291118
sp|A1L1J6|ZN652_RAT	608	tr|H0ZGK1|H0ZGK1_TAEGU	709	289	464	511	685	3e-30	177	0.291118
sp|A1L1J6|ZN652_RAT	608	sp|Q5ZM39|BCL6_CHICK	708	289	464	510	684	4e-30	177	0.291118
sp|A1L1J6|ZN652_RAT	608	tr|F1NBN7|F1NBN7_CHICK	708	289	464	510	684	4e-30	177	0.291118
sp|A1L1J6|ZN652_RAT	608	tr|F1SDE5|F1SDE5_PIG	760	316	488	357	527	1e-37	173	0.284539
sp|A1L1J6|ZN652_RAT	608	tr|F6Z3M1|F6Z3M1_HORSE	743	316	488	340	510	1e-37	173	0.284539
sp|A1L1J6|ZN652_RAT	608	sp|Q9HBT7|ZN287_HUMAN	754	316	488	351	521	2e-37	173	0.284539
sp|A1L1J6|ZN652_RAT	608	tr|A2T7E2|A2T7E2_PANTR	594	316	488	191	361	2e-37	173	0.284539
sp|A1L1J6|ZN652_RAT	608	tr|D4A516|D4A516_RAT	762	319	488	354	526	6e-37	173	0.284539
sp|A1L1J6|ZN652_RAT	608	tr|Q544F9|Q544F9_MOUSE	707	240	403	515	678	4e-25	166	0.273026
sp|A1L1J6|ZN652_RAT	608	sp|P41183|BCL6_MOUSE	707	240	403	515	678	4e-25	166	0.273026
sp|A1L1J6|ZN652_RAT	608	tr|A2D6D2|A2D6D2_MACMU	154	273	438	15	151	8e-22	166	0.273026
sp|A1L1J6|ZN652_RAT	608	tr|G1L1V7|G1L1V7_AILME	708	272	436	519	684	4e-27	166	0.273026
sp|A1L1J6|ZN652_RAT	608	sp|Q9EQB9|ZN287_MOUSE	759	324	488	362	526	1e-35	165	0.271382
sp|A1L1J6|ZN652_RAT	608	tr|Q5SVS9|Q5SVS9_MOUSE	748	324	488	351	515	1e-35	165	0.271382
sp|A1L1J6|ZN652_RAT	608	tr|G3TH53|G3TH53_LOXAF	753	324	488	356	520	6e-37	165	0.271382
sp|A1L1J6|ZN652_RAT	608	sp|Q5VTD9|GFI1B_HUMAN	330	328	488	163	324	7e-32	165	0.271382
sp|A1L1J6|ZN652_RAT	608	sp|O70237|GFI1B_MOUSE	330	328	488	163	324	4e-32	165	0.271382
sp|A1L1J6|ZN652_RAT	608	sp|Q5VTD9|GFI1B_HUMAN	330	246	402	165	322	5e-26	163	0.268092
sp|A1L1J6|ZN652_RAT	608	sp|Q5VTD9|GFI1B_HUMAN	330	300	461	165	325	2e-34	162	0.266447
sp|A1L1J6|ZN652_RAT	608	sp|O70237|GFI1B_MOUSE	330	300	461	165	325	4e-34	162	0.266447
sp|A1L1J6|ZN652_RAT	608	tr|G1L1V7|G1L1V7_AILME	708	328	486	518	678	1e-31	161	0.264803
sp|A1L1J6|ZN652_RAT	608	tr|G3T952|G3T952_LOXAF	708	328	486	518	678	1e-31	161	0.264803
sp|A1L1J6|ZN652_RAT	608	tr|D4A2U2|D4A2U2_RAT	483	321	481	333	464	6e-09	161	0.264803
sp|A1L1J6|ZN652_RAT	608	tr|B2RQ06|B2RQ06_MOUSE	465	321	481	315	446	6e-08	161	0.264803
sp|A1L1J6|ZN652_RAT	608	sp|Q9JKD9|ZBT32_MOUSE	465	321	481	315	446	6e-08	161	0.264803
sp|A1L1J6|ZN652_RAT	608	tr|F6XMD7|F6XMD7_ORNAN	713	328	486	524	683	1e-31	160	0.263158
sp|A1L1J6|ZN652_RAT	608	tr|B2GUV8|B2GUV8_RAT	707	328	486	519	677	2e-33	159	0.261513
sp|A1L1J6|ZN652_RAT	608	tr|E1B8E6|E1B8E6_BOVIN	706	328	486	518	676	3e-33	159	0.261513
sp|A1L1J6|ZN652_RAT	608	tr|F7AXS6|F7AXS6_HORSE	707	328	486	519	677	3e-33	159	0.261513
sp|A1L1J6|ZN652_RAT	608	tr|Q5RB65|Q5RB65_PONAB	706	328	486	518	676	3e-33	159	0.261513
sp|A1L1J6|ZN652_RAT	608	sp|P41182|BCL6_HUMAN	706	328	486	518	676	3e-33	159	0.261513
sp|A1L1J6|ZN652_RAT	608	tr|Q544F9|Q544F9_MOUSE	707	328	486	519	677	3e-33	159	0.261513
sp|A1L1J6|ZN652_RAT	608	sp|P41183|BCL6_MOUSE	707	328	486	519	677	3e-33	159	0.261513
sp|A1L1J6|ZN652_RAT	608	tr|D2H065|D2H065_AILME	706	328	486	518	676	3e-33	159	0.261513
sp|A1L1J6|ZN652_RAT	608	tr|H0ZGK1|H0ZGK1_TAEGU	709	328	486	521	679	1e-32	159	0.261513
sp|A1L1J6|ZN652_RAT	608	sp|Q5ZM39|BCL6_CHICK	708	328	486	520	678	2e-32	159	0.261513
sp|A1L1J6|ZN652_RAT	608	tr|F1NBN7|F1NBN7_CHICK	708	328	486	520	678	2e-32	159	0.261513
sp|A1L1J6|ZN652_RAT	608	sp|Q8TD23|ZN675_HUMAN	568	326	482	142	299	3e-23	158	0.259868
sp|A1L1J6|ZN652_RAT	608	tr|A2D6D2|A2D6D2_MACMU	154	324	466	9	151	8e-33	143	0.235197
sp|A1L1J6|ZN652_RAT	608	tr|A2D6D2|A2D6D2_MACMU	154	345	487	2	144	1e-32	143	0.235197
sp|A1L1J6|ZN652_RAT	608	sp|Q5VTD9|GFI1B_HUMAN	330	356	489	163	297	1e-24	135	0.222039
sp|A1L1J6|ZN652_RAT	608	sp|O70237|GFI1B_MOUSE	330	356	489	163	297	8e-25	135	0.222039
sp|A1L1J6|ZN652_RAT	608	tr|F7C8Q1|F7C8Q1_MONDO	1154	362	487	94	219	1e-22	126	0.207237
sp|A1L1J6|ZN652_RAT	608	tr|F1SDE5|F1SDE5_PIG	760	373	487	356	470	7e-22	115	0.189145
sp|A1L1J6|ZN652_RAT	608	tr|E1BHU5|E1BHU5_BOVIN	489	351	463	369	452	4e-07	113	0.185855
sp|A1L1J6|ZN652_RAT	608	tr|F7ASG1|F7ASG1_HORSE	491	352	463	371	453	2e-06	112	0.184211
sp|A1L1J6|ZN652_RAT	608	tr|A2D6D2|A2D6D2_MACMU	154	244	351	41	148	3e-07	110	0.180921
sp|A1L1J6|ZN652_RAT	608	tr|Q4SN43|Q4SN43_TETNG	1990	380	488	1219	1327	2e-18	109	0.179276
sp|A1L1J6|ZN652_RAT	608	sp|Q9Y2Y4|ZBT32_HUMAN	487	356	463	373	451	1e-07	108	0.177632
sp|A1L1J6|ZN652_RAT	608	tr|D2HFS4|D2HFS4_AILME	484	356	463	369	447	1e-06	108	0.177632
sp|A1L1J6|ZN652_RAT	608	tr|G1L158|G1L158_AILME	488	356	463	373	451	1e-06	108	0.177632
sp|A1L1J6|ZN652_RAT	608	tr|F1RLH6|F1RLH6_PIG	477	356	463	371	449	3e-06	108	0.177632
sp|A1L1J6|ZN652_RAT	608	tr|G1K972|G1K972_ANOCA	286	360	462	179	285	9e-06	107	0.175987
sp|A1L1J6|ZN652_RAT	608	tr|Q4RHQ7|Q4RHQ7_TETNG	838	384	488	536	640	2e-20	105	0.172697
sp|A1L1J6|ZN652_RAT	608	tr|D4A2U2|D4A2U2_RAT	483	410	505	366	456	1e-10	96	0.157895
sp|A1L1J6|ZN652_RAT	608	tr|G3TLE7|G3TLE7_LOXAF	474	410	505	357	447	1e-10	96	0.157895
sp|A1L1J6|ZN652_RAT	608	tr|B2RQ06|B2RQ06_MOUSE	465	410	505	348	438	1e-10	96	0.157895
sp|A1L1J6|ZN652_RAT	608	sp|Q9JKD9|ZBT32_MOUSE	465	410	505	348	438	1e-10	96	0.157895
sp|A1L1J6|ZN652_RAT	608	tr|E1BHU5|E1BHU5_BOVIN	489	410	505	372	462	2e-10	96	0.157895
sp|A1L1J6|ZN652_RAT	608	tr|F7ASG1|F7ASG1_HORSE	491	410	505	373	463	9e-10	96	0.157895
sp|A1L1J6|ZN652_RAT	608	sp|Q9Y2Y4|ZBT32_HUMAN	487	412	505	373	461	4e-12	94	0.154605
sp|A1L1J6|ZN652_RAT	608	tr|D2HFS4|D2HFS4_AILME	484	412	505	369	457	1e-10	94	0.154605
sp|A1L1J6|ZN652_RAT	608	tr|G1L158|G1L158_AILME	488	412	505	373	461	1e-10	94	0.154605
sp|A1L1J6|ZN652_RAT	608	tr|F1RLH6|F1RLH6_PIG	477	412	505	371	459	2e-10	94	0.154605
sp|A1L1J6|ZN652_RAT	608	tr|F6TW92|F6TW92_ORNAN	478	344	434	389	477	4e-12	93	0.152961
sp|A1L1J6|ZN652_RAT	608	tr|G1N228|G1N228_MELGA	241	344	434	152	240	6e-11	93	0.152961
sp|A1L1J6|ZN652_RAT	608	tr|G1MEY5|G1MEY5_AILME	484	344	434	395	483	1e-11	93	0.152961
sp|A1L1J6|ZN652_RAT	608	tr|Q52JJ4|Q52JJ4_PIG	510	344	434	421	509	1e-11	93	0.152961
sp|A1L1J6|ZN652_RAT	608	tr|G3U0V6|G3U0V6_LOXAF	517	344	434	428	516	2e-11	93	0.152961
sp|A1L1J6|ZN652_RAT	608	tr|F2YID5|F2YID5_MOUSE	483	344	434	394	482	2e-11	93	0.152961
sp|A1L1J6|ZN652_RAT	608	sp|Q60793|KLF4_MOUSE	483	344	434	394	482	2e-11	93	0.152961
sp|A1L1J6|ZN652_RAT	608	tr|Q923V7|Q923V7_RAT	482	344	434	393	481	2e-11	93	0.152961
sp|A1L1J6|ZN652_RAT	608	tr|F6Q2H5|F6Q2H5_HORSE	478	344	434	389	477	2e-11	93	0.152961
sp|A1L1J6|ZN652_RAT	608	sp|O43474|KLF4_HUMAN	513	344	434	424	512	2e-11	93	0.152961
sp|A1L1J6|ZN652_RAT	608	tr|A7YWE2|A7YWE2_BOVIN	477	344	434	388	476	2e-11	93	0.152961
sp|A1L1J6|ZN652_RAT	608	tr|F7DQ62|F7DQ62_MONDO	507	344	434	418	506	1e-10	93	0.152961
sp|A1L1J6|ZN652_RAT	608	tr|E1C442|E1C442_CHICK	380	344	434	291	379	1e-10	93	0.152961
sp|A1L1J6|ZN652_RAT	608	tr|D4A2U2|D4A2U2_RAT	483	314	406	354	445	1e-05	93	0.152961
sp|A1L1J6|ZN652_RAT	608	tr|G3TLE7|G3TLE7_LOXAF	474	314	406	345	436	2e-05	93	0.152961
sp|A1L1J6|ZN652_RAT	608	tr|B2RQ06|B2RQ06_MOUSE	465	314	406	336	427	2e-05	93	0.152961
sp|A1L1J6|ZN652_RAT	608	sp|Q9JKD9|ZBT32_MOUSE	465	314	406	336	427	2e-05	93	0.152961
sp|A1L1J6|ZN652_RAT	608	tr|G1N6N0|G1N6N0_MELGA	707	246	332	606	694	0.17	92	0.151316
sp|A1L1J6|ZN652_RAT	608	tr|G3TLE7|G3TLE7_LOXAF	474	382	463	357	437	2e-09	85	0.139803
sp|A1L1J6|ZN652_RAT	608	tr|G3TH53|G3TH53_LOXAF	753	405	487	353	435	5e-11	83	0.136513
sp|A1L1J6|ZN652_RAT	608	tr|H0Z7M7|H0Z7M7_TAEGU	295	357	434	213	294	1e-11	82	0.134868
sp|A1L1J6|ZN652_RAT	608	tr|G1MEY5|G1MEY5_AILME	484	243	318	400	481	0.66	82	0.134868
sp|A1L1J6|ZN652_RAT	608	tr|Q52JJ4|Q52JJ4_PIG	510	243	318	426	507	0.49	82	0.134868
sp|A1L1J6|ZN652_RAT	608	tr|G3U0V6|G3U0V6_LOXAF	517	243	318	433	514	0.53	82	0.134868
sp|A1L1J6|ZN652_RAT	608	tr|F2YID5|F2YID5_MOUSE	483	243	318	399	480	0.86	82	0.134868
sp|A1L1J6|ZN652_RAT	608	sp|Q60793|KLF4_MOUSE	483	243	318	399	480	0.86	82	0.134868
sp|A1L1J6|ZN652_RAT	608	tr|Q923V7|Q923V7_RAT	482	243	318	398	479	0.78	82	0.134868
sp|A1L1J6|ZN652_RAT	608	tr|F6Q2H5|F6Q2H5_HORSE	478	243	318	394	475	0.64	82	0.134868
sp|A1L1J6|ZN652_RAT	608	sp|O43474|KLF4_HUMAN	513	243	318	429	510	0.89	82	0.134868
sp|A1L1J6|ZN652_RAT	608	tr|A7YWE2|A7YWE2_BOVIN	477	243	318	393	474	0.87	82	0.134868
sp|A1L1J6|ZN652_RAT	608	tr|F7DQ62|F7DQ62_MONDO	507	243	318	423	504	0.52	82	0.134868
sp|A1L1J6|ZN652_RAT	608	tr|G1L9N2|G1L9N2_AILME	321	385	462	239	320	2e-05	82	0.134868
sp|A1L1J6|ZN652_RAT	608	tr|H0YRM0|H0YRM0_TAEGU	284	385	462	202	283	2e-05	82	0.134868
sp|A1L1J6|ZN652_RAT	608	tr|Q8BPQ2|Q8BPQ2_MOUSE	318	385	462	236	317	2e-05	82	0.134868
sp|A1L1J6|ZN652_RAT	608	sp|O35819|KLF6_RAT	283	385	462	201	282	2e-05	82	0.134868
sp|A1L1J6|ZN652_RAT	608	tr|F1PXY1|F1PXY1_CANFA	283	385	462	201	282	2e-05	82	0.134868
sp|A1L1J6|ZN652_RAT	608	tr|B4X5Z3|B4X5Z3_PIG	283	385	462	201	282	2e-05	82	0.134868
sp|A1L1J6|ZN652_RAT	608	tr|G3SYS9|G3SYS9_LOXAF	297	385	462	215	296	3e-05	82	0.134868
sp|A1L1J6|ZN652_RAT	608	tr|F7DGJ3|F7DGJ3_MONDO	298	385	462	216	297	4e-05	82	0.134868
sp|A1L1J6|ZN652_RAT	608	tr|F6VNJ8|F6VNJ8_HORSE	303	385	462	221	302	2e-05	82	0.134868
sp|A1L1J6|ZN652_RAT	608	tr|D2H065|D2H065_AILME	706	409	487	485	565	0.001	81	0.133224
sp|A1L1J6|ZN652_RAT	608	tr|G1L1V7|G1L1V7_AILME	708	409	487	485	565	0.001	81	0.133224
sp|A1L1J6|ZN652_RAT	608	tr|E1BHU5|E1BHU5_BOVIN	489	326	406	372	451	4e-05	81	0.133224
sp|A1L1J6|ZN652_RAT	608	tr|F7ASG1|F7ASG1_HORSE	491	326	406	373	452	1e-05	81	0.133224
sp|A1L1J6|ZN652_RAT	608	tr|F6TW92|F6TW92_ORNAN	478	301	378	400	477	5e-05	80	0.131579
sp|A1L1J6|ZN652_RAT	608	sp|Q9Y2Y4|ZBT32_HUMAN	487	300	379	375	451	0.0007	80	0.131579
sp|A1L1J6|ZN652_RAT	608	sp|Q9Y2Y4|ZBT32_HUMAN	487	273	351	375	451	0.002	80	0.131579
sp|A1L1J6|ZN652_RAT	608	tr|H0Z7M7|H0Z7M7_TAEGU	295	301	378	217	294	5e-05	80	0.131579
sp|A1L1J6|ZN652_RAT	608	tr|G1N228|G1N228_MELGA	241	301	378	163	240	0.0001	80	0.131579
sp|A1L1J6|ZN652_RAT	608	tr|G1MEY5|G1MEY5_AILME	484	301	378	406	483	9e-05	80	0.131579
sp|A1L1J6|ZN652_RAT	608	tr|Q52JJ4|Q52JJ4_PIG	510	301	378	432	509	0.0001	80	0.131579
sp|A1L1J6|ZN652_RAT	608	tr|G3U0V6|G3U0V6_LOXAF	517	301	378	439	516	9e-05	80	0.131579
sp|A1L1J6|ZN652_RAT	608	tr|F2YID5|F2YID5_MOUSE	483	301	378	405	482	0.0001	80	0.131579
sp|A1L1J6|ZN652_RAT	608	sp|Q60793|KLF4_MOUSE	483	301	378	405	482	0.0001	80	0.131579
sp|A1L1J6|ZN652_RAT	608	tr|Q923V7|Q923V7_RAT	482	301	378	404	481	9e-05	80	0.131579
sp|A1L1J6|ZN652_RAT	608	tr|F6Q2H5|F6Q2H5_HORSE	478	301	378	400	477	8e-05	80	0.131579
sp|A1L1J6|ZN652_RAT	608	sp|O43474|KLF4_HUMAN	513	301	378	435	512	0.0001	80	0.131579
sp|A1L1J6|ZN652_RAT	608	tr|A7YWE2|A7YWE2_BOVIN	477	301	378	399	476	0.0001	80	0.131579
sp|A1L1J6|ZN652_RAT	608	tr|F7DQ62|F7DQ62_MONDO	507	301	378	429	506	5e-05	80	0.131579
sp|A1L1J6|ZN652_RAT	608	tr|E1C442|E1C442_CHICK	380	301	378	302	379	0.0001	80	0.131579
sp|A1L1J6|ZN652_RAT	608	tr|D4A2U2|D4A2U2_RAT	483	273	351	370	446	0.002	80	0.131579
sp|A1L1J6|ZN652_RAT	608	tr|G3TLE7|G3TLE7_LOXAF	474	273	351	361	437	0.002	80	0.131579
sp|A1L1J6|ZN652_RAT	608	tr|G3TLE7|G3TLE7_LOXAF	474	300	379	361	437	0.013	80	0.131579
sp|A1L1J6|ZN652_RAT	608	tr|D2HFS4|D2HFS4_AILME	484	273	351	371	447	0.001	80	0.131579
sp|A1L1J6|ZN652_RAT	608	tr|D2HFS4|D2HFS4_AILME	484	300	379	371	447	0.013	80	0.131579
sp|A1L1J6|ZN652_RAT	608	tr|B2RQ06|B2RQ06_MOUSE	465	273	351	352	428	0.002	80	0.131579
sp|A1L1J6|ZN652_RAT	608	sp|Q9JKD9|ZBT32_MOUSE	465	273	351	352	428	0.002	80	0.131579
sp|A1L1J6|ZN652_RAT	608	tr|G1L158|G1L158_AILME	488	273	351	375	451	0.001	80	0.131579
sp|A1L1J6|ZN652_RAT	608	tr|G1L158|G1L158_AILME	488	300	379	375	451	0.013	80	0.131579
sp|A1L1J6|ZN652_RAT	608	tr|F1RLH6|F1RLH6_PIG	477	273	351	373	449	0.003	80	0.131579
sp|A1L1J6|ZN652_RAT	608	tr|F1RLH6|F1RLH6_PIG	477	300	379	373	449	0.026	80	0.131579
sp|A1L1J6|ZN652_RAT	608	tr|E1BHU5|E1BHU5_BOVIN	489	273	351	376	452	0.002	80	0.131579
sp|A1L1J6|ZN652_RAT	608	tr|E1BHU5|E1BHU5_BOVIN	489	300	379	376	452	0.026	80	0.131579
sp|A1L1J6|ZN652_RAT	608	tr|F7ASG1|F7ASG1_HORSE	491	273	351	377	453	0.007	80	0.131579
sp|A1L1J6|ZN652_RAT	608	tr|G1K972|G1K972_ANOCA	286	414	489	205	284	3e-08	80	0.131579
sp|A1L1J6|ZN652_RAT	608	tr|G1K972|G1K972_ANOCA	286	299	378	206	285	0.004	80	0.131579
sp|A1L1J6|ZN652_RAT	608	sp|Q9Y2Y4|ZBT32_HUMAN	487	328	406	373	450	7e-06	79	0.129934
sp|A1L1J6|ZN652_RAT	608	tr|D2HFS4|D2HFS4_AILME	484	328	406	369	446	5e-05	79	0.129934
sp|A1L1J6|ZN652_RAT	608	tr|G1L158|G1L158_AILME	488	328	406	373	450	5e-05	79	0.129934
sp|A1L1J6|ZN652_RAT	608	tr|F1RLH6|F1RLH6_PIG	477	328	406	371	448	6e-05	79	0.129934
sp|A1L1J6|ZN652_RAT	608	tr|Q4SN43|Q4SN43_TETNG	1990	353	430	916	993	9e-10	78	0.128289
sp|A1L1J6|ZN652_RAT	608	tr|Q4SN43|Q4SN43_TETNG	1990	298	375	919	994	2e-06	78	0.128289
sp|A1L1J6|ZN652_RAT	608	tr|F6TW92|F6TW92_ORNAN	478	417	491	402	478	6e-11	77	0.126645
sp|A1L1J6|ZN652_RAT	608	tr|F6TW92|F6TW92_ORNAN	478	333	407	402	478	5e-10	77	0.126645
sp|A1L1J6|ZN652_RAT	608	tr|H0Z7M7|H0Z7M7_TAEGU	295	417	491	219	295	3e-11	77	0.126645
sp|A1L1J6|ZN652_RAT	608	tr|H0Z7M7|H0Z7M7_TAEGU	295	333	407	219	295	3e-10	77	0.126645
sp|A1L1J6|ZN652_RAT	608	tr|G1N228|G1N228_MELGA	241	333	407	165	241	1e-09	77	0.126645
sp|A1L1J6|ZN652_RAT	608	tr|G1N228|G1N228_MELGA	241	388	462	164	240	3e-08	77	0.126645
sp|A1L1J6|ZN652_RAT	608	tr|G1MEY5|G1MEY5_AILME	484	417	491	408	484	1e-10	77	0.126645
sp|A1L1J6|ZN652_RAT	608	tr|G1MEY5|G1MEY5_AILME	484	333	407	408	484	1e-09	77	0.126645
sp|A1L1J6|ZN652_RAT	608	tr|Q52JJ4|Q52JJ4_PIG	510	417	491	434	510	1e-10	77	0.126645
sp|A1L1J6|ZN652_RAT	608	tr|Q52JJ4|Q52JJ4_PIG	510	333	407	434	510	1e-09	77	0.126645
sp|A1L1J6|ZN652_RAT	608	tr|G3U0V6|G3U0V6_LOXAF	517	417	491	441	517	9e-11	77	0.126645
sp|A1L1J6|ZN652_RAT	608	tr|G3U0V6|G3U0V6_LOXAF	517	333	407	441	517	1e-09	77	0.126645
sp|A1L1J6|ZN652_RAT	608	tr|F2YID5|F2YID5_MOUSE	483	417	491	407	483	7e-11	77	0.126645
sp|A1L1J6|ZN652_RAT	608	tr|F2YID5|F2YID5_MOUSE	483	333	407	407	483	1e-09	77	0.126645
sp|A1L1J6|ZN652_RAT	608	sp|Q60793|KLF4_MOUSE	483	417	491	407	483	7e-11	77	0.126645
sp|A1L1J6|ZN652_RAT	608	sp|Q60793|KLF4_MOUSE	483	333	407	407	483	1e-09	77	0.126645
sp|A1L1J6|ZN652_RAT	608	tr|Q923V7|Q923V7_RAT	482	417	491	406	482	7e-11	77	0.126645
sp|A1L1J6|ZN652_RAT	608	tr|Q923V7|Q923V7_RAT	482	333	407	406	482	1e-09	77	0.126645
sp|A1L1J6|ZN652_RAT	608	tr|F6Q2H5|F6Q2H5_HORSE	478	417	491	402	478	1e-10	77	0.126645
sp|A1L1J6|ZN652_RAT	608	tr|F6Q2H5|F6Q2H5_HORSE	478	333	407	402	478	1e-09	77	0.126645
sp|A1L1J6|ZN652_RAT	608	sp|O43474|KLF4_HUMAN	513	417	491	437	513	1e-10	77	0.126645
sp|A1L1J6|ZN652_RAT	608	sp|O43474|KLF4_HUMAN	513	333	407	437	513	2e-09	77	0.126645
sp|A1L1J6|ZN652_RAT	608	tr|A7YWE2|A7YWE2_BOVIN	477	417	491	401	477	8e-11	77	0.126645
sp|A1L1J6|ZN652_RAT	608	tr|A7YWE2|A7YWE2_BOVIN	477	333	407	401	477	2e-09	77	0.126645
sp|A1L1J6|ZN652_RAT	608	tr|F7DQ62|F7DQ62_MONDO	507	417	491	431	507	4e-11	77	0.126645
sp|A1L1J6|ZN652_RAT	608	tr|F7DQ62|F7DQ62_MONDO	507	333	407	431	507	4e-10	77	0.126645
sp|A1L1J6|ZN652_RAT	608	tr|E1C442|E1C442_CHICK	380	333	407	304	380	3e-09	77	0.126645
sp|A1L1J6|ZN652_RAT	608	tr|E1C442|E1C442_CHICK	380	388	462	303	379	6e-08	77	0.126645
sp|A1L1J6|ZN652_RAT	608	tr|G1N2A3|G1N2A3_MELGA	249	333	407	173	249	1e-08	77	0.126645
sp|A1L1J6|ZN652_RAT	608	tr|G1N2A3|G1N2A3_MELGA	249	388	462	172	248	1e-05	77	0.126645
sp|A1L1J6|ZN652_RAT	608	tr|G1N2A3|G1N2A3_MELGA	249	302	378	172	248	0.004	77	0.126645
sp|A1L1J6|ZN652_RAT	608	tr|F7BU74|F7BU74_ORNAN	250	333	407	174	250	2e-08	77	0.126645
sp|A1L1J6|ZN652_RAT	608	tr|F7BU74|F7BU74_ORNAN	250	388	462	173	249	2e-05	77	0.126645
sp|A1L1J6|ZN652_RAT	608	tr|F7BU74|F7BU74_ORNAN	250	302	378	173	249	0.005	77	0.126645
sp|A1L1J6|ZN652_RAT	608	tr|G1K972|G1K972_ANOCA	286	333	407	210	286	2e-08	77	0.126645
sp|A1L1J6|ZN652_RAT	608	tr|Q5ZI79|Q5ZI79_CHICK	283	333	407	207	283	3e-08	77	0.126645
sp|A1L1J6|ZN652_RAT	608	tr|Q5ZI79|Q5ZI79_CHICK	283	388	462	206	282	2e-05	77	0.126645
sp|A1L1J6|ZN652_RAT	608	tr|Q5ZI79|Q5ZI79_CHICK	283	302	378	206	282	0.006	77	0.126645
sp|A1L1J6|ZN652_RAT	608	tr|G1L9N2|G1L9N2_AILME	321	333	407	245	321	3e-08	77	0.126645
sp|A1L1J6|ZN652_RAT	608	tr|G1L9N2|G1L9N2_AILME	321	302	378	244	320	0.003	77	0.126645
sp|A1L1J6|ZN652_RAT	608	tr|H0YRM0|H0YRM0_TAEGU	284	333	407	208	284	3e-08	77	0.126645
sp|A1L1J6|ZN652_RAT	608	tr|H0YRM0|H0YRM0_TAEGU	284	302	378	207	283	0.006	77	0.126645
sp|A1L1J6|ZN652_RAT	608	tr|Q8BPQ2|Q8BPQ2_MOUSE	318	333	407	242	318	3e-08	77	0.126645
sp|A1L1J6|ZN652_RAT	608	tr|Q8BPQ2|Q8BPQ2_MOUSE	318	302	378	241	317	0.003	77	0.126645
sp|A1L1J6|ZN652_RAT	608	sp|O35819|KLF6_RAT	283	333	407	207	283	2e-08	77	0.126645
sp|A1L1J6|ZN652_RAT	608	sp|O35819|KLF6_RAT	283	302	378	206	282	0.004	77	0.126645
sp|A1L1J6|ZN652_RAT	608	tr|F1PXY1|F1PXY1_CANFA	283	333	407	207	283	2e-08	77	0.126645
sp|A1L1J6|ZN652_RAT	608	tr|F1PXY1|F1PXY1_CANFA	283	302	378	206	282	0.004	77	0.126645
sp|A1L1J6|ZN652_RAT	608	sp|Q99612|KLF6_HUMAN	283	333	407	207	283	3e-08	77	0.126645
sp|A1L1J6|ZN652_RAT	608	sp|Q99612|KLF6_HUMAN	283	388	462	206	282	2e-05	77	0.126645
sp|A1L1J6|ZN652_RAT	608	sp|Q99612|KLF6_HUMAN	283	302	378	206	282	0.005	77	0.126645
sp|A1L1J6|ZN652_RAT	608	tr|B4X5Z3|B4X5Z3_PIG	283	333	407	207	283	3e-08	77	0.126645
sp|A1L1J6|ZN652_RAT	608	tr|B4X5Z3|B4X5Z3_PIG	283	302	378	206	282	0.004	77	0.126645
sp|A1L1J6|ZN652_RAT	608	tr|G3SYS9|G3SYS9_LOXAF	297	333	407	221	297	4e-08	77	0.126645
sp|A1L1J6|ZN652_RAT	608	tr|G3SYS9|G3SYS9_LOXAF	297	302	378	220	296	0.008	77	0.126645
sp|A1L1J6|ZN652_RAT	608	tr|F7DGJ3|F7DGJ3_MONDO	298	333	407	222	298	6e-08	77	0.126645
sp|A1L1J6|ZN652_RAT	608	tr|F7DGJ3|F7DGJ3_MONDO	298	302	378	221	297	0.009	77	0.126645
sp|A1L1J6|ZN652_RAT	608	tr|F6VNJ8|F6VNJ8_HORSE	303	333	407	227	303	6e-08	77	0.126645
sp|A1L1J6|ZN652_RAT	608	tr|F6VNJ8|F6VNJ8_HORSE	303	302	378	226	302	0.006	77	0.126645
sp|A1L1J6|ZN652_RAT	608	tr|Q4SN43|Q4SN43_TETNG	1990	383	458	918	993	1e-08	76	0.125
sp|A1L1J6|ZN652_RAT	608	tr|G1N2A3|G1N2A3_MELGA	249	361	434	173	248	2e-09	76	0.125
sp|A1L1J6|ZN652_RAT	608	tr|F7BU74|F7BU74_ORNAN	250	361	434	174	249	3e-09	76	0.125
sp|A1L1J6|ZN652_RAT	608	tr|G1K972|G1K972_ANOCA	286	361	434	210	285	4e-09	76	0.125
sp|A1L1J6|ZN652_RAT	608	tr|Q5ZI79|Q5ZI79_CHICK	283	361	434	207	282	4e-09	76	0.125
sp|A1L1J6|ZN652_RAT	608	tr|G1L9N2|G1L9N2_AILME	321	361	434	245	320	4e-09	76	0.125
sp|A1L1J6|ZN652_RAT	608	tr|H0YRM0|H0YRM0_TAEGU	284	361	434	208	283	4e-09	76	0.125
sp|A1L1J6|ZN652_RAT	608	tr|Q8BPQ2|Q8BPQ2_MOUSE	318	361	434	242	317	4e-09	76	0.125
sp|A1L1J6|ZN652_RAT	608	sp|O35819|KLF6_RAT	283	361	434	207	282	5e-09	76	0.125
sp|A1L1J6|ZN652_RAT	608	tr|F1PXY1|F1PXY1_CANFA	283	361	434	207	282	5e-09	76	0.125
sp|A1L1J6|ZN652_RAT	608	sp|Q99612|KLF6_HUMAN	283	361	434	207	282	6e-09	76	0.125
sp|A1L1J6|ZN652_RAT	608	tr|B4X5Z3|B4X5Z3_PIG	283	361	434	207	282	6e-09	76	0.125
sp|A1L1J6|ZN652_RAT	608	tr|G3SYS9|G3SYS9_LOXAF	297	361	434	221	296	8e-09	76	0.125
sp|A1L1J6|ZN652_RAT	608	tr|F7DGJ3|F7DGJ3_MONDO	298	361	434	222	297	1e-08	76	0.125
sp|A1L1J6|ZN652_RAT	608	tr|F6VNJ8|F6VNJ8_HORSE	303	361	434	227	302	1e-08	76	0.125
sp|A1L1J6|ZN652_RAT	608	sp|A2A884|ZEP3_MOUSE	2348	421	493	164	239	1e-06	76	0.125
sp|A1L1J6|ZN652_RAT	608	sp|Q5T1R4|ZEP3_HUMAN	2406	421	493	171	246	1e-06	76	0.125
sp|A1L1J6|ZN652_RAT	608	tr|Q4SN43|Q4SN43_TETNG	1990	412	486	919	993	4e-13	75	0.123355
sp|A1L1J6|ZN652_RAT	608	tr|Q4SN43|Q4SN43_TETNG	1990	328	402	919	993	2e-09	75	0.123355
sp|A1L1J6|ZN652_RAT	608	tr|G1N228|G1N228_MELGA	241	417	489	165	239	1e-11	75	0.123355
sp|A1L1J6|ZN652_RAT	608	tr|E1C442|E1C442_CHICK	380	417	489	304	378	6e-11	75	0.123355
sp|A1L1J6|ZN652_RAT	608	tr|G1N2A3|G1N2A3_MELGA	249	417	489	173	247	5e-08	75	0.123355
sp|A1L1J6|ZN652_RAT	608	tr|F7BU74|F7BU74_ORNAN	250	417	489	174	248	9e-08	75	0.123355
sp|A1L1J6|ZN652_RAT	608	tr|Q5ZI79|Q5ZI79_CHICK	283	417	489	207	281	6e-08	75	0.123355
sp|A1L1J6|ZN652_RAT	608	tr|G1L9N2|G1L9N2_AILME	321	417	489	245	319	1e-07	75	0.123355
sp|A1L1J6|ZN652_RAT	608	tr|H0YRM0|H0YRM0_TAEGU	284	417	489	208	282	6e-08	75	0.123355
sp|A1L1J6|ZN652_RAT	608	tr|Q8BPQ2|Q8BPQ2_MOUSE	318	417	489	242	316	1e-07	75	0.123355
sp|A1L1J6|ZN652_RAT	608	sp|O35819|KLF6_RAT	283	417	489	207	281	7e-08	75	0.123355
sp|A1L1J6|ZN652_RAT	608	tr|F1PXY1|F1PXY1_CANFA	283	417	489	207	281	9e-08	75	0.123355
sp|A1L1J6|ZN652_RAT	608	sp|Q99612|KLF6_HUMAN	283	417	489	207	281	8e-08	75	0.123355
sp|A1L1J6|ZN652_RAT	608	tr|B4X5Z3|B4X5Z3_PIG	283	417	489	207	281	9e-08	75	0.123355
sp|A1L1J6|ZN652_RAT	608	tr|G3SYS9|G3SYS9_LOXAF	297	417	489	221	295	8e-08	75	0.123355
sp|A1L1J6|ZN652_RAT	608	tr|F7DGJ3|F7DGJ3_MONDO	298	417	489	222	296	1e-07	75	0.123355
sp|A1L1J6|ZN652_RAT	608	tr|F6VNJ8|F6VNJ8_HORSE	303	417	489	227	301	3e-07	75	0.123355
sp|A1L1J6|ZN652_RAT	608	tr|D2HGI2|D2HGI2_AILME	281	417	489	207	281	9e-08	75	0.123355
sp|A1L1J6|ZN652_RAT	608	tr|D2HGI2|D2HGI2_AILME	281	361	432	207	280	2e-08	74	0.121711
sp|A1L1J6|ZN652_RAT	608	tr|D2HGI2|D2HGI2_AILME	281	333	403	207	279	1e-07	73	0.120066
sp|A1L1J6|ZN652_RAT	608	tr|D2HGI2|D2HGI2_AILME	281	302	374	206	278	0.008	73	0.120066
sp|A1L1J6|ZN652_RAT	608	tr|H0ZGK1|H0ZGK1_TAEGU	709	418	487	497	568	0.0007	72	0.118421
sp|A1L1J6|ZN652_RAT	608	tr|F7C8Q1|F7C8Q1_MONDO	1154	418	488	94	164	1e-09	71	0.116776
sp|A1L1J6|ZN652_RAT	608	sp|A2A884|ZEP3_MOUSE	2348	305	374	1697	1766	0.01	70	0.115132
sp|A1L1J6|ZN652_RAT	608	sp|Q5T1R4|ZEP3_HUMAN	2406	305	374	1731	1800	0.005	70	0.115132
sp|A1L1J6|ZN652_RAT	608	tr|F1SDE5|F1SDE5_PIG	760	421	487	348	414	2e-10	67	0.110197
sp|A1L1J6|ZN652_RAT	608	sp|Q9HBT7|ZN287_HUMAN	754	421	487	342	408	2e-10	67	0.110197
sp|A1L1J6|ZN652_RAT	608	tr|A2T7E2|A2T7E2_PANTR	594	421	487	182	248	3e-10	67	0.110197
sp|A1L1J6|ZN652_RAT	608	tr|B1NJG1|B1NJG1_ORYLA	157	503	565	83	143	0.35	64	0.105263
sp|A1L1J6|ZN652_RAT	608	sp|Q5T1R4|ZEP3_HUMAN	2406	436	490	1750	1810	0.011	61	0.100329
sp|A1L1J6|ZN652_RAT	608	sp|A2A884|ZEP3_MOUSE	2348	440	490	1720	1776	0.012	57	0.09375
sp|A1L1J6|ZN652_RAT	608	tr|Q7Z3W8|Q7Z3W8_HUMAN	58	380	434	1	57	7e-05	57	0.09375
sp|A1L1J6|ZN652_RAT	608	tr|Q7Z3W8|Q7Z3W8_HUMAN	58	324	378	1	57	0.008	57	0.09375
sp|A1L1J6|ZN652_RAT	608	tr|Q7Z3W8|Q7Z3W8_HUMAN	58	408	462	1	57	0.008	57	0.09375
sp|A1L1J6|ZN652_RAT	608	tr|Q7Z3W8|Q7Z3W8_HUMAN	58	436	489	1	56	0.0002	56	0.0921053
sp|A1L1J6|ZN652_RAT	608	tr|Q7Z3W8|Q7Z3W8_HUMAN	58	355	407	4	58	0.0001	55	0.0904605
sp|A1L1J6|ZN652_RAT	608	sp|A2A884|ZEP3_MOUSE	2348	408	461	1716	1769	0.0007	54	0.0888158
sp|A1L1J6|ZN652_RAT	608	sp|Q5T1R4|ZEP3_HUMAN	2406	408	461	1750	1803	0.0007	54	0.0888158
sp|A1L1J6|ZN652_RAT	608	sp|Q5T1R4|ZEP3_HUMAN	2406	380	433	1750	1803	0.097	54	0.0888158
sp|A1L1J6|ZN652_RAT	608	sp|A2A884|ZEP3_MOUSE	2348	327	379	184	236	0.003	53	0.0871711
sp|A1L1J6|ZN652_RAT	608	sp|Q5T1R4|ZEP3_HUMAN	2406	327	379	191	243	0.002	53	0.0871711
sp|A1L1J6|ZN652_RAT	608	sp|A2A884|ZEP3_MOUSE	2348	411	462	184	235	4e-08	52	0.0855263
sp|A1L1J6|ZN652_RAT	608	sp|Q5T1R4|ZEP3_HUMAN	2406	411	462	191	242	5e-08	52	0.0855263
sp|A1L1J6|ZN652_RAT	608	sp|A2A884|ZEP3_MOUSE	2348	356	406	185	235	0.067	51	0.0838816
sp|A1L1J6|ZN652_RAT	608	sp|A2A884|ZEP3_MOUSE	2348	384	434	185	235	0.19	51	0.0838816
sp|A1L1J6|ZN652_RAT	608	sp|Q5T1R4|ZEP3_HUMAN	2406	356	406	192	242	0.061	51	0.0838816
sp|A1L1J6|ZN652_RAT	608	sp|Q5T1R4|ZEP3_HUMAN	2406	384	434	192	242	0.19	51	0.0838816
sp|A1L1J6|ZN652_RAT	608	sp|A2A884|ZEP3_MOUSE	2348	384	433	1720	1769	0.12	50	0.0822368
sp|A1L1J6|ZN652_RAT	608	sp|Q8TD23|ZN675_HUMAN	568	438	486	142	190	5.2	49	0.0805921
sp|A1L1J6|ZN652_RAT	608	tr|Q4SN43|Q4SN43_TETNG	1990	439	487	918	966	3e-05	49	0.0805921
sp|A1L1J6|ZN652_RAT	608	tr|B2GUV8|B2GUV8_RAT	707	440	487	519	566	0.001	48	0.0789474
sp|A1L1J6|ZN652_RAT	608	tr|E1B8E6|E1B8E6_BOVIN	706	440	487	518	565	0.001	48	0.0789474
sp|A1L1J6|ZN652_RAT	608	tr|F7AXS6|F7AXS6_HORSE	707	440	487	519	566	0.001	48	0.0789474
sp|A1L1J6|ZN652_RAT	608	tr|Q5RB65|Q5RB65_PONAB	706	440	487	518	565	0.001	48	0.0789474
sp|A1L1J6|ZN652_RAT	608	sp|P41182|BCL6_HUMAN	706	440	487	518	565	0.001	48	0.0789474
sp|A1L1J6|ZN652_RAT	608	tr|Q544F9|Q544F9_MOUSE	707	440	487	519	566	0.001	48	0.0789474
sp|A1L1J6|ZN652_RAT	608	sp|P41183|BCL6_MOUSE	707	440	487	519	566	0.001	48	0.0789474
sp|A1L1J6|ZN652_RAT	608	sp|Q5ZM39|BCL6_CHICK	708	440	487	520	567	0.001	48	0.0789474
sp|A1L1J6|ZN652_RAT	608	tr|F1NBN7|F1NBN7_CHICK	708	440	487	520	567	0.001	48	0.0789474
sp|A1L1J6|ZN652_RAT	608	tr|F6XMD7|F6XMD7_ORNAN	713	440	487	524	571	0.0009	48	0.0789474
sp|A1L1J6|ZN652_RAT	608	tr|G3T952|G3T952_LOXAF	708	440	487	518	565	0.001	48	0.0789474
sp|A1L1J6|ZN652_RAT	608	sp|A2A884|ZEP3_MOUSE	2348	356	403	1720	1767	0.023	48	0.0789474
sp|A1L1J6|ZN652_RAT	608	sp|Q5T1R4|ZEP3_HUMAN	2406	356	403	1754	1801	0.021	48	0.0789474
sp|A1L1J6|ZN652_RAT	608	tr|A1XSY9|A1XSY9_PIG	37	426	460	1	37	0.053	37	0.0608553
sp|A1L1J6|ZN652_RAT	608	tr|A1XSY9|A1XSY9_PIG	37	454	486	1	35	0.003	35	0.0575658
sp|A1L1J6|ZN652_RAT	608	tr|A1XSY9|A1XSY9_PIG	37	342	374	1	35	3.1	35	0.0575658
sp|A1L1J6|ZN652_RAT	608	tr|A1XSY9|A1XSY9_PIG	37	371	402	2	35	7	34	0.0559211
sp|A1L1J6|ZN652_RAT 最大值										0.527961
sp|A1L272|S29A4_DANRE	518	sp|Q6UXL0|I20RB_HUMAN	311	375	420	228	272	2.8	47	0.0907336
sp|A1L272|S29A4_DANRE 最大值										0.0907336
sp|A1L3L1|PTR1B_XENLA	431	tr|Q541Z2|Q541Z2_MOUSE	377	81	245	107	246	0.0009	173	0.401392
sp|A1L3L1|PTR1B_XENLA	431	sp|Q61239|FNTA_MOUSE	377	81	245	107	246	0.0009	173	0.401392
sp|A1L3L1|PTR1B_XENLA	431	sp|Q04631|FNTA_RAT	377	81	245	107	246	0.002	173	0.401392
sp|A1L3L1|PTR1B_XENLA	431	sp|Q13421|MSLN_HUMAN	630	140	214	317	379	7.5	75	0.174014
sp|A1L3L1|PTR1B_XENLA	431	sp|O62678|IL16_AOTTR	632	215	286	279	331	2.5	72	0.167053
sp|A1L3L1|PTR1B_XENLA	431	sp|O62666|IL16_PANTR	631	215	276	278	320	2.2	62	0.143852
sp|A1L3L1|PTR1B_XENLA	431	sp|Q14005|IL16_HUMAN	1332	215	276	979	1021	2.2	62	0.143852
sp|A1L3L1|PTR1B_XENLA 最大值										0.401392
sp|A1L520|ARFG2_BOVIN	520	sp|A2A884|ZEP3_MOUSE	2348	231	321	1394	1488	3.6	98	0.188462
sp|A1L520|ARFG2_BOVIN	520	tr|G3TPJ1|G3TPJ1_LOXAF	1139	48	113	605	679	2.3	76	0.146154
sp|A1L520|ARFG2_BOVIN	520	sp|Q8WX94|NALP7_HUMAN	980	384	450	580	648	0.58	69	0.132692
sp|A1L520|ARFG2_BOVIN 最大值										0.188462
sp|A1RNN6|CH60_SHESW	545	tr|F6Z587|F6Z587_HORSE	575	3	526	27	553	0	527	0.966972
sp|A1RNN6|CH60_SHESW	545	tr|F1SMZ7|F1SMZ7_PIG	575	3	526	27	553	0	527	0.966972
sp|A1RNN6|CH60_SHESW	545	sp|P63038|CH60_MOUSE	573	3	526	27	551	0	525	0.963303
sp|A1RNN6|CH60_SHESW	545	sp|P10809|CH60_HUMAN	573	3	526	27	551	0	525	0.963303
sp|A1RNN6|CH60_SHESW	545	tr|F6PQQ8|F6PQQ8_MONDO	573	3	526	27	551	0	525	0.963303
sp|A1RNN6|CH60_SHESW	545	tr|F1MUZ9|F1MUZ9_BOVIN	573	3	526	27	551	0	525	0.963303
sp|A1RNN6|CH60_SHESW	545	tr|G9F6X6|G9F6X6_PIG	573	3	526	27	551	0	525	0.963303
sp|A1RNN6|CH60_SHESW	545	tr|G1LTM3|G1LTM3_AILME	240	4	209	25	227	3e-43	206	0.377982
sp|A1RNN6|CH60_SHESW	545	tr|G3TZG9|G3TZG9_LOXAF	171	16	206	3	168	1e-41	192	0.352294
sp|A1RNN6|CH60_SHESW	545	tr|D3Z2F2|D3Z2F2_MOUSE	202	3	178	27	202	2e-62	176	0.322936
sp|A1RNN6|CH60_SHESW	545	tr|D3Z7J9|D3Z7J9_MOUSE	142	3	118	27	142	4e-41	116	0.212844
sp|A1RNN6|CH60_SHESW	545	tr|Q5UES3|Q5UES3_PIG	116	16	129	3	116	2e-38	114	0.209174
sp|A1RNN6|CH60_SHESW	545	tr|H3A4R1|H3A4R1_LATCH	1011	351	431	302	382	5	82	0.150459
sp|A1RNN6|CH60_SHESW	545	tr|F5GY90|F5GY90_HUMAN	187	126	190	20	76	3.2	66	0.121101
sp|A1RNN6|CH60_SHESW	545	sp|P08397|HEM3_HUMAN	361	126	190	37	93	9.7	66	0.121101
sp|A1RNN6|CH60_SHESW	545	tr|A6MK13|A6MK13_CALJA	83	469	526	4	61	2e-08	58	0.106422
sp|A1RNN6|CH60_SHESW	545	tr|H3BGX0|H3BGX0_LATCH	667	488	532	484	529	7.1	46	0.0844037
sp|A1RNN6|CH60_SHESW	545	tr|H3BGW9|H3BGW9_LATCH	826	488	532	484	529	7.9	46	0.0844037
sp|A1RNN6|CH60_SHESW 最大值										0.966972
sp|A1RVX2|EF2_PYRIL	740	sp|P62630|EF1A1_RAT	462	31	184	13	179	5e-05	177	0.239189
sp|A1RVX2|EF2_PYRIL	740	sp|P10126|EF1A1_MOUSE	462	31	184	13	179	5e-05	177	0.239189
sp|A1RVX2|EF2_PYRIL	740	sp|P62629|EF1A1_CRIGR	462	31	184	13	179	5e-05	177	0.239189
sp|A1RVX2|EF2_PYRIL	740	sp|P68105|EF1A1_RABIT	462	31	184	13	179	6e-05	177	0.239189
sp|A1RVX2|EF2_PYRIL	740	sp|Q5R4R8|EF1A1_PONAB	462	31	184	13	179	6e-05	177	0.239189
sp|A1RVX2|EF2_PYRIL	740	sp|Q5R1X2|EF1A1_PANTR	462	31	184	13	179	6e-05	177	0.239189
sp|A1RVX2|EF2_PYRIL	740	sp|P68104|EF1A1_HUMAN	462	31	184	13	179	6e-05	177	0.239189
sp|A1RVX2|EF2_PYRIL	740	sp|Q66RN5|EF1A1_FELCA	462	31	184	13	179	6e-05	177	0.239189
sp|A1RVX2|EF2_PYRIL	740	sp|P68103|EF1A1_BOVIN	462	31	184	13	179	6e-05	177	0.239189
sp|A1RVX2|EF2_PYRIL	740	sp|A2Q0Z0|EF1A1_HORSE	462	31	184	13	179	6e-05	177	0.239189
sp|A1RVX2|EF2_PYRIL	740	tr|Q800W9|Q800W9_CYPCA	462	31	184	13	179	0.001	177	0.239189
sp|A1RVX2|EF2_PYRIL 最大值										0.239189
sp|A1SAC0|CH60_SHEAM	545	tr|F6Z587|F6Z587_HORSE	575	3	526	27	553	2e-180	527	0.966972
sp|A1SAC0|CH60_SHEAM	545	tr|F1SMZ7|F1SMZ7_PIG	575	3	526	27	553	9e-180	527	0.966972
sp|A1SAC0|CH60_SHEAM	545	sp|P63038|CH60_MOUSE	573	3	526	27	551	0	525	0.963303
sp|A1SAC0|CH60_SHEAM	545	sp|P10809|CH60_HUMAN	573	3	526	27	551	0	525	0.963303
sp|A1SAC0|CH60_SHEAM	545	tr|F1MUZ9|F1MUZ9_BOVIN	573	3	526	27	551	0	525	0.963303
sp|A1SAC0|CH60_SHEAM	545	tr|F6PQQ8|F6PQQ8_MONDO	573	3	526	27	551	0	525	0.963303
sp|A1SAC0|CH60_SHEAM	545	tr|G9F6X6|G9F6X6_PIG	573	3	526	27	551	4e-179	525	0.963303
sp|A1SAC0|CH60_SHEAM	545	tr|G1LTM3|G1LTM3_AILME	240	4	209	25	227	1e-42	206	0.377982
sp|A1SAC0|CH60_SHEAM	545	tr|G3TZG9|G3TZG9_LOXAF	171	16	206	3	168	4e-40	192	0.352294
sp|A1SAC0|CH60_SHEAM	545	tr|D3Z2F2|D3Z2F2_MOUSE	202	3	178	27	202	2e-60	176	0.322936
sp|A1SAC0|CH60_SHEAM	545	tr|H3BGX0|H3BGX0_LATCH	667	410	532	410	529	0.87	127	0.233028
sp|A1SAC0|CH60_SHEAM	545	tr|H3BGW9|H3BGW9_LATCH	826	410	532	413	529	1.3	124	0.227523
sp|A1SAC0|CH60_SHEAM	545	tr|D3Z7J9|D3Z7J9_MOUSE	142	3	118	27	142	3e-41	116	0.212844
sp|A1SAC0|CH60_SHEAM	545	tr|Q5UES3|Q5UES3_PIG	116	16	128	3	115	3e-38	113	0.207339
sp|A1SAC0|CH60_SHEAM	545	sp|P08397|HEM3_HUMAN	361	157	235	58	138	6.4	85	0.155963
sp|A1SAC0|CH60_SHEAM	545	sp|P22907|HEM3_MOUSE	361	157	235	58	138	9.5	85	0.155963
sp|A1SAC0|CH60_SHEAM	545	tr|Q3UBC6|Q3UBC6_MOUSE	360	157	235	58	138	9.6	85	0.155963
sp|A1SAC0|CH60_SHEAM	545	tr|A6MK13|A6MK13_CALJA	83	469	526	4	61	5e-09	58	0.106422
sp|A1SAC0|CH60_SHEAM	545	tr|F5GY90|F5GY90_HUMAN	187	157	190	41	76	5	36	0.066055
sp|A1SAC0|CH60_SHEAM	545	tr|A5HU05|A5HU05_PIG	166	155	183	90	118	5.6	29	0.053211
sp|A1SAC0|CH60_SHEAM	545	tr|C8CKA7|C8CKA7_PIG	189	155	183	113	141	6.3	29	0.053211
sp|A1SAC0|CH60_SHEAM 最大值										0.966972
sp|A1TKQ5|CH60_ACIAC	545	tr|F6Z587|F6Z587_HORSE	575	3	528	27	555	0	530	0.972477
sp|A1TKQ5|CH60_ACIAC	545	tr|F1SMZ7|F1SMZ7_PIG	575	3	528	27	555	0	529	0.970642
sp|A1TKQ5|CH60_ACIAC	545	sp|P63038|CH60_MOUSE	573	3	528	27	553	0	527	0.966972
sp|A1TKQ5|CH60_ACIAC	545	tr|F1MUZ9|F1MUZ9_BOVIN	573	3	528	27	553	0	527	0.966972
sp|A1TKQ5|CH60_ACIAC	545	sp|P10809|CH60_HUMAN	573	3	528	27	553	0	527	0.966972
sp|A1TKQ5|CH60_ACIAC	545	tr|F6PQQ8|F6PQQ8_MONDO	573	3	528	27	553	0	527	0.966972
sp|A1TKQ5|CH60_ACIAC	545	tr|G9F6X6|G9F6X6_PIG	573	3	528	27	553	0	527	0.966972
sp|A1TKQ5|CH60_ACIAC	545	tr|G1LTM3|G1LTM3_AILME	240	4	215	25	233	5e-50	212	0.388991
sp|A1TKQ5|CH60_ACIAC	545	tr|G3TZG9|G3TZG9_LOXAF	171	14	206	1	168	1e-46	194	0.355963
sp|A1TKQ5|CH60_ACIAC	545	tr|D3Z2F2|D3Z2F2_MOUSE	202	3	178	27	202	2e-66	176	0.322936
sp|A1TKQ5|CH60_ACIAC	545	tr|D3Z7J9|D3Z7J9_MOUSE	142	3	118	27	142	4e-42	116	0.212844
sp|A1TKQ5|CH60_ACIAC	545	tr|Q5UES3|Q5UES3_PIG	116	14	129	1	116	2e-39	116	0.212844
sp|A1TKQ5|CH60_ACIAC	545	tr|H3A4R1|H3A4R1_LATCH	1011	326	430	276	383	2.6	108	0.198165
sp|A1TKQ5|CH60_ACIAC	545	tr|A6MK13|A6MK13_CALJA	83	466	528	1	63	2e-10	63	0.115596
sp|A1TKQ5|CH60_ACIAC 最大值										0.972477
sp|A1TUZ5|DTD_ACIAC	155	sp|P0CG47|UBB_HUMAN	229	100	153	51	101	0.046	54	0.348387
sp|A1TUZ5|DTD_ACIAC	155	sp|P0CG47|UBB_HUMAN	229	100	153	127	177	0.046	54	0.348387
sp|A1TUZ5|DTD_ACIAC	155	sp|P0CG48|UBC_HUMAN	685	100	153	51	101	0.51	54	0.348387
sp|A1TUZ5|DTD_ACIAC	155	sp|P0CG48|UBC_HUMAN	685	100	153	127	177	0.51	54	0.348387
sp|A1TUZ5|DTD_ACIAC	155	sp|P0CG48|UBC_HUMAN	685	100	153	203	253	0.51	54	0.348387
sp|A1TUZ5|DTD_ACIAC	155	sp|P0CG48|UBC_HUMAN	685	100	153	279	329	0.51	54	0.348387
sp|A1TUZ5|DTD_ACIAC	155	sp|P0CG48|UBC_HUMAN	685	100	153	355	405	0.51	54	0.348387
sp|A1TUZ5|DTD_ACIAC	155	sp|P0CG48|UBC_HUMAN	685	100	153	431	481	0.51	54	0.348387
sp|A1TUZ5|DTD_ACIAC	155	sp|P0CG48|UBC_HUMAN	685	100	153	507	557	0.51	54	0.348387
sp|A1TUZ5|DTD_ACIAC	155	sp|P0CG48|UBC_HUMAN	685	100	153	583	633	0.51	54	0.348387
sp|A1TUZ5|DTD_ACIAC 最大值										0.348387
sp|A1U292|CH60_MARAV	550	tr|F1SMZ7|F1SMZ7_PIG	575	3	529	27	556	0	532	0.967273
sp|A1U292|CH60_MARAV	550	tr|F6Z587|F6Z587_HORSE	575	3	529	27	556	0	531	0.965455
sp|A1U292|CH60_MARAV	550	sp|P63038|CH60_MOUSE	573	3	529	27	554	0	528	0.96
sp|A1U292|CH60_MARAV	550	sp|P10809|CH60_HUMAN	573	3	529	27	554	0	528	0.96
sp|A1U292|CH60_MARAV	550	tr|F6PQQ8|F6PQQ8_MONDO	573	3	529	27	554	0	528	0.96
sp|A1U292|CH60_MARAV	550	tr|F1MUZ9|F1MUZ9_BOVIN	573	3	529	27	554	0	528	0.96
sp|A1U292|CH60_MARAV	550	tr|G9F6X6|G9F6X6_PIG	573	3	529	27	554	0	528	0.96
sp|A1U292|CH60_MARAV	550	tr|G1LTM3|G1LTM3_AILME	240	4	209	25	227	3e-40	206	0.374545
sp|A1U292|CH60_MARAV	550	tr|G3TZG9|G3TZG9_LOXAF	171	16	206	3	168	1e-39	192	0.349091
sp|A1U292|CH60_MARAV	550	tr|D3Z2F2|D3Z2F2_MOUSE	202	3	178	27	202	5e-62	176	0.32
sp|A1U292|CH60_MARAV	550	tr|D3Z7J9|D3Z7J9_MOUSE	142	3	118	27	142	1e-43	116	0.210909
sp|A1U292|CH60_MARAV	550	tr|Q5UES3|Q5UES3_PIG	116	16	120	3	107	1e-39	105	0.190909
sp|A1U292|CH60_MARAV	550	tr|A6MK13|A6MK13_CALJA	83	466	529	1	64	1e-07	64	0.116364
sp|A1U292|CH60_MARAV 最大值										0.967273
sp|A1US11|THIC_BARBK	611	sp|Q60611|SATB1_MOUSE	764	445	520	119	196	8.6	78	0.12766
sp|A1US11|THIC_BARBK 最大值										0.12766
sp|A1UT20|GATA_BARBK	494	tr|A7SRV3|A7SRV3_NEMVE	552	235	465	25	235	4e-07	240	0.48583
sp|A1UT20|GATA_BARBK	494	sp|Q95M53|TLR2_MACFA	784	40	141	10	123	3	114	0.230769
sp|A1UT20|GATA_BARBK	494	sp|Q9UII4|HERC5_HUMAN	1024	148	222	238	321	1.3	85	0.172065
sp|A1UT20|GATA_BARBK	494	sp|B3Y613|TLR2_PANTR	784	40	95	10	67	3	58	0.117409
sp|A1UT20|GATA_BARBK	494	sp|B3Y614|TLR2_PANPA	784	40	95	10	67	3.1	58	0.117409
sp|A1UT20|GATA_BARBK	494	sp|O60603|TLR2_HUMAN	784	40	95	10	67	3.1	58	0.117409
sp|A1UT20|GATA_BARBK	494	sp|B3Y615|TLR2_GORGO	784	40	95	10	67	3.1	58	0.117409
sp|A1UT20|GATA_BARBK 最大值										0.48583
sp|A1UTQ0|Y1091_BARBK	305	sp|P48967|MPIP3_MOUSE	447	113	206	277	388	0.96	114	0.37377
sp|A1UTQ0|Y1091_BARBK	305	sp|P52632|STA5B_RAT	786	29	137	299	392	4	109	0.357377
sp|A1UTQ0|Y1091_BARBK	305	tr|Q7TQ93|Q7TQ93_PERMA	61	46	90	8	59	1	52	0.170492
sp|A1UTQ0|Y1091_BARBK	305	tr|F7BHT6|F7BHT6_MONDO	853	79	123	571	619	4.4	50	0.163934
sp|A1UTQ0|Y1091_BARBK 最大值										0.37377
sp|A1VAJ5|RPOC_DESVV	1385	tr|H1A4F3|H1A4F3_TAEGU	701	1232	1368	282	405	4.1	137	0.098917
sp|A1VAJ5|RPOC_DESVV	1385	tr|G3U2E4|G3U2E4_LOXAF	105	169	240	41	102	8.7	75	0.0541516
sp|A1VAJ5|RPOC_DESVV 最大值										0.098917
sp|A1VCQ0|CH60_DESVV	547	tr|F6Z587|F6Z587_HORSE	575	3	530	27	557	0	531	0.97075
sp|A1VCQ0|CH60_DESVV	547	tr|F1SMZ7|F1SMZ7_PIG	575	3	530	27	557	0	531	0.97075
sp|A1VCQ0|CH60_DESVV	547	sp|P63038|CH60_MOUSE	573	3	530	27	555	0	529	0.967093
sp|A1VCQ0|CH60_DESVV	547	sp|P10809|CH60_HUMAN	573	3	530	27	555	0	529	0.967093
sp|A1VCQ0|CH60_DESVV	547	tr|F6PQQ8|F6PQQ8_MONDO	573	3	530	27	555	0	529	0.967093
sp|A1VCQ0|CH60_DESVV	547	tr|F1MUZ9|F1MUZ9_BOVIN	573	3	530	27	555	0	529	0.967093
sp|A1VCQ0|CH60_DESVV	547	tr|G9F6X6|G9F6X6_PIG	573	3	530	27	555	0	529	0.967093
sp|A1VCQ0|CH60_DESVV	547	tr|G1LTM3|G1LTM3_AILME	240	3	209	24	227	1e-37	207	0.378428
sp|A1VCQ0|CH60_DESVV	547	tr|G3TZG9|G3TZG9_LOXAF	171	18	206	5	168	3e-39	190	0.347349
sp|A1VCQ0|CH60_DESVV	547	tr|D3Z2F2|D3Z2F2_MOUSE	202	3	178	27	202	5e-58	176	0.321755
sp|A1VCQ0|CH60_DESVV	547	tr|H2M8M4|H2M8M4_ORYLA	293	267	382	2	118	0.021	120	0.219378
sp|A1VCQ0|CH60_DESVV	547	tr|D3Z7J9|D3Z7J9_MOUSE	142	3	118	27	142	5e-37	116	0.212066
sp|A1VCQ0|CH60_DESVV	547	tr|Q5UES3|Q5UES3_PIG	116	18	128	5	115	2e-37	111	0.202925
sp|A1VCQ0|CH60_DESVV	547	tr|G3W289|G3W289_SARHA	191	48	143	52	142	0.22	96	0.175503
sp|A1VCQ0|CH60_DESVV	547	sp|P33709|EPO_SHEEP	194	52	143	58	144	0.57	93	0.170018
sp|A1VCQ0|CH60_DESVV	547	tr|A6MK13|A6MK13_CALJA	83	466	530	1	65	2e-10	65	0.11883
sp|A1VCQ0|CH60_DESVV	547	tr|F6U769|F6U769_MONDO	172	85	143	66	123	0.098	59	0.107861
sp|A1VCQ0|CH60_DESVV	547	tr|F6WUU2|F6WUU2_MONDO	192	85	143	86	143	0.12	59	0.107861
sp|A1VCQ0|CH60_DESVV 最大值										0.97075
sp|A1VJZ8|CH602_POLNA	549	tr|F6Z587|F6Z587_HORSE	575	3	528	27	555	0	529	0.96357
sp|A1VJZ8|CH602_POLNA	549	tr|F1SMZ7|F1SMZ7_PIG	575	3	528	27	555	0	529	0.96357
sp|A1VJZ8|CH602_POLNA	549	sp|P63038|CH60_MOUSE	573	3	528	27	553	0	527	0.959927
sp|A1VJZ8|CH602_POLNA	549	sp|P10809|CH60_HUMAN	573	3	528	27	553	0	527	0.959927
sp|A1VJZ8|CH602_POLNA	549	tr|F1MUZ9|F1MUZ9_BOVIN	573	3	528	27	553	0	527	0.959927
sp|A1VJZ8|CH602_POLNA	549	tr|F6PQQ8|F6PQQ8_MONDO	573	3	528	27	553	0	527	0.959927
sp|A1VJZ8|CH602_POLNA	549	tr|G9F6X6|G9F6X6_PIG	573	3	528	27	553	0	527	0.959927
sp|A1VJZ8|CH602_POLNA	549	tr|G1LTM3|G1LTM3_AILME	240	4	215	25	233	1e-48	212	0.386157
sp|A1VJZ8|CH602_POLNA	549	tr|G3TZG9|G3TZG9_LOXAF	171	14	206	1	168	1e-44	194	0.35337
sp|A1VJZ8|CH602_POLNA	549	tr|D3Z2F2|D3Z2F2_MOUSE	202	3	178	27	202	3e-65	176	0.320583
sp|A1VJZ8|CH602_POLNA	549	tr|D3Z7J9|D3Z7J9_MOUSE	142	3	118	27	142	1e-41	116	0.211293
sp|A1VJZ8|CH602_POLNA	549	tr|Q5UES3|Q5UES3_PIG	116	14	128	1	115	1e-38	115	0.209472
sp|A1VJZ8|CH602_POLNA	549	tr|A6MK13|A6MK13_CALJA	83	466	528	1	63	5e-09	63	0.114754
sp|A1VJZ8|CH602_POLNA 最大值										0.96357
sp|A1WV00|PYRC_HALHL	345	tr|Q0PHM5|Q0PHM5_9CICH	632	64	160	302	407	2.6	107	0.310145
sp|A1WV00|PYRC_HALHL	345	tr|F1M495|F1M495_RAT	1423	259	327	50	119	1.1	71	0.205797
sp|A1WV00|PYRC_HALHL	345	tr|F1LUZ3|F1LUZ3_RAT	1462	259	327	87	156	1.1	71	0.205797
sp|A1WV00|PYRC_HALHL 最大值										0.310145
sp|A1X283|SPD2B_HUMAN	911	sp|Q06187|BTK_HUMAN	659	132	282	192	327	8.5	155	0.170143
sp|A1X283|SPD2B_HUMAN	911	sp|P35991|BTK_MOUSE	659	154	282	216	327	1.1	131	0.143798
sp|A1X283|SPD2B_HUMAN	911	sp|Q9R1Z8|VINEX_MOUSE	733	162	278	454	577	0.008	126	0.13831
sp|A1X283|SPD2B_HUMAN	911	sp|P05480|SRC_MOUSE	541	797	907	51	145	0.33	118	0.129528
sp|A1X283|SPD2B_HUMAN	911	tr|Q8TD76|Q8TD76_HUMAN	197	200	283	80	161	7.1	89	0.0976948
sp|A1X283|SPD2B_HUMAN	911	tr|P78453|P78453_HUMAN	177	191	275	56	133	0.017	87	0.0954995
sp|A1X283|SPD2B_HUMAN	911	tr|Q5TGY6|Q5TGY6_HUMAN	313	191	275	56	133	0.06	87	0.0954995
sp|A1X283|SPD2B_HUMAN	911	sp|P09769|FGR_HUMAN	529	191	275	56	133	0.075	87	0.0954995
sp|A1X283|SPD2B_HUMAN	911	sp|Q03526|ITK_MOUSE	625	359	422	157	232	7.3	76	0.0834248
sp|A1X283|SPD2B_HUMAN	911	sp|Q92783|STAM1_HUMAN	540	160	230	218	284	3.9	73	0.0801317
sp|A1X283|SPD2B_HUMAN	911	sp|Q1JPZ3|SRC_DANRE	534	841	907	71	138	0.07	70	0.0768386
sp|A1X283|SPD2B_HUMAN	911	sp|Q922K9|FRK_MOUSE	512	155	221	52	121	0.24	70	0.0768386
sp|A1X283|SPD2B_HUMAN	911	tr|F7B0Y1|F7B0Y1_MONDO	513	216	281	59	126	0.01	69	0.0757409
sp|A1X283|SPD2B_HUMAN	911	sp|P19174|PLCG1_HUMAN	1290	160	224	799	861	2.6	66	0.0724479
sp|A1X283|SPD2B_HUMAN	911	tr|H0ZLG0|H0ZLG0_TAEGU	513	216	277	57	121	0.19	66	0.0724479
sp|A1X283|SPD2B_HUMAN	911	sp|P12931|SRC_HUMAN	536	845	907	81	140	0.012	64	0.0702525
sp|A1X283|SPD2B_HUMAN	911	sp|Q9WUD9|SRC_RAT	536	845	907	81	140	0.012	64	0.0702525
sp|A1X283|SPD2B_HUMAN	911	tr|F6X6I5|F6X6I5_ORNAN	514	217	277	60	122	0.03	64	0.0702525
sp|A1X283|SPD2B_HUMAN	911	sp|Q03526|ITK_MOUSE	625	217	279	173	236	0.11	64	0.0702525
sp|A1X283|SPD2B_HUMAN	911	sp|Q922K9|FRK_MOUSE	512	224	278	52	115	0.17	64	0.0702525
sp|A1X283|SPD2B_HUMAN	911	tr|F1NL66|F1NL66_CHICK	212	221	277	39	100	0.002	63	0.0691548
sp|A1X283|SPD2B_HUMAN	911	tr|F1NUU2|F1NUU2_CHICK	492	221	277	39	100	0.008	63	0.0691548
sp|A1X283|SPD2B_HUMAN	911	sp|Q92783|STAM1_HUMAN	540	221	282	210	272	0.89	63	0.0691548
sp|A1X283|SPD2B_HUMAN	911	sp|Q80XI6|M3K11_MOUSE	850	226	282	47	108	0.0003	62	0.0680571
sp|A1X283|SPD2B_HUMAN	911	sp|Q66HA1|M3K11_RAT	850	226	282	47	108	0.0003	62	0.0680571
sp|A1X283|SPD2B_HUMAN	911	sp|Q16584|M3K11_HUMAN	847	226	282	46	107	0.0003	62	0.0680571
sp|A1X283|SPD2B_HUMAN	911	tr|E5RJ37|E5RJ37_HUMAN	150	220	277	61	120	0.016	61	0.0669594
sp|A1X283|SPD2B_HUMAN	911	sp|P07948|LYN_HUMAN	512	220	277	61	120	0.096	61	0.0669594
sp|A1X283|SPD2B_HUMAN	911	tr|F1N261|F1N261_BOVIN	512	220	277	61	120	0.21	61	0.0669594
sp|A1X283|SPD2B_HUMAN	911	sp|Q07014|LYN_RAT	512	220	277	61	120	0.25	61	0.0669594
sp|A1X283|SPD2B_HUMAN	911	tr|Q3TCS3|Q3TCS3_MOUSE	512	220	277	61	120	0.26	61	0.0669594
sp|A1X283|SPD2B_HUMAN	911	sp|P25911|LYN_MOUSE	512	220	277	61	120	0.26	61	0.0669594
sp|A1X283|SPD2B_HUMAN	911	tr|G3T0P1|G3T0P1_LOXAF	512	220	277	61	120	0.27	61	0.0669594
sp|A1X283|SPD2B_HUMAN	911	tr|F1RT53|F1RT53_PIG	513	220	277	61	120	0.31	61	0.0669594
sp|A1X283|SPD2B_HUMAN	911	tr|G1L4Q2|G1L4Q2_AILME	512	220	277	61	120	0.51	61	0.0669594
sp|A1X283|SPD2B_HUMAN	911	tr|F7AQZ6|F7AQZ6_HORSE	512	220	277	61	120	0.57	61	0.0669594
sp|A1X283|SPD2B_HUMAN	911	tr|D2HNX1|D2HNX1_AILME	453	220	277	2	61	0.74	61	0.0669594
sp|A1X283|SPD2B_HUMAN	911	sp|P42680|TEC_HUMAN	631	852	910	181	237	1.7	60	0.0658617
sp|A1X283|SPD2B_HUMAN	911	tr|F7B0Y1|F7B0Y1_MONDO	513	851	909	65	121	0.77	60	0.0658617
sp|A1X283|SPD2B_HUMAN	911	sp|Q8JH64|BTK_CHICK	657	222	280	212	271	0.12	60	0.0658617
sp|A1X283|SPD2B_HUMAN	911	sp|P42681|TXK_HUMAN	527	220	278	81	140	7.6	60	0.0658617
sp|A1X283|SPD2B_HUMAN	911	sp|Q08881|ITK_HUMAN	620	222	279	172	230	0.14	59	0.064764
sp|A1X283|SPD2B_HUMAN	911	sp|Q922K9|FRK_MOUSE	512	855	907	54	112	0.81	59	0.064764
sp|A1X283|SPD2B_HUMAN	911	sp|P35991|BTK_MOUSE	659	218	275	211	269	0.64	59	0.064764
sp|A1X283|SPD2B_HUMAN	911	sp|P24604|TEC_MOUSE	630	854	910	182	236	0.87	58	0.0636663
sp|A1X283|SPD2B_HUMAN	911	tr|F1NL66|F1NL66_CHICK	212	854	909	47	100	2.9	57	0.0625686
sp|A1X283|SPD2B_HUMAN	911	tr|F1NUU2|F1NUU2_CHICK	492	854	909	47	100	6.7	57	0.0625686
sp|A1X283|SPD2B_HUMAN	911	tr|F7B0Y1|F7B0Y1_MONDO	513	370	424	66	121	5.8	57	0.0625686
sp|A1X283|SPD2B_HUMAN	911	tr|E5RJ37|E5RJ37_HUMAN	150	854	909	67	120	2.2	57	0.0625686
sp|A1X283|SPD2B_HUMAN	911	sp|Q60631|GRB2_MOUSE	217	856	911	4	57	1.6	57	0.0625686
sp|A1X283|SPD2B_HUMAN	911	tr|F6X6I5|F6X6I5_ORNAN	514	854	909	69	122	1	57	0.0625686
sp|A1X283|SPD2B_HUMAN	911	sp|P07948|LYN_HUMAN	512	854	909	67	120	8.5	57	0.0625686
sp|A1X283|SPD2B_HUMAN	911	tr|H0ZLG0|H0ZLG0_TAEGU	513	854	909	68	121	5.7	57	0.0625686
sp|A1X283|SPD2B_HUMAN	911	tr|F1N261|F1N261_BOVIN	512	854	909	67	120	4.1	57	0.0625686
sp|A1X283|SPD2B_HUMAN	911	sp|Q07014|LYN_RAT	512	854	909	67	120	1.9	57	0.0625686
sp|A1X283|SPD2B_HUMAN	911	tr|Q3TCS3|Q3TCS3_MOUSE	512	854	909	67	120	2	57	0.0625686
sp|A1X283|SPD2B_HUMAN	911	sp|P25911|LYN_MOUSE	512	854	909	67	120	2	57	0.0625686
sp|A1X283|SPD2B_HUMAN	911	tr|G3T0P1|G3T0P1_LOXAF	512	854	909	67	120	2.2	57	0.0625686
sp|A1X283|SPD2B_HUMAN	911	tr|F1RT53|F1RT53_PIG	513	854	909	67	120	3.2	57	0.0625686
sp|A1X283|SPD2B_HUMAN	911	tr|G1L4Q2|G1L4Q2_AILME	512	854	909	67	120	7.3	57	0.0625686
sp|A1X283|SPD2B_HUMAN	911	tr|F7AQZ6|F7AQZ6_HORSE	512	854	909	67	120	2.2	57	0.0625686
sp|A1X283|SPD2B_HUMAN	911	sp|Q60631|GRB2_MOUSE	217	220	275	155	210	3.3	56	0.0614709
sp|A1X283|SPD2B_HUMAN	911	sp|Q922K9|FRK_MOUSE	512	361	415	41	96	0.38	56	0.0614709
sp|A1X283|SPD2B_HUMAN	911	sp|P42680|TEC_HUMAN	631	158	209	183	237	1	55	0.0603732
sp|A1X283|SPD2B_HUMAN	911	sp|P24604|TEC_MOUSE	630	158	209	182	236	0.59	55	0.0603732
sp|A1X283|SPD2B_HUMAN	911	sp|Q06187|BTK_HUMAN	659	222	275	215	269	1.4	55	0.0603732
sp|A1X283|SPD2B_HUMAN	911	sp|P42680|TEC_HUMAN	631	223	275	181	234	0.008	54	0.0592755
sp|A1X283|SPD2B_HUMAN	911	sp|P27870|VAV_MOUSE	845	230	281	791	843	2e-05	53	0.0581778
sp|A1X283|SPD2B_HUMAN	911	sp|Q9R1Z8|VINEX_MOUSE	733	226	275	679	730	0.26	52	0.0570801
sp|A1X283|SPD2B_HUMAN	911	sp|P12931|SRC_HUMAN	536	226	275	89	140	1.6	52	0.0570801
sp|A1X283|SPD2B_HUMAN	911	sp|Q9WUD9|SRC_RAT	536	226	275	89	140	1.5	52	0.0570801
sp|A1X283|SPD2B_HUMAN	911	tr|G3UF88|G3UF88_LOXAF	527	226	275	80	131	0.016	52	0.0570801
sp|A1X283|SPD2B_HUMAN	911	tr|E2RSN0|E2RSN0_CANFA	527	226	275	80	131	0.057	52	0.0570801
sp|A1X283|SPD2B_HUMAN	911	tr|F7CK20|F7CK20_HORSE	527	226	275	80	131	0.063	52	0.0570801
sp|A1X283|SPD2B_HUMAN	911	sp|Q1JPZ3|SRC_DANRE	534	226	275	87	138	0.83	52	0.0570801
sp|A1X283|SPD2B_HUMAN	911	tr|D2GWJ1|D2GWJ1_AILME	526	226	275	79	130	0.071	52	0.0570801
sp|A1X283|SPD2B_HUMAN	911	tr|A5PKG9|A5PKG9_BOVIN	527	226	275	80	131	0.079	52	0.0570801
sp|A1X283|SPD2B_HUMAN	911	sp|Q6P6U0|FGR_RAT	517	226	275	70	121	0.1	52	0.0570801
sp|A1X283|SPD2B_HUMAN	911	sp|P14234|FGR_MOUSE	517	226	275	70	121	0.12	52	0.0570801
sp|A1X283|SPD2B_HUMAN	911	sp|O60504|VINEX_HUMAN	671	226	275	617	668	0.29	52	0.0570801
sp|A1X283|SPD2B_HUMAN	911	tr|F6UG60|F6UG60_ORNAN	533	226	275	83	134	1.1	52	0.0570801
sp|A1X283|SPD2B_HUMAN	911	sp|P00523|SRC_CHICK	533	226	275	86	137	1.2	52	0.0570801
sp|A1X283|SPD2B_HUMAN	911	sp|P19174|PLCG1_HUMAN	1290	229	277	799	848	0.003	50	0.0548847
sp|A1X283|SPD2B_HUMAN	911	sp|P24604|TEC_MOUSE	630	227	275	184	233	0.023	50	0.0548847
sp|A1X283|SPD2B_HUMAN	911	sp|Q60631|GRB2_MOUSE	217	230	276	7	54	0.02	48	0.0526894
sp|A1X283|SPD2B_HUMAN	911	sp|P27870|VAV_MOUSE	845	162	207	792	838	1.6	47	0.0515917
sp|A1X283|SPD2B_HUMAN	911	sp|Q9R1Z8|VINEX_MOUSE	733	230	276	453	499	4.5	47	0.0515917
sp|A1X283|SPD2B_HUMAN	911	sp|O60504|VINEX_HUMAN	671	230	276	389	435	6.1	47	0.0515917
sp|A1X283|SPD2B_HUMAN	911	sp|P27870|VAV_MOUSE	845	864	907	797	837	5.8	45	0.0493963
sp|A1X283|SPD2B_HUMAN	911	tr|E5RJ37|E5RJ37_HUMAN	150	384	424	79	120	0.84	43	0.0472009
sp|A1X283|SPD2B_HUMAN	911	sp|P07948|LYN_HUMAN	512	384	424	79	120	2.9	43	0.0472009
sp|A1X283|SPD2B_HUMAN	911	tr|G1L4Q2|G1L4Q2_AILME	512	384	424	79	120	9.2	43	0.0472009
sp|A1X283|SPD2B_HUMAN	911	tr|F1NL66|F1NL66_CHICK	212	385	424	60	100	3.5	42	0.0461032
sp|A1X283|SPD2B_HUMAN	911	tr|F1NUU2|F1NUU2_CHICK	492	385	424	60	100	8.8	42	0.0461032
sp|A1X283|SPD2B_HUMAN	911	sp|O75995|SASH3_HUMAN	380	236	275	190	229	6.8	40	0.0439078
sp|A1X283|SPD2B_HUMAN	911	tr|B5DFK2|B5DFK2_RAT	380	236	275	190	229	7	40	0.0439078
sp|A1X283|SPD2B_HUMAN	911	tr|F6RT09|F6RT09_HORSE	380	236	275	190	229	7	40	0.0439078
sp|A1X283|SPD2B_HUMAN	911	tr|A2VDZ6|A2VDZ6_BOVIN	410	434	471	9	45	3.3	38	0.0417124
sp|A1X283|SPD2B_HUMAN 最大值										0.170143
sp|A1XG13|YCF1_NUPAD	1868	tr|G3SR12|G3SR12_LOXAF	861	235	315	458	539	1.3	84	0.0449679
sp|A1XG13|YCF1_NUPAD	1868	sp|F1M649|NLRC4_RAT	1023	539	588	557	604	9.6	50	0.0267666
sp|A1XG13|YCF1_NUPAD	1868	sp|Q15327|ANKR1_HUMAN	319	252	292	56	92	4.3	41	0.0219486
sp|A1XG13|YCF1_NUPAD 最大值										0.0449679
sp|A1XIP9|POL1_TOTV	2158	tr|H0WFS3|H0WFS3_OTOGA	283	1097	1169	61	135	2.5	75	0.0347544
sp|A1XIP9|POL1_TOTV	2158	sp|Q62028|PLA2R_MOUSE	1487	827	879	35	89	5.8	55	0.0254866
sp|A1XIP9|POL1_TOTV	2158	tr|G1QLJ9|G1QLJ9_NOMLE	1462	830	879	36	85	8.7	50	0.0231696
sp|A1XIP9|POL1_TOTV 最大值										0.0347544
sp|A1YFC1|PEG3_GORGO	1589	tr|F7C8Q1|F7C8Q1_MONDO	1154	355	1368	96	1111	3e-77	1086	0.683449
sp|A1YFC1|PEG3_GORGO	1589	tr|F7C8Q1|F7C8Q1_MONDO	1154	544	1589	95	1015	2e-55	1076	0.677155
sp|A1YFC1|PEG3_GORGO	1589	tr|F7C8Q1|F7C8Q1_MONDO	1154	460	1361	94	905	5e-70	912	0.573946
sp|A1YFC1|PEG3_GORGO	1589	tr|F7C8Q1|F7C8Q1_MONDO	1154	416	1247	310	1153	9e-63	885	0.556954
sp|A1YFC1|PEG3_GORGO	1589	sp|Q9HBT7|ZN287_HUMAN	754	30	822	26	750	1e-71	817	0.51416
sp|A1YFC1|PEG3_GORGO	1589	tr|F6Z3M1|F6Z3M1_HORSE	743	41	822	26	739	6e-74	806	0.507237
sp|A1YFC1|PEG3_GORGO	1589	tr|G3TH53|G3TH53_LOXAF	753	41	818	37	745	4e-68	797	0.501573
sp|A1YFC1|PEG3_GORGO	1589	tr|F7C8Q1|F7C8Q1_MONDO	1154	416	1130	422	1154	2e-51	782	0.492133
sp|A1YFC1|PEG3_GORGO	1589	tr|F1SDE5|F1SDE5_PIG	760	30	764	33	754	8e-68	766	0.482064
sp|A1YFC1|PEG3_GORGO	1589	tr|A2T7E2|A2T7E2_PANTR	594	317	822	86	590	6e-50	530	0.333543
sp|A1YFC1|PEG3_GORGO	1589	tr|Q5SVS9|Q5SVS9_MOUSE	748	619	1130	347	742	8e-14	512	0.322215
sp|A1YFC1|PEG3_GORGO	1589	sp|Q9EQB9|ZN287_MOUSE	759	619	1130	358	753	1e-13	512	0.322215
sp|A1YFC1|PEG3_GORGO	1589	tr|F6Z3M1|F6Z3M1_HORSE	743	635	1130	330	737	7e-17	496	0.312146
sp|A1YFC1|PEG3_GORGO	1589	sp|Q9HBT7|ZN287_HUMAN	754	635	1130	341	748	2e-16	496	0.312146
sp|A1YFC1|PEG3_GORGO	1589	tr|A2T7E2|A2T7E2_PANTR	594	635	1130	181	588	1e-16	496	0.312146
sp|A1YFC1|PEG3_GORGO	1589	tr|F1SDE5|F1SDE5_PIG	760	636	1130	348	754	6e-16	495	0.311517
sp|A1YFC1|PEG3_GORGO	1589	tr|F1SDE5|F1SDE5_PIG	760	341	822	286	756	2e-48	494	0.310887
sp|A1YFC1|PEG3_GORGO	1589	tr|D4A516|D4A516_RAT	762	371	828	312	761	2e-46	471	0.296413
sp|A1YFC1|PEG3_GORGO	1589	tr|G3TH53|G3TH53_LOXAF	753	739	1185	358	746	6e-16	458	0.288232
sp|A1YFC1|PEG3_GORGO	1589	tr|A2T7E2|A2T7E2_PANTR	594	739	1185	199	587	4e-16	458	0.288232
sp|A1YFC1|PEG3_GORGO	1589	sp|Q9HBT7|ZN287_HUMAN	754	556	995	352	751	1e-27	441	0.277533
sp|A1YFC1|PEG3_GORGO	1589	sp|Q8TD23|ZN675_HUMAN	568	1161	1589	142	560	2e-17	441	0.277533
sp|A1YFC1|PEG3_GORGO	1589	tr|A2T7E2|A2T7E2_PANTR	594	556	995	192	591	7e-28	440	0.276904
sp|A1YFC1|PEG3_GORGO	1589	tr|G3TH53|G3TH53_LOXAF	753	557	995	352	750	3e-29	439	0.276274
sp|A1YFC1|PEG3_GORGO	1589	tr|G3TH53|G3TH53_LOXAF	753	569	1000	308	727	2e-24	438	0.275645
sp|A1YFC1|PEG3_GORGO	1589	sp|Q8TD23|ZN675_HUMAN	568	625	1057	142	562	6e-19	434	0.273128
sp|A1YFC1|PEG3_GORGO	1589	sp|Q9HBT7|ZN287_HUMAN	754	571	1000	339	728	2e-23	433	0.272498
sp|A1YFC1|PEG3_GORGO	1589	tr|A2T7E2|A2T7E2_PANTR	594	571	1000	179	568	1e-23	433	0.272498
sp|A1YFC1|PEG3_GORGO	1589	tr|F6Z3M1|F6Z3M1_HORSE	743	571	1000	328	717	1e-23	431	0.27124
sp|A1YFC1|PEG3_GORGO	1589	tr|F1SDE5|F1SDE5_PIG	760	571	1000	345	734	8e-23	431	0.27124
sp|A1YFC1|PEG3_GORGO	1589	tr|Q5SVS9|Q5SVS9_MOUSE	748	398	822	335	744	6e-46	431	0.27124
sp|A1YFC1|PEG3_GORGO	1589	sp|Q9EQB9|ZN287_MOUSE	759	398	822	346	755	7e-46	431	0.27124
sp|A1YFC1|PEG3_GORGO	1589	tr|F1SDE5|F1SDE5_PIG	760	969	1354	395	753	7e-28	421	0.264947
sp|A1YFC1|PEG3_GORGO	1589	tr|G3TH53|G3TH53_LOXAF	753	362	765	348	748	1e-45	419	0.263688
sp|A1YFC1|PEG3_GORGO	1589	tr|G3TH53|G3TH53_LOXAF	753	906	1304	352	746	2e-27	414	0.260541
sp|A1YFC1|PEG3_GORGO	1589	sp|Q8TD23|ZN675_HUMAN	568	505	911	170	561	3e-32	412	0.259283
sp|A1YFC1|PEG3_GORGO	1589	sp|Q8TD23|ZN675_HUMAN	568	453	856	171	567	6e-37	407	0.256136
sp|A1YFC1|PEG3_GORGO	1589	tr|Q5SVS9|Q5SVS9_MOUSE	748	368	739	355	745	1e-39	403	0.253619
sp|A1YFC1|PEG3_GORGO	1589	sp|Q9EQB9|ZN287_MOUSE	759	368	739	366	756	2e-39	403	0.253619
sp|A1YFC1|PEG3_GORGO	1589	tr|G3TH53|G3TH53_LOXAF	753	969	1357	360	693	2e-29	402	0.252989
sp|A1YFC1|PEG3_GORGO	1589	tr|D4A516|D4A516_RAT	762	969	1355	394	753	3e-32	402	0.252989
sp|A1YFC1|PEG3_GORGO	1589	tr|Q5SVS9|Q5SVS9_MOUSE	748	969	1354	383	741	2e-32	401	0.25236
sp|A1YFC1|PEG3_GORGO	1589	sp|Q9EQB9|ZN287_MOUSE	759	969	1354	394	752	3e-32	401	0.25236
sp|A1YFC1|PEG3_GORGO	1589	sp|Q8TD23|ZN675_HUMAN	568	968	1358	227	562	4e-29	400	0.251731
sp|A1YFC1|PEG3_GORGO	1589	tr|G3TH53|G3TH53_LOXAF	753	968	1358	387	722	8e-30	399	0.251101
sp|A1YFC1|PEG3_GORGO	1589	tr|D4A516|D4A516_RAT	762	605	1000	372	733	3e-22	397	0.249843
sp|A1YFC1|PEG3_GORGO	1589	tr|Q5SVS9|Q5SVS9_MOUSE	748	605	1000	361	722	2e-22	397	0.249843
sp|A1YFC1|PEG3_GORGO	1589	sp|Q9EQB9|ZN287_MOUSE	759	605	1000	372	733	3e-22	397	0.249843
sp|A1YFC1|PEG3_GORGO	1589	sp|Q8TD23|ZN675_HUMAN	568	969	1358	172	534	6e-36	397	0.249843
sp|A1YFC1|PEG3_GORGO	1589	tr|F6Z3M1|F6Z3M1_HORSE	743	978	1357	331	683	4e-30	393	0.247325
sp|A1YFC1|PEG3_GORGO	1589	sp|Q9HBT7|ZN287_HUMAN	754	978	1357	342	694	4e-29	393	0.247325
sp|A1YFC1|PEG3_GORGO	1589	tr|F1SDE5|F1SDE5_PIG	760	978	1357	348	700	1e-29	393	0.247325
sp|A1YFC1|PEG3_GORGO	1589	tr|A2T7E2|A2T7E2_PANTR	594	978	1357	182	534	6e-30	393	0.247325
sp|A1YFC1|PEG3_GORGO	1589	tr|Q4RHQ7|Q4RHQ7_TETNG	838	962	1354	529	838	1e-15	393	0.247325
sp|A1YFC1|PEG3_GORGO	1589	tr|F6Z3M1|F6Z3M1_HORSE	743	969	1354	406	736	6e-28	386	0.24292
sp|A1YFC1|PEG3_GORGO	1589	tr|F6Z3M1|F6Z3M1_HORSE	743	813	1185	394	736	6e-16	386	0.24292
sp|A1YFC1|PEG3_GORGO	1589	sp|Q9HBT7|ZN287_HUMAN	754	969	1354	417	747	1e-27	386	0.24292
sp|A1YFC1|PEG3_GORGO	1589	sp|Q9HBT7|ZN287_HUMAN	754	813	1185	405	747	9e-16	386	0.24292
sp|A1YFC1|PEG3_GORGO	1589	tr|F1SDE5|F1SDE5_PIG	760	813	1185	411	753	9e-16	386	0.24292
sp|A1YFC1|PEG3_GORGO	1589	tr|D4A516|D4A516_RAT	762	813	1185	410	752	2e-17	386	0.24292
sp|A1YFC1|PEG3_GORGO	1589	tr|Q5SVS9|Q5SVS9_MOUSE	748	813	1185	399	741	9e-16	386	0.24292
sp|A1YFC1|PEG3_GORGO	1589	sp|Q9EQB9|ZN287_MOUSE	759	813	1185	410	752	1e-15	386	0.24292
sp|A1YFC1|PEG3_GORGO	1589	tr|A2T7E2|A2T7E2_PANTR	594	969	1304	257	587	5e-28	349	0.219635
sp|A1YFC1|PEG3_GORGO	1589	tr|D4A516|D4A516_RAT	762	503	849	362	698	5e-33	347	0.218376
sp|A1YFC1|PEG3_GORGO	1589	tr|Q5SVS9|Q5SVS9_MOUSE	748	503	849	351	687	1e-33	347	0.218376
sp|A1YFC1|PEG3_GORGO	1589	sp|Q9EQB9|ZN287_MOUSE	759	503	849	362	698	1e-33	347	0.218376
sp|A1YFC1|PEG3_GORGO	1589	sp|Q8TD23|ZN675_HUMAN	568	414	736	252	559	2e-43	326	0.20516
sp|A1YFC1|PEG3_GORGO	1589	tr|Q4RHQ7|Q4RHQ7_TETNG	838	454	752	536	827	2e-17	302	0.190057
sp|A1YFC1|PEG3_GORGO	1589	tr|Q4RHQ7|Q4RHQ7_TETNG	838	961	1247	588	838	2e-11	298	0.187539
sp|A1YFC1|PEG3_GORGO	1589	tr|G3TH53|G3TH53_LOXAF	753	1102	1354	355	634	3e-25	287	0.180617
sp|A1YFC1|PEG3_GORGO	1589	tr|D4A516|D4A516_RAT	762	1102	1354	361	640	3e-22	287	0.180617
sp|A1YFC1|PEG3_GORGO	1589	tr|Q5SVS9|Q5SVS9_MOUSE	748	1102	1354	350	629	4e-23	287	0.180617
sp|A1YFC1|PEG3_GORGO	1589	sp|Q9EQB9|ZN287_MOUSE	759	1102	1354	361	640	5e-23	287	0.180617
sp|A1YFC1|PEG3_GORGO	1589	tr|D4A516|D4A516_RAT	762	1090	1357	433	699	5e-29	281	0.176841
sp|A1YFC1|PEG3_GORGO	1589	tr|Q5SVS9|Q5SVS9_MOUSE	748	1090	1357	422	688	4e-30	281	0.176841
sp|A1YFC1|PEG3_GORGO	1589	sp|Q9EQB9|ZN287_MOUSE	759	1090	1357	433	699	6e-30	281	0.176841
sp|A1YFC1|PEG3_GORGO	1589	tr|Q4SN43|Q4SN43_TETNG	1990	454	680	1120	1387	3e-11	278	0.174953
sp|A1YFC1|PEG3_GORGO	1589	sp|Q8TD23|ZN675_HUMAN	568	1103	1368	168	432	7e-25	276	0.173694
sp|A1YFC1|PEG3_GORGO	1589	sp|Q5VTD9|GFI1B_HUMAN	330	422	683	124	330	2e-13	269	0.169289
sp|A1YFC1|PEG3_GORGO	1589	sp|O70237|GFI1B_MOUSE	330	422	683	124	330	1e-12	269	0.169289
sp|A1YFC1|PEG3_GORGO	1589	tr|Q4RHQ7|Q4RHQ7_TETNG	838	1090	1355	520	727	4e-11	266	0.167401
sp|A1YFC1|PEG3_GORGO	1589	tr|Q4RHQ7|Q4RHQ7_TETNG	838	453	707	591	838	7e-16	258	0.162366
sp|A1YFC1|PEG3_GORGO	1589	sp|Q8TD23|ZN675_HUMAN	568	416	657	338	565	1e-33	245	0.154185
sp|A1YFC1|PEG3_GORGO	1589	sp|Q8TD23|ZN675_HUMAN	568	359	594	387	565	2e-14	239	0.150409
sp|A1YFC1|PEG3_GORGO	1589	sp|Q8TD23|ZN675_HUMAN	568	969	1190	340	563	2e-18	230	0.144745
sp|A1YFC1|PEG3_GORGO	1589	tr|Q4SN43|Q4SN43_TETNG	1990	969	1185	1223	1386	0.0002	221	0.139081
sp|A1YFC1|PEG3_GORGO	1589	tr|A2D6D2|A2D6D2_MACMU	154	969	1185	13	147	5e-09	217	0.136564
sp|A1YFC1|PEG3_GORGO	1589	tr|Q4SN43|Q4SN43_TETNG	1990	1159	1354	1219	1386	1e-05	211	0.132788
sp|A1YFC1|PEG3_GORGO	1589	tr|Q4SN43|Q4SN43_TETNG	1990	1102	1304	1218	1386	2e-08	209	0.131529
sp|A1YFC1|PEG3_GORGO	1589	tr|G3T952|G3T952_LOXAF	708	1151	1350	506	678	0.0001	209	0.131529
sp|A1YFC1|PEG3_GORGO	1589	tr|G1L1V7|G1L1V7_AILME	708	1151	1350	506	678	0.0004	209	0.131529
sp|A1YFC1|PEG3_GORGO	1589	tr|F6XMD7|F6XMD7_ORNAN	713	1151	1350	512	683	3e-05	208	0.1309
sp|A1YFC1|PEG3_GORGO	1589	sp|Q5ZM39|BCL6_CHICK	708	453	647	547	680	2e-08	195	0.122719
sp|A1YFC1|PEG3_GORGO	1589	tr|F1NBN7|F1NBN7_CHICK	708	453	647	547	680	2e-08	195	0.122719
sp|A1YFC1|PEG3_GORGO	1589	tr|G1N6N0|G1N6N0_MELGA	707	453	647	547	680	2e-08	195	0.122719
sp|A1YFC1|PEG3_GORGO	1589	tr|H0ZGK1|H0ZGK1_TAEGU	709	453	647	548	681	2e-08	195	0.122719
sp|A1YFC1|PEG3_GORGO	1589	tr|Q544F9|Q544F9_MOUSE	707	453	647	546	679	2e-08	195	0.122719
sp|A1YFC1|PEG3_GORGO	1589	sp|P41183|BCL6_MOUSE	707	453	647	546	679	2e-08	195	0.122719
sp|A1YFC1|PEG3_GORGO	1589	tr|B2GUV8|B2GUV8_RAT	707	453	647	546	679	2e-08	195	0.122719
sp|A1YFC1|PEG3_GORGO	1589	tr|G3T952|G3T952_LOXAF	708	453	647	545	680	4e-09	195	0.122719
sp|A1YFC1|PEG3_GORGO	1589	tr|G1L1V7|G1L1V7_AILME	708	453	647	545	680	6e-09	195	0.122719
sp|A1YFC1|PEG3_GORGO	1589	tr|E1B8E6|E1B8E6_BOVIN	706	453	647	545	678	2e-08	195	0.122719
sp|A1YFC1|PEG3_GORGO	1589	tr|D2H065|D2H065_AILME	706	453	647	545	678	2e-08	195	0.122719
sp|A1YFC1|PEG3_GORGO	1589	tr|Q5RB65|Q5RB65_PONAB	706	453	647	545	678	2e-08	195	0.122719
sp|A1YFC1|PEG3_GORGO	1589	sp|P41182|BCL6_HUMAN	706	453	647	545	678	2e-08	195	0.122719
sp|A1YFC1|PEG3_GORGO	1589	tr|F6XMD7|F6XMD7_ORNAN	713	453	647	551	685	1e-08	195	0.122719
sp|A1YFC1|PEG3_GORGO	1589	tr|F7AXS6|F7AXS6_HORSE	707	453	647	546	679	2e-08	195	0.122719
sp|A1YFC1|PEG3_GORGO	1589	tr|Q4RHQ7|Q4RHQ7_TETNG	838	693	882	544	734	1.7	193	0.12146
sp|A1YFC1|PEG3_GORGO	1589	sp|Q5ZM39|BCL6_CHICK	708	476	655	487	660	1e-09	184	0.115796
sp|A1YFC1|PEG3_GORGO	1589	tr|F1NBN7|F1NBN7_CHICK	708	476	655	487	660	1e-09	184	0.115796
sp|A1YFC1|PEG3_GORGO	1589	tr|G1N6N0|G1N6N0_MELGA	707	476	655	487	660	1e-09	184	0.115796
sp|A1YFC1|PEG3_GORGO	1589	tr|H0ZGK1|H0ZGK1_TAEGU	709	476	655	488	661	2e-09	184	0.115796
sp|A1YFC1|PEG3_GORGO	1589	tr|Q544F9|Q544F9_MOUSE	707	476	655	486	659	3e-09	184	0.115796
sp|A1YFC1|PEG3_GORGO	1589	sp|P41183|BCL6_MOUSE	707	476	655	486	659	3e-09	184	0.115796
sp|A1YFC1|PEG3_GORGO	1589	tr|B2GUV8|B2GUV8_RAT	707	476	655	486	659	3e-09	184	0.115796
sp|A1YFC1|PEG3_GORGO	1589	tr|E1B8E6|E1B8E6_BOVIN	706	476	655	485	658	8e-09	184	0.115796
sp|A1YFC1|PEG3_GORGO	1589	tr|D2H065|D2H065_AILME	706	476	655	485	658	1e-08	184	0.115796
sp|A1YFC1|PEG3_GORGO	1589	tr|Q5RB65|Q5RB65_PONAB	706	476	655	485	658	1e-08	184	0.115796
sp|A1YFC1|PEG3_GORGO	1589	sp|P41182|BCL6_HUMAN	706	476	655	485	658	1e-08	184	0.115796
sp|A1YFC1|PEG3_GORGO	1589	tr|F7AXS6|F7AXS6_HORSE	707	476	655	486	659	1e-08	184	0.115796
sp|A1YFC1|PEG3_GORGO	1589	tr|B2RQ06|B2RQ06_MOUSE	465	1046	1190	276	432	0.61	169	0.106356
sp|A1YFC1|PEG3_GORGO	1589	sp|Q9JKD9|ZBT32_MOUSE	465	1046	1190	276	432	1.6	169	0.106356
sp|A1YFC1|PEG3_GORGO	1589	sp|O70237|GFI1B_MOUSE	330	969	1126	163	323	2.6	167	0.105098
sp|A1YFC1|PEG3_GORGO	1589	tr|G1N228|G1N228_MELGA	241	1165	1304	82	240	0.046	166	0.104468
sp|A1YFC1|PEG3_GORGO	1589	sp|Q5ZM39|BCL6_CHICK	708	368	527	548	680	0.006	163	0.10258
sp|A1YFC1|PEG3_GORGO	1589	tr|F1NBN7|F1NBN7_CHICK	708	368	527	548	680	0.006	163	0.10258
sp|A1YFC1|PEG3_GORGO	1589	tr|G1N6N0|G1N6N0_MELGA	707	368	527	548	680	0.006	163	0.10258
sp|A1YFC1|PEG3_GORGO	1589	tr|H0ZGK1|H0ZGK1_TAEGU	709	368	527	549	681	0.005	163	0.10258
sp|A1YFC1|PEG3_GORGO	1589	tr|Q544F9|Q544F9_MOUSE	707	368	527	547	679	0.002	163	0.10258
sp|A1YFC1|PEG3_GORGO	1589	sp|P41183|BCL6_MOUSE	707	368	527	547	679	0.002	163	0.10258
sp|A1YFC1|PEG3_GORGO	1589	tr|B2GUV8|B2GUV8_RAT	707	368	527	547	679	0.002	163	0.10258
sp|A1YFC1|PEG3_GORGO	1589	tr|E1B8E6|E1B8E6_BOVIN	706	368	527	546	678	0.002	163	0.10258
sp|A1YFC1|PEG3_GORGO	1589	tr|D2H065|D2H065_AILME	706	368	527	546	678	0.002	163	0.10258
sp|A1YFC1|PEG3_GORGO	1589	tr|Q5RB65|Q5RB65_PONAB	706	368	527	546	678	0.002	163	0.10258
sp|A1YFC1|PEG3_GORGO	1589	sp|P41182|BCL6_HUMAN	706	368	527	546	678	0.002	163	0.10258
sp|A1YFC1|PEG3_GORGO	1589	tr|F7AXS6|F7AXS6_HORSE	707	368	527	547	679	0.002	163	0.10258
sp|A1YFC1|PEG3_GORGO	1589	tr|Q4SN43|Q4SN43_TETNG	1990	1091	1247	1235	1386	2e-08	160	0.100692
sp|A1YFC1|PEG3_GORGO	1589	tr|A2D6D2|A2D6D2_MACMU	154	553	708	1	148	1e-16	158	0.0994336
sp|A1YFC1|PEG3_GORGO	1589	sp|Q5VTD9|GFI1B_HUMAN	330	969	1126	192	323	4.7	158	0.0994336
sp|A1YFC1|PEG3_GORGO	1589	tr|A2D6D2|A2D6D2_MACMU	154	442	594	1	154	1e-18	156	0.098175
sp|A1YFC1|PEG3_GORGO	1589	tr|A2D6D2|A2D6D2_MACMU	154	1151	1304	1	147	7e-15	155	0.0975456
sp|A1YFC1|PEG3_GORGO	1589	tr|A2D6D2|A2D6D2_MACMU	154	1099	1247	5	147	7e-16	154	0.0969163
sp|A1YFC1|PEG3_GORGO	1589	sp|Q5VTD9|GFI1B_HUMAN	330	1224	1375	162	291	2e-05	152	0.0956576
sp|A1YFC1|PEG3_GORGO	1589	tr|E1C442|E1C442_CHICK	380	1179	1304	235	379	0.46	152	0.0956576
sp|A1YFC1|PEG3_GORGO	1589	tr|A2D6D2|A2D6D2_MACMU	154	644	794	2	150	9e-12	151	0.0950283
sp|A1YFC1|PEG3_GORGO	1589	sp|Q5VTD9|GFI1B_HUMAN	330	1154	1300	183	322	1e-05	150	0.094399
sp|A1YFC1|PEG3_GORGO	1589	sp|O70237|GFI1B_MOUSE	330	1154	1300	183	322	9e-06	150	0.094399
sp|A1YFC1|PEG3_GORGO	1589	sp|O70237|GFI1B_MOUSE	330	1227	1375	194	291	4e-05	149	0.0937697
sp|A1YFC1|PEG3_GORGO	1589	tr|G3T952|G3T952_LOXAF	708	1104	1245	543	680	4e-06	148	0.0931403
sp|A1YFC1|PEG3_GORGO	1589	tr|G1L1V7|G1L1V7_AILME	708	1104	1245	543	680	3e-06	148	0.0931403
sp|A1YFC1|PEG3_GORGO	1589	tr|H0ZGK1|H0ZGK1_TAEGU	709	562	708	546	656	2e-05	147	0.092511
sp|A1YFC1|PEG3_GORGO	1589	tr|E1B8E6|E1B8E6_BOVIN	706	562	708	543	653	1e-05	147	0.092511
sp|A1YFC1|PEG3_GORGO	1589	tr|D2H065|D2H065_AILME	706	562	708	543	653	1e-05	147	0.092511
sp|A1YFC1|PEG3_GORGO	1589	tr|Q5RB65|Q5RB65_PONAB	706	562	708	543	653	1e-05	147	0.092511
sp|A1YFC1|PEG3_GORGO	1589	sp|P41182|BCL6_HUMAN	706	562	708	543	653	1e-05	147	0.092511
sp|A1YFC1|PEG3_GORGO	1589	tr|F6XMD7|F6XMD7_ORNAN	713	1104	1245	549	685	3e-06	147	0.092511
sp|A1YFC1|PEG3_GORGO	1589	tr|F6XMD7|F6XMD7_ORNAN	713	562	708	549	660	7e-05	147	0.092511
sp|A1YFC1|PEG3_GORGO	1589	tr|F7AXS6|F7AXS6_HORSE	707	562	708	544	654	1e-05	147	0.092511
sp|A1YFC1|PEG3_GORGO	1589	tr|A2D6D2|A2D6D2_MACMU	154	677	822	5	150	4e-12	146	0.0918817
sp|A1YFC1|PEG3_GORGO	1589	tr|D4A2U2|D4A2U2_RAT	483	453	594	367	480	2.3	146	0.0918817
sp|A1YFC1|PEG3_GORGO	1589	sp|Q5ZM39|BCL6_CHICK	708	1104	1247	545	654	5e-06	144	0.090623
sp|A1YFC1|PEG3_GORGO	1589	tr|F1NBN7|F1NBN7_CHICK	708	1104	1247	545	654	5e-06	144	0.090623
sp|A1YFC1|PEG3_GORGO	1589	tr|G1N6N0|G1N6N0_MELGA	707	1104	1247	545	654	5e-06	144	0.090623
sp|A1YFC1|PEG3_GORGO	1589	tr|H0ZGK1|H0ZGK1_TAEGU	709	1104	1247	546	655	5e-06	144	0.090623
sp|A1YFC1|PEG3_GORGO	1589	tr|Q544F9|Q544F9_MOUSE	707	1104	1247	544	653	6e-06	144	0.090623
sp|A1YFC1|PEG3_GORGO	1589	sp|P41183|BCL6_MOUSE	707	1104	1247	544	653	6e-06	144	0.090623
sp|A1YFC1|PEG3_GORGO	1589	tr|B2GUV8|B2GUV8_RAT	707	1104	1247	544	653	5e-06	144	0.090623
sp|A1YFC1|PEG3_GORGO	1589	tr|E1B8E6|E1B8E6_BOVIN	706	1104	1247	543	652	6e-06	144	0.090623
sp|A1YFC1|PEG3_GORGO	1589	tr|D2H065|D2H065_AILME	706	1104	1247	543	652	5e-06	144	0.090623
sp|A1YFC1|PEG3_GORGO	1589	tr|Q5RB65|Q5RB65_PONAB	706	1104	1247	543	652	5e-06	144	0.090623
sp|A1YFC1|PEG3_GORGO	1589	sp|P41182|BCL6_HUMAN	706	1104	1247	543	652	5e-06	144	0.090623
sp|A1YFC1|PEG3_GORGO	1589	tr|F7AXS6|F7AXS6_HORSE	707	1104	1247	544	653	5e-06	144	0.090623
sp|A1YFC1|PEG3_GORGO	1589	tr|Q4SN43|Q4SN43_TETNG	1990	450	587	1247	1386	5e-08	142	0.0893644
sp|A1YFC1|PEG3_GORGO	1589	tr|G1L1V7|G1L1V7_AILME	708	395	527	556	680	0.002	139	0.0874764
sp|A1YFC1|PEG3_GORGO	1589	sp|Q5VTD9|GFI1B_HUMAN	330	1107	1243	192	322	0.013	137	0.0862177
sp|A1YFC1|PEG3_GORGO	1589	sp|O70237|GFI1B_MOUSE	330	1107	1243	192	322	0.013	137	0.0862177
sp|A1YFC1|PEG3_GORGO	1589	tr|Q4SN43|Q4SN43_TETNG	1990	1226	1354	1224	1329	5e-06	137	0.0862177
sp|A1YFC1|PEG3_GORGO	1589	tr|A2D6D2|A2D6D2_MACMU	154	1226	1354	14	147	8e-12	136	0.0855884
sp|A1YFC1|PEG3_GORGO	1589	tr|Q5SVS9|Q5SVS9_MOUSE	748	41	147	26	158	1e-21	133	0.0837004
sp|A1YFC1|PEG3_GORGO	1589	sp|Q9EQB9|ZN287_MOUSE	759	41	147	37	169	1e-21	133	0.0837004
sp|A1YFC1|PEG3_GORGO	1589	tr|B7ZC81|B7ZC81_MOUSE	274	41	147	26	158	2e-21	133	0.0837004
sp|A1YFC1|PEG3_GORGO	1589	tr|Q4SN43|Q4SN43_TETNG	1990	624	755	1220	1349	0.011	132	0.0830711
sp|A1YFC1|PEG3_GORGO	1589	tr|B2RQ06|B2RQ06_MOUSE	465	453	579	349	447	3.8	131	0.0824418
sp|A1YFC1|PEG3_GORGO	1589	sp|Q9JKD9|ZBT32_MOUSE	465	453	579	349	447	3.6	131	0.0824418
sp|A1YFC1|PEG3_GORGO	1589	tr|A2D6D2|A2D6D2_MACMU	154	365	477	32	148	0.009	125	0.0786658
sp|A1YFC1|PEG3_GORGO	1589	sp|Q5VTD9|GFI1B_HUMAN	330	627	750	192	313	4e-05	124	0.0780365
sp|A1YFC1|PEG3_GORGO	1589	sp|O70237|GFI1B_MOUSE	330	627	750	192	313	5e-05	124	0.0780365
sp|A1YFC1|PEG3_GORGO	1589	sp|Q9HBT7|ZN287_HUMAN	754	1258	1380	349	435	0.004	123	0.0774072
sp|A1YFC1|PEG3_GORGO	1589	tr|F1SDE5|F1SDE5_PIG	760	1258	1380	355	441	0.015	123	0.0774072
sp|A1YFC1|PEG3_GORGO	1589	tr|A2T7E2|A2T7E2_PANTR	594	1258	1380	189	275	0.004	123	0.0774072
sp|A1YFC1|PEG3_GORGO	1589	tr|D4A516|D4A516_RAT	762	16	138	20	141	7e-23	123	0.0774072
sp|A1YFC1|PEG3_GORGO	1589	tr|D4A516|D4A516_RAT	762	1258	1380	354	440	0.39	123	0.0774072
sp|A1YFC1|PEG3_GORGO	1589	sp|Q5ZM39|BCL6_CHICK	708	1270	1381	508	625	0.4	123	0.0774072
sp|A1YFC1|PEG3_GORGO	1589	tr|F1NBN7|F1NBN7_CHICK	708	1270	1381	508	625	0.39	123	0.0774072
sp|A1YFC1|PEG3_GORGO	1589	tr|G1N6N0|G1N6N0_MELGA	707	1270	1381	508	625	0.41	123	0.0774072
sp|A1YFC1|PEG3_GORGO	1589	tr|H0ZGK1|H0ZGK1_TAEGU	709	1270	1381	509	626	0.41	123	0.0774072
sp|A1YFC1|PEG3_GORGO	1589	tr|Q544F9|Q544F9_MOUSE	707	1270	1381	507	624	3.1	123	0.0774072
sp|A1YFC1|PEG3_GORGO	1589	sp|P41183|BCL6_MOUSE	707	1270	1381	507	624	3.1	123	0.0774072
sp|A1YFC1|PEG3_GORGO	1589	tr|B2GUV8|B2GUV8_RAT	707	1270	1381	507	624	3.5	123	0.0774072
sp|A1YFC1|PEG3_GORGO	1589	tr|G3T952|G3T952_LOXAF	708	1270	1381	506	625	3.4	123	0.0774072
sp|A1YFC1|PEG3_GORGO	1589	tr|G1L1V7|G1L1V7_AILME	708	1270	1381	506	625	5.3	123	0.0774072
sp|A1YFC1|PEG3_GORGO	1589	tr|E1B8E6|E1B8E6_BOVIN	706	1270	1381	506	623	3.3	123	0.0774072
sp|A1YFC1|PEG3_GORGO	1589	tr|D2H065|D2H065_AILME	706	1270	1381	506	623	3.1	123	0.0774072
sp|A1YFC1|PEG3_GORGO	1589	tr|Q5RB65|Q5RB65_PONAB	706	1270	1381	506	623	3	123	0.0774072
sp|A1YFC1|PEG3_GORGO	1589	sp|P41182|BCL6_HUMAN	706	1270	1381	506	623	3.1	123	0.0774072
sp|A1YFC1|PEG3_GORGO	1589	tr|F6XMD7|F6XMD7_ORNAN	713	1270	1381	512	630	2	123	0.0774072
sp|A1YFC1|PEG3_GORGO	1589	tr|F7AXS6|F7AXS6_HORSE	707	1270	1381	507	624	3.3	123	0.0774072
sp|A1YFC1|PEG3_GORGO	1589	sp|Q5VTD9|GFI1B_HUMAN	330	605	722	198	317	7e-07	122	0.0767778
sp|A1YFC1|PEG3_GORGO	1589	sp|O70237|GFI1B_MOUSE	330	605	722	198	317	9e-07	122	0.0767778
sp|A1YFC1|PEG3_GORGO	1589	sp|Q5VTD9|GFI1B_HUMAN	330	1104	1217	217	328	7e-06	119	0.0748899
sp|A1YFC1|PEG3_GORGO	1589	sp|O70237|GFI1B_MOUSE	330	1104	1217	217	328	5e-06	119	0.0748899
sp|A1YFC1|PEG3_GORGO	1589	tr|F6Z3M1|F6Z3M1_HORSE	743	1497	1589	537	654	0.0001	118	0.0742605
sp|A1YFC1|PEG3_GORGO	1589	sp|Q9HBT7|ZN287_HUMAN	754	1497	1589	548	665	0.0002	118	0.0742605
sp|A1YFC1|PEG3_GORGO	1589	tr|G3TH53|G3TH53_LOXAF	753	1497	1589	547	664	0.0002	118	0.0742605
sp|A1YFC1|PEG3_GORGO	1589	tr|F1SDE5|F1SDE5_PIG	760	1497	1589	554	671	0.0001	118	0.0742605
sp|A1YFC1|PEG3_GORGO	1589	tr|A2T7E2|A2T7E2_PANTR	594	1497	1589	388	505	0.0002	118	0.0742605
sp|A1YFC1|PEG3_GORGO	1589	tr|D4A516|D4A516_RAT	762	1497	1589	553	670	0.0005	118	0.0742605
sp|A1YFC1|PEG3_GORGO	1589	tr|Q5SVS9|Q5SVS9_MOUSE	748	1497	1589	542	659	0.002	118	0.0742605
sp|A1YFC1|PEG3_GORGO	1589	sp|Q9EQB9|ZN287_MOUSE	759	1497	1589	553	670	0.002	118	0.0742605
sp|A1YFC1|PEG3_GORGO	1589	tr|A2D6D2|A2D6D2_MACMU	154	416	530	39	148	4e-12	118	0.0742605
sp|A1YFC1|PEG3_GORGO	1589	tr|B2RQ06|B2RQ06_MOUSE	465	610	725	342	445	1.2	116	0.0730019
sp|A1YFC1|PEG3_GORGO	1589	sp|Q9JKD9|ZBT32_MOUSE	465	610	725	342	445	1.2	116	0.0730019
sp|A1YFC1|PEG3_GORGO	1589	tr|D4A2U2|D4A2U2_RAT	483	610	725	360	463	1.1	116	0.0730019
sp|A1YFC1|PEG3_GORGO	1589	tr|E1B8E6|E1B8E6_BOVIN	706	1485	1589	492	598	0.39	115	0.0723726
sp|A1YFC1|PEG3_GORGO	1589	tr|F7ASG1|F7ASG1_HORSE	491	1083	1190	355	457	0.86	115	0.0723726
sp|A1YFC1|PEG3_GORGO	1589	tr|Q544F9|Q544F9_MOUSE	707	1486	1589	494	599	0.46	114	0.0717432
sp|A1YFC1|PEG3_GORGO	1589	sp|P41183|BCL6_MOUSE	707	1486	1589	494	599	0.46	114	0.0717432
sp|A1YFC1|PEG3_GORGO	1589	tr|B2GUV8|B2GUV8_RAT	707	1486	1589	494	599	0.45	114	0.0717432
sp|A1YFC1|PEG3_GORGO	1589	tr|D2H065|D2H065_AILME	706	1486	1589	493	598	0.53	114	0.0717432
sp|A1YFC1|PEG3_GORGO	1589	tr|Q5RB65|Q5RB65_PONAB	706	1486	1589	493	598	0.47	114	0.0717432
sp|A1YFC1|PEG3_GORGO	1589	sp|P41182|BCL6_HUMAN	706	1486	1589	493	598	0.45	114	0.0717432
sp|A1YFC1|PEG3_GORGO	1589	tr|F6XMD7|F6XMD7_ORNAN	713	1487	1589	500	605	1.4	114	0.0717432
sp|A1YFC1|PEG3_GORGO	1589	tr|F7AXS6|F7AXS6_HORSE	707	1486	1589	494	599	0.48	114	0.0717432
sp|A1YFC1|PEG3_GORGO	1589	tr|A2D6D2|A2D6D2_MACMU	154	1090	1200	24	134	2e-11	111	0.0698553
sp|A1YFC1|PEG3_GORGO	1589	tr|Q4SN43|Q4SN43_TETNG	1990	600	708	1224	1330	0.0001	109	0.0685966
sp|A1YFC1|PEG3_GORGO	1589	tr|Q4SN43|Q4SN43_TETNG	1990	1080	1181	892	993	3e-06	106	0.0667086
sp|A1YFC1|PEG3_GORGO	1589	sp|Q5ZM39|BCL6_CHICK	708	1492	1589	502	600	2.3	103	0.0648206
sp|A1YFC1|PEG3_GORGO	1589	tr|F1NBN7|F1NBN7_CHICK	708	1492	1589	502	600	2.3	103	0.0648206
sp|A1YFC1|PEG3_GORGO	1589	tr|G1N6N0|G1N6N0_MELGA	707	1492	1589	502	600	2.2	103	0.0648206
sp|A1YFC1|PEG3_GORGO	1589	tr|H0ZGK1|H0ZGK1_TAEGU	709	1492	1589	503	601	2.3	103	0.0648206
sp|A1YFC1|PEG3_GORGO	1589	tr|Q3UZW0|Q3UZW0_MOUSE	297	41	142	37	138	1e-21	102	0.0641913
sp|A1YFC1|PEG3_GORGO	1589	tr|A2D6D2|A2D6D2_MACMU	154	758	857	2	101	0.51	100	0.0629327
sp|A1YFC1|PEG3_GORGO	1589	tr|F6Z3M1|F6Z3M1_HORSE	743	1491	1589	363	458	3e-05	99	0.0623033
sp|A1YFC1|PEG3_GORGO	1589	sp|Q9HBT7|ZN287_HUMAN	754	1491	1589	374	469	5e-05	99	0.0623033
sp|A1YFC1|PEG3_GORGO	1589	tr|F1SDE5|F1SDE5_PIG	760	1491	1589	380	475	0.0001	99	0.0623033
sp|A1YFC1|PEG3_GORGO	1589	tr|A2T7E2|A2T7E2_PANTR	594	1491	1589	214	309	9e-05	99	0.0623033
sp|A1YFC1|PEG3_GORGO	1589	tr|F7C8Q1|F7C8Q1_MONDO	1154	1495	1589	1008	1099	1.3	98	0.061674
sp|A1YFC1|PEG3_GORGO	1589	tr|F6Z3M1|F6Z3M1_HORSE	743	1495	1589	507	598	7e-08	98	0.061674
sp|A1YFC1|PEG3_GORGO	1589	tr|F6Z3M1|F6Z3M1_HORSE	743	1495	1589	647	738	1e-05	98	0.061674
sp|A1YFC1|PEG3_GORGO	1589	sp|Q9HBT7|ZN287_HUMAN	754	1495	1589	518	609	8e-08	98	0.061674
sp|A1YFC1|PEG3_GORGO	1589	sp|Q9HBT7|ZN287_HUMAN	754	1495	1589	658	749	1e-05	98	0.061674
sp|A1YFC1|PEG3_GORGO	1589	tr|G3TH53|G3TH53_LOXAF	753	1495	1589	517	608	9e-08	98	0.061674
sp|A1YFC1|PEG3_GORGO	1589	tr|F1SDE5|F1SDE5_PIG	760	1495	1589	524	615	7e-08	98	0.061674
sp|A1YFC1|PEG3_GORGO	1589	tr|F1SDE5|F1SDE5_PIG	760	1495	1589	664	755	8e-06	98	0.061674
sp|A1YFC1|PEG3_GORGO	1589	tr|A2T7E2|A2T7E2_PANTR	594	1495	1589	358	449	1e-07	98	0.061674
sp|A1YFC1|PEG3_GORGO	1589	tr|A2T7E2|A2T7E2_PANTR	594	1495	1589	498	589	2e-05	98	0.061674
sp|A1YFC1|PEG3_GORGO	1589	tr|D4A516|D4A516_RAT	762	1495	1589	523	614	5e-08	98	0.061674
sp|A1YFC1|PEG3_GORGO	1589	tr|D4A516|D4A516_RAT	762	1495	1589	663	754	0.0002	98	0.061674
sp|A1YFC1|PEG3_GORGO	1589	tr|Q5SVS9|Q5SVS9_MOUSE	748	1495	1589	512	603	2e-07	98	0.061674
sp|A1YFC1|PEG3_GORGO	1589	tr|Q5SVS9|Q5SVS9_MOUSE	748	1495	1589	652	743	1e-05	98	0.061674
sp|A1YFC1|PEG3_GORGO	1589	sp|Q9EQB9|ZN287_MOUSE	759	1495	1589	523	614	2e-07	98	0.061674
sp|A1YFC1|PEG3_GORGO	1589	sp|Q9EQB9|ZN287_MOUSE	759	1495	1589	663	754	1e-05	98	0.061674
sp|A1YFC1|PEG3_GORGO	1589	tr|A2D6D2|A2D6D2_MACMU	154	1495	1589	58	149	1e-05	98	0.061674
sp|A1YFC1|PEG3_GORGO	1589	tr|G3TH53|G3TH53_LOXAF	753	1495	1588	657	747	0.0001	97	0.0610447
sp|A1YFC1|PEG3_GORGO	1589	tr|Q4RHQ7|Q4RHQ7_TETNG	838	1497	1588	723	811	1.3	97	0.0610447
sp|A1YFC1|PEG3_GORGO	1589	sp|Q5ZM39|BCL6_CHICK	708	1104	1200	573	669	5e-05	97	0.0610447
sp|A1YFC1|PEG3_GORGO	1589	sp|Q5ZM39|BCL6_CHICK	708	1269	1358	563	658	0.0002	97	0.0610447
sp|A1YFC1|PEG3_GORGO	1589	tr|F1NBN7|F1NBN7_CHICK	708	1104	1200	573	669	5e-05	97	0.0610447
sp|A1YFC1|PEG3_GORGO	1589	tr|F1NBN7|F1NBN7_CHICK	708	1269	1358	563	658	0.0002	97	0.0610447
sp|A1YFC1|PEG3_GORGO	1589	tr|G1N6N0|G1N6N0_MELGA	707	1104	1200	573	669	6e-05	97	0.0610447
sp|A1YFC1|PEG3_GORGO	1589	tr|G1N6N0|G1N6N0_MELGA	707	1269	1358	563	658	0.0002	97	0.0610447
sp|A1YFC1|PEG3_GORGO	1589	tr|H0ZGK1|H0ZGK1_TAEGU	709	1104	1200	574	670	5e-05	97	0.0610447
sp|A1YFC1|PEG3_GORGO	1589	tr|H0ZGK1|H0ZGK1_TAEGU	709	1269	1358	564	659	0.0002	97	0.0610447
sp|A1YFC1|PEG3_GORGO	1589	tr|Q544F9|Q544F9_MOUSE	707	1104	1200	572	668	2e-05	97	0.0610447
sp|A1YFC1|PEG3_GORGO	1589	tr|Q544F9|Q544F9_MOUSE	707	1269	1358	562	657	0.0004	97	0.0610447
sp|A1YFC1|PEG3_GORGO	1589	sp|P41183|BCL6_MOUSE	707	1104	1200	572	668	2e-05	97	0.0610447
sp|A1YFC1|PEG3_GORGO	1589	sp|P41183|BCL6_MOUSE	707	1269	1358	562	657	0.0004	97	0.0610447
sp|A1YFC1|PEG3_GORGO	1589	tr|B2GUV8|B2GUV8_RAT	707	1104	1200	572	668	2e-05	97	0.0610447
sp|A1YFC1|PEG3_GORGO	1589	tr|B2GUV8|B2GUV8_RAT	707	1269	1358	562	657	0.0004	97	0.0610447
sp|A1YFC1|PEG3_GORGO	1589	tr|E1B8E6|E1B8E6_BOVIN	706	1104	1200	571	667	2e-05	97	0.0610447
sp|A1YFC1|PEG3_GORGO	1589	tr|E1B8E6|E1B8E6_BOVIN	706	1269	1358	561	656	0.0003	97	0.0610447
sp|A1YFC1|PEG3_GORGO	1589	tr|D2H065|D2H065_AILME	706	1104	1200	571	667	2e-05	97	0.0610447
sp|A1YFC1|PEG3_GORGO	1589	tr|D2H065|D2H065_AILME	706	1269	1358	561	656	0.0003	97	0.0610447
sp|A1YFC1|PEG3_GORGO	1589	tr|Q5RB65|Q5RB65_PONAB	706	1104	1200	571	667	2e-05	97	0.0610447
sp|A1YFC1|PEG3_GORGO	1589	tr|Q5RB65|Q5RB65_PONAB	706	1269	1358	561	656	0.0003	97	0.0610447
sp|A1YFC1|PEG3_GORGO	1589	sp|P41182|BCL6_HUMAN	706	1104	1200	571	667	2e-05	97	0.0610447
sp|A1YFC1|PEG3_GORGO	1589	sp|P41182|BCL6_HUMAN	706	1269	1358	561	656	0.0003	97	0.0610447
sp|A1YFC1|PEG3_GORGO	1589	tr|F7AXS6|F7AXS6_HORSE	707	1104	1200	572	668	2e-05	97	0.0610447
sp|A1YFC1|PEG3_GORGO	1589	tr|F7AXS6|F7AXS6_HORSE	707	1269	1358	562	657	0.0004	97	0.0610447
sp|A1YFC1|PEG3_GORGO	1589	tr|F7C8Q1|F7C8Q1_MONDO	1154	1497	1589	1038	1127	0.097	96	0.0604154
sp|A1YFC1|PEG3_GORGO	1589	tr|F6Z3M1|F6Z3M1_HORSE	743	1497	1589	481	570	3e-06	96	0.0604154
sp|A1YFC1|PEG3_GORGO	1589	sp|Q9HBT7|ZN287_HUMAN	754	1497	1589	492	581	4e-06	96	0.0604154
sp|A1YFC1|PEG3_GORGO	1589	tr|G3TH53|G3TH53_LOXAF	753	1497	1589	491	580	4e-06	96	0.0604154
sp|A1YFC1|PEG3_GORGO	1589	tr|F1SDE5|F1SDE5_PIG	760	1497	1589	498	587	3e-06	96	0.0604154
sp|A1YFC1|PEG3_GORGO	1589	tr|A2T7E2|A2T7E2_PANTR	594	1497	1589	332	421	6e-06	96	0.0604154
sp|A1YFC1|PEG3_GORGO	1589	tr|D4A516|D4A516_RAT	762	1497	1589	497	586	7e-06	96	0.0604154
sp|A1YFC1|PEG3_GORGO	1589	tr|Q5SVS9|Q5SVS9_MOUSE	748	1497	1589	486	575	3e-06	96	0.0604154
sp|A1YFC1|PEG3_GORGO	1589	sp|Q9EQB9|ZN287_MOUSE	759	1497	1589	497	586	3e-06	96	0.0604154
sp|A1YFC1|PEG3_GORGO	1589	tr|A2D6D2|A2D6D2_MACMU	154	1270	1357	1	94	2e-08	95	0.059786
sp|A1YFC1|PEG3_GORGO	1589	tr|Q4RHQ7|Q4RHQ7_TETNG	838	1495	1588	553	643	0.0006	95	0.059786
sp|A1YFC1|PEG3_GORGO	1589	tr|E1BHU5|E1BHU5_BOVIN	489	1104	1190	371	456	9	94	0.0591567
sp|A1YFC1|PEG3_GORGO	1589	tr|F6Z3M1|F6Z3M1_HORSE	743	1497	1589	397	486	0.0002	93	0.0585274
sp|A1YFC1|PEG3_GORGO	1589	sp|Q9HBT7|ZN287_HUMAN	754	1497	1589	408	497	0.0002	93	0.0585274
sp|A1YFC1|PEG3_GORGO	1589	tr|G3TH53|G3TH53_LOXAF	753	1497	1589	379	468	2e-05	93	0.0585274
sp|A1YFC1|PEG3_GORGO	1589	tr|G3TH53|G3TH53_LOXAF	753	1497	1589	407	496	0.0005	93	0.0585274
sp|A1YFC1|PEG3_GORGO	1589	tr|F1SDE5|F1SDE5_PIG	760	1497	1589	414	503	0.0005	93	0.0585274
sp|A1YFC1|PEG3_GORGO	1589	tr|A2T7E2|A2T7E2_PANTR	594	1497	1589	248	337	0.0003	93	0.0585274
sp|A1YFC1|PEG3_GORGO	1589	tr|D4A516|D4A516_RAT	762	1497	1589	413	502	0.001	93	0.0585274
sp|A1YFC1|PEG3_GORGO	1589	tr|Q5SVS9|Q5SVS9_MOUSE	748	1497	1589	374	463	0.0005	93	0.0585274
sp|A1YFC1|PEG3_GORGO	1589	tr|Q5SVS9|Q5SVS9_MOUSE	748	1497	1589	402	491	0.001	93	0.0585274
sp|A1YFC1|PEG3_GORGO	1589	sp|Q9EQB9|ZN287_MOUSE	759	1497	1589	385	474	0.0005	93	0.0585274
sp|A1YFC1|PEG3_GORGO	1589	sp|Q9EQB9|ZN287_MOUSE	759	1497	1589	413	502	0.001	93	0.0585274
sp|A1YFC1|PEG3_GORGO	1589	tr|A2D6D2|A2D6D2_MACMU	154	729	821	1	93	1	93	0.0585274
sp|A1YFC1|PEG3_GORGO	1589	sp|Q5ZM39|BCL6_CHICK	708	1497	1589	567	656	3.4	93	0.0585274
sp|A1YFC1|PEG3_GORGO	1589	tr|F1NBN7|F1NBN7_CHICK	708	1497	1589	567	656	3.4	93	0.0585274
sp|A1YFC1|PEG3_GORGO	1589	tr|G1N6N0|G1N6N0_MELGA	707	1497	1589	567	656	3.6	93	0.0585274
sp|A1YFC1|PEG3_GORGO	1589	tr|H0ZGK1|H0ZGK1_TAEGU	709	1497	1589	568	657	3.2	93	0.0585274
sp|A1YFC1|PEG3_GORGO	1589	tr|Q544F9|Q544F9_MOUSE	707	1497	1589	566	655	1.9	93	0.0585274
sp|A1YFC1|PEG3_GORGO	1589	sp|P41183|BCL6_MOUSE	707	1497	1589	566	655	1.9	93	0.0585274
sp|A1YFC1|PEG3_GORGO	1589	tr|B2GUV8|B2GUV8_RAT	707	1497	1589	566	655	1.9	93	0.0585274
sp|A1YFC1|PEG3_GORGO	1589	tr|E1B8E6|E1B8E6_BOVIN	706	1497	1589	565	654	2	93	0.0585274
sp|A1YFC1|PEG3_GORGO	1589	tr|D2H065|D2H065_AILME	706	1497	1589	565	654	1.7	93	0.0585274
sp|A1YFC1|PEG3_GORGO	1589	tr|Q5RB65|Q5RB65_PONAB	706	1497	1589	565	654	1.9	93	0.0585274
sp|A1YFC1|PEG3_GORGO	1589	sp|P41182|BCL6_HUMAN	706	1497	1589	565	654	1.9	93	0.0585274
sp|A1YFC1|PEG3_GORGO	1589	tr|F7AXS6|F7AXS6_HORSE	707	1497	1589	566	655	1.9	93	0.0585274
sp|A1YFC1|PEG3_GORGO	1589	tr|G1K972|G1K972_ANOCA	286	560	649	198	285	7.7	93	0.0585274
sp|A1YFC1|PEG3_GORGO	1589	tr|G3TLE7|G3TLE7_LOXAF	474	1105	1190	357	441	6.3	93	0.0585274
sp|A1YFC1|PEG3_GORGO	1589	tr|Q4SN43|Q4SN43_TETNG	1990	450	537	1303	1394	0.0008	92	0.057898
sp|A1YFC1|PEG3_GORGO	1589	sp|Q9HBT7|ZN287_HUMAN	754	1502	1589	358	441	0.008	91	0.0572687
sp|A1YFC1|PEG3_GORGO	1589	tr|A2T7E2|A2T7E2_PANTR	594	1502	1589	198	281	0.015	91	0.0572687
sp|A1YFC1|PEG3_GORGO	1589	sp|Q5VTD9|GFI1B_HUMAN	330	1499	1589	213	300	0.029	91	0.0572687
sp|A1YFC1|PEG3_GORGO	1589	sp|O70237|GFI1B_MOUSE	330	1499	1589	213	300	0.027	91	0.0572687
sp|A1YFC1|PEG3_GORGO	1589	sp|Q9Y2Y4|ZBT32_HUMAN	487	1163	1252	373	455	0.022	91	0.0572687
sp|A1YFC1|PEG3_GORGO	1589	sp|Q9Y2Y4|ZBT32_HUMAN	487	1107	1190	373	455	8.1	91	0.0572687
sp|A1YFC1|PEG3_GORGO	1589	tr|D2HFS4|D2HFS4_AILME	484	1163	1252	369	451	0.11	91	0.0572687
sp|A1YFC1|PEG3_GORGO	1589	tr|D2HFS4|D2HFS4_AILME	484	1107	1190	369	451	5	91	0.0572687
sp|A1YFC1|PEG3_GORGO	1589	tr|G1L158|G1L158_AILME	488	1163	1252	373	455	0.12	91	0.0572687
sp|A1YFC1|PEG3_GORGO	1589	tr|G1L158|G1L158_AILME	488	1107	1190	373	455	5.5	91	0.0572687
sp|A1YFC1|PEG3_GORGO	1589	tr|F7ASG1|F7ASG1_HORSE	491	1163	1252	375	457	0.22	91	0.0572687
sp|A1YFC1|PEG3_GORGO	1589	tr|F1RLH6|F1RLH6_PIG	477	1163	1252	371	453	0.22	91	0.0572687
sp|A1YFC1|PEG3_GORGO	1589	tr|G3TLE7|G3TLE7_LOXAF	474	1163	1252	359	441	0.26	91	0.0572687
sp|A1YFC1|PEG3_GORGO	1589	tr|E1BHU5|E1BHU5_BOVIN	489	1163	1252	374	456	0.27	91	0.0572687
sp|A1YFC1|PEG3_GORGO	1589	tr|B2RQ06|B2RQ06_MOUSE	465	1163	1252	350	432	0.29	91	0.0572687
sp|A1YFC1|PEG3_GORGO	1589	sp|Q9JKD9|ZBT32_MOUSE	465	1163	1252	350	432	0.29	91	0.0572687
sp|A1YFC1|PEG3_GORGO	1589	tr|D4A2U2|D4A2U2_RAT	483	1163	1252	368	450	0.4	91	0.0572687
sp|A1YFC1|PEG3_GORGO	1589	tr|Q4SN43|Q4SN43_TETNG	1990	1160	1243	913	993	0.03	90	0.0566394
sp|A1YFC1|PEG3_GORGO	1589	tr|Q4RHQ7|Q4RHQ7_TETNG	838	1499	1587	753	838	4.1	89	0.0560101
sp|A1YFC1|PEG3_GORGO	1589	sp|Q9HBT7|ZN287_HUMAN	754	1502	1589	610	693	0.004	88	0.0553807
sp|A1YFC1|PEG3_GORGO	1589	tr|A2T7E2|A2T7E2_PANTR	594	1502	1589	450	533	0.007	88	0.0553807
sp|A1YFC1|PEG3_GORGO	1589	tr|A2D6D2|A2D6D2_MACMU	154	1502	1589	10	93	0.005	88	0.0553807
sp|A1YFC1|PEG3_GORGO	1589	tr|Q4RHQ7|Q4RHQ7_TETNG	838	1502	1589	617	700	0.27	88	0.0553807
sp|A1YFC1|PEG3_GORGO	1589	tr|F7BU74|F7BU74_ORNAN	250	622	707	162	249	0.0007	88	0.0553807
sp|A1YFC1|PEG3_GORGO	1589	tr|F7DGJ3|F7DGJ3_MONDO	298	622	707	210	297	0.001	88	0.0553807
sp|A1YFC1|PEG3_GORGO	1589	tr|F6VNJ8|F6VNJ8_HORSE	303	622	707	215	302	0.002	88	0.0553807
sp|A1YFC1|PEG3_GORGO	1589	tr|G1K972|G1K972_ANOCA	286	622	707	198	285	0.003	88	0.0553807
sp|A1YFC1|PEG3_GORGO	1589	tr|B4X5Z3|B4X5Z3_PIG	283	622	707	195	282	0.003	88	0.0553807
sp|A1YFC1|PEG3_GORGO	1589	tr|F1PXY1|F1PXY1_CANFA	283	622	707	195	282	0.003	88	0.0553807
sp|A1YFC1|PEG3_GORGO	1589	sp|O35819|KLF6_RAT	283	622	707	195	282	0.003	88	0.0553807
sp|A1YFC1|PEG3_GORGO	1589	tr|G1L9N2|G1L9N2_AILME	321	622	707	233	320	0.003	88	0.0553807
sp|A1YFC1|PEG3_GORGO	1589	tr|G1N2A3|G1N2A3_MELGA	249	622	707	161	248	0.003	88	0.0553807
sp|A1YFC1|PEG3_GORGO	1589	tr|Q8BPQ2|Q8BPQ2_MOUSE	318	622	707	230	317	0.003	88	0.0553807
sp|A1YFC1|PEG3_GORGO	1589	sp|Q99612|KLF6_HUMAN	283	622	707	195	282	0.004	88	0.0553807
sp|A1YFC1|PEG3_GORGO	1589	tr|H0YRM0|H0YRM0_TAEGU	284	622	707	196	283	0.004	88	0.0553807
sp|A1YFC1|PEG3_GORGO	1589	tr|Q5ZI79|Q5ZI79_CHICK	283	622	707	195	282	0.004	88	0.0553807
sp|A1YFC1|PEG3_GORGO	1589	tr|G3SYS9|G3SYS9_LOXAF	297	622	707	209	296	0.005	88	0.0553807
sp|A1YFC1|PEG3_GORGO	1589	tr|F6Z3M1|F6Z3M1_HORSE	743	1506	1589	350	430	0.004	87	0.0547514
sp|A1YFC1|PEG3_GORGO	1589	tr|G3TH53|G3TH53_LOXAF	753	1506	1589	360	440	0.001	87	0.0547514
sp|A1YFC1|PEG3_GORGO	1589	tr|F1SDE5|F1SDE5_PIG	760	1506	1589	367	447	0.016	87	0.0547514
sp|A1YFC1|PEG3_GORGO	1589	tr|Q4SN43|Q4SN43_TETNG	1990	1506	1589	1251	1331	0.35	87	0.0547514
sp|A1YFC1|PEG3_GORGO	1589	tr|G3T952|G3T952_LOXAF	708	1279	1358	573	658	0.001	87	0.0547514
sp|A1YFC1|PEG3_GORGO	1589	tr|G1L1V7|G1L1V7_AILME	708	1279	1358	573	658	0.001	87	0.0547514
sp|A1YFC1|PEG3_GORGO	1589	tr|F6XMD7|F6XMD7_ORNAN	713	1279	1358	578	663	0.0008	87	0.0547514
sp|A1YFC1|PEG3_GORGO	1589	tr|D2HGI2|D2HGI2_AILME	281	622	705	195	280	0.009	86	0.0541221
sp|A1YFC1|PEG3_GORGO	1589	tr|G3T952|G3T952_LOXAF	708	624	708	543	627	0.01	85	0.0534928
sp|A1YFC1|PEG3_GORGO	1589	tr|G1L1V7|G1L1V7_AILME	708	624	708	543	627	0.011	85	0.0534928
sp|A1YFC1|PEG3_GORGO	1589	tr|F7C8Q1|F7C8Q1_MONDO	1154	1506	1589	991	1071	1.6	84	0.0528634
sp|A1YFC1|PEG3_GORGO	1589	tr|F6Z3M1|F6Z3M1_HORSE	743	1506	1589	602	682	0.003	84	0.0528634
sp|A1YFC1|PEG3_GORGO	1589	tr|G3TH53|G3TH53_LOXAF	753	1506	1589	612	692	0.004	84	0.0528634
sp|A1YFC1|PEG3_GORGO	1589	tr|F1SDE5|F1SDE5_PIG	760	1506	1589	619	699	0.003	84	0.0528634
sp|A1YFC1|PEG3_GORGO	1589	tr|D4A516|D4A516_RAT	762	1506	1589	394	474	0.0006	84	0.0528634
sp|A1YFC1|PEG3_GORGO	1589	tr|D4A516|D4A516_RAT	762	1506	1589	618	698	0.018	84	0.0528634
sp|A1YFC1|PEG3_GORGO	1589	tr|Q4SN43|Q4SN43_TETNG	1990	562	645	916	993	2e-05	84	0.0528634
sp|A1YFC1|PEG3_GORGO	1589	tr|Q4SN43|Q4SN43_TETNG	1990	1506	1589	1223	1275	2.5	84	0.0528634
sp|A1YFC1|PEG3_GORGO	1589	sp|Q5ZM39|BCL6_CHICK	708	1104	1183	601	680	0.0001	84	0.0528634
sp|A1YFC1|PEG3_GORGO	1589	tr|F1NBN7|F1NBN7_CHICK	708	1104	1183	601	680	0.0001	84	0.0528634
sp|A1YFC1|PEG3_GORGO	1589	tr|G1N6N0|G1N6N0_MELGA	707	1104	1183	601	680	0.0001	84	0.0528634
sp|A1YFC1|PEG3_GORGO	1589	tr|H0ZGK1|H0ZGK1_TAEGU	709	1104	1183	602	681	0.0001	84	0.0528634
sp|A1YFC1|PEG3_GORGO	1589	tr|Q544F9|Q544F9_MOUSE	707	1104	1183	600	679	7e-05	84	0.0528634
sp|A1YFC1|PEG3_GORGO	1589	sp|P41183|BCL6_MOUSE	707	1104	1183	600	679	7e-05	84	0.0528634
sp|A1YFC1|PEG3_GORGO	1589	tr|B2GUV8|B2GUV8_RAT	707	1104	1183	600	679	7e-05	84	0.0528634
sp|A1YFC1|PEG3_GORGO	1589	tr|G3T952|G3T952_LOXAF	708	1506	1589	576	656	2.2	84	0.0528634
sp|A1YFC1|PEG3_GORGO	1589	tr|G1L1V7|G1L1V7_AILME	708	1506	1589	576	656	1.9	84	0.0528634
sp|A1YFC1|PEG3_GORGO	1589	tr|E1B8E6|E1B8E6_BOVIN	706	1104	1183	599	678	8e-05	84	0.0528634
sp|A1YFC1|PEG3_GORGO	1589	tr|D2H065|D2H065_AILME	706	1104	1183	599	678	7e-05	84	0.0528634
sp|A1YFC1|PEG3_GORGO	1589	tr|Q5RB65|Q5RB65_PONAB	706	1104	1183	599	678	7e-05	84	0.0528634
sp|A1YFC1|PEG3_GORGO	1589	sp|P41182|BCL6_HUMAN	706	1104	1183	599	678	7e-05	84	0.0528634
sp|A1YFC1|PEG3_GORGO	1589	tr|F6XMD7|F6XMD7_ORNAN	713	1506	1589	581	661	3.4	84	0.0528634
sp|A1YFC1|PEG3_GORGO	1589	tr|F7AXS6|F7AXS6_HORSE	707	1104	1183	600	679	7e-05	84	0.0528634
sp|A1YFC1|PEG3_GORGO	1589	tr|G3TLE7|G3TLE7_LOXAF	474	453	534	358	441	5.5	84	0.0528634
sp|A1YFC1|PEG3_GORGO	1589	tr|F7C8Q1|F7C8Q1_MONDO	1154	1506	1588	1075	1154	2	83	0.0522341
sp|A1YFC1|PEG3_GORGO	1589	tr|G1K972|G1K972_ANOCA	286	506	588	204	286	0.52	83	0.0522341
sp|A1YFC1|PEG3_GORGO	1589	tr|F6TW92|F6TW92_ORNAN	478	454	529	395	477	0.004	83	0.0522341
sp|A1YFC1|PEG3_GORGO	1589	tr|H0Z7M7|H0Z7M7_TAEGU	295	454	529	212	294	0.004	83	0.0522341
sp|A1YFC1|PEG3_GORGO	1589	tr|Q923V7|Q923V7_RAT	482	454	529	399	481	0.006	83	0.0522341
sp|A1YFC1|PEG3_GORGO	1589	tr|G1MEY5|G1MEY5_AILME	484	454	529	401	483	0.006	83	0.0522341
sp|A1YFC1|PEG3_GORGO	1589	tr|F2YID5|F2YID5_MOUSE	483	454	529	400	482	0.006	83	0.0522341
sp|A1YFC1|PEG3_GORGO	1589	sp|Q60793|KLF4_MOUSE	483	454	529	400	482	0.006	83	0.0522341
sp|A1YFC1|PEG3_GORGO	1589	tr|F6Q2H5|F6Q2H5_HORSE	478	454	529	395	477	0.006	83	0.0522341
sp|A1YFC1|PEG3_GORGO	1589	sp|O43474|KLF4_HUMAN	513	454	529	430	512	0.006	83	0.0522341
sp|A1YFC1|PEG3_GORGO	1589	tr|F7DQ62|F7DQ62_MONDO	507	454	529	424	506	0.006	83	0.0522341
sp|A1YFC1|PEG3_GORGO	1589	tr|G3U0V6|G3U0V6_LOXAF	517	454	529	434	516	0.007	83	0.0522341
sp|A1YFC1|PEG3_GORGO	1589	tr|A7YWE2|A7YWE2_BOVIN	477	454	529	394	476	0.007	83	0.0522341
sp|A1YFC1|PEG3_GORGO	1589	tr|Q52JJ4|Q52JJ4_PIG	510	454	529	427	509	0.008	83	0.0522341
sp|A1YFC1|PEG3_GORGO	1589	tr|F6Z3M1|F6Z3M1_HORSE	743	1513	1587	291	372	0.27	82	0.0516048
sp|A1YFC1|PEG3_GORGO	1589	tr|Q4SN43|Q4SN43_TETNG	1990	1269	1350	934	993	0.001	82	0.0516048
sp|A1YFC1|PEG3_GORGO	1589	tr|F1SDE5|F1SDE5_PIG	760	1513	1587	309	389	0.17	81	0.0509755
sp|A1YFC1|PEG3_GORGO	1589	tr|E1C442|E1C442_CHICK	380	570	649	304	379	8.1	80	0.0503461
sp|A1YFC1|PEG3_GORGO	1589	tr|F7ASG1|F7ASG1_HORSE	491	453	530	374	453	5.2	80	0.0503461
sp|A1YFC1|PEG3_GORGO	1589	tr|E1BHU5|E1BHU5_BOVIN	489	453	530	373	452	9.1	80	0.0503461
sp|A1YFC1|PEG3_GORGO	1589	sp|P18871|ADA2A_PIG	450	1425	1478	235	314	7	80	0.0503461
sp|A1YFC1|PEG3_GORGO	1589	sp|Q5ZM39|BCL6_CHICK	708	1516	1589	494	572	9.4	79	0.0497168
sp|A1YFC1|PEG3_GORGO	1589	tr|F1NBN7|F1NBN7_CHICK	708	1516	1589	494	572	9.3	79	0.0497168
sp|A1YFC1|PEG3_GORGO	1589	tr|G1N6N0|G1N6N0_MELGA	707	1516	1589	494	572	8.8	79	0.0497168
sp|A1YFC1|PEG3_GORGO	1589	sp|Q9Y2Y4|ZBT32_HUMAN	487	454	530	373	451	1.5	79	0.0497168
sp|A1YFC1|PEG3_GORGO	1589	tr|Q4SN43|Q4SN43_TETNG	1990	507	583	919	993	0.0001	77	0.0484581
sp|A1YFC1|PEG3_GORGO	1589	tr|Q4SN43|Q4SN43_TETNG	1990	627	703	919	993	0.0001	77	0.0484581
sp|A1YFC1|PEG3_GORGO	1589	tr|F7BU74|F7BU74_ORNAN	250	512	588	174	250	0.68	77	0.0484581
sp|A1YFC1|PEG3_GORGO	1589	tr|F7DGJ3|F7DGJ3_MONDO	298	512	588	222	298	1.3	77	0.0484581
sp|A1YFC1|PEG3_GORGO	1589	tr|F6VNJ8|F6VNJ8_HORSE	303	512	588	227	303	0.25	77	0.0484581
sp|A1YFC1|PEG3_GORGO	1589	tr|B4X5Z3|B4X5Z3_PIG	283	512	588	207	283	0.74	77	0.0484581
sp|A1YFC1|PEG3_GORGO	1589	tr|F1PXY1|F1PXY1_CANFA	283	512	588	207	283	0.77	77	0.0484581
sp|A1YFC1|PEG3_GORGO	1589	sp|O35819|KLF6_RAT	283	512	588	207	283	0.59	77	0.0484581
sp|A1YFC1|PEG3_GORGO	1589	tr|G1L9N2|G1L9N2_AILME	321	512	588	245	321	1.1	77	0.0484581
sp|A1YFC1|PEG3_GORGO	1589	tr|G1N2A3|G1N2A3_MELGA	249	512	588	173	249	0.87	77	0.0484581
sp|A1YFC1|PEG3_GORGO	1589	tr|Q8BPQ2|Q8BPQ2_MOUSE	318	512	588	242	318	0.72	77	0.0484581
sp|A1YFC1|PEG3_GORGO	1589	sp|Q99612|KLF6_HUMAN	283	512	588	207	283	1.1	77	0.0484581
sp|A1YFC1|PEG3_GORGO	1589	tr|H0YRM0|H0YRM0_TAEGU	284	512	588	208	284	0.93	77	0.0484581
sp|A1YFC1|PEG3_GORGO	1589	tr|Q5ZI79|Q5ZI79_CHICK	283	512	588	207	283	1.2	77	0.0484581
sp|A1YFC1|PEG3_GORGO	1589	tr|F6TW92|F6TW92_ORNAN	478	512	588	402	478	0.017	77	0.0484581
sp|A1YFC1|PEG3_GORGO	1589	tr|H0Z7M7|H0Z7M7_TAEGU	295	512	588	219	295	0.014	77	0.0484581
sp|A1YFC1|PEG3_GORGO	1589	tr|G3SYS9|G3SYS9_LOXAF	297	512	588	221	297	1.4	77	0.0484581
sp|A1YFC1|PEG3_GORGO	1589	tr|Q923V7|Q923V7_RAT	482	512	588	406	482	0.023	77	0.0484581
sp|A1YFC1|PEG3_GORGO	1589	tr|G1MEY5|G1MEY5_AILME	484	512	588	408	484	0.027	77	0.0484581
sp|A1YFC1|PEG3_GORGO	1589	tr|F2YID5|F2YID5_MOUSE	483	512	588	407	483	0.024	77	0.0484581
sp|A1YFC1|PEG3_GORGO	1589	sp|Q60793|KLF4_MOUSE	483	512	588	407	483	0.024	77	0.0484581
sp|A1YFC1|PEG3_GORGO	1589	tr|F6Q2H5|F6Q2H5_HORSE	478	512	588	402	478	0.028	77	0.0484581
sp|A1YFC1|PEG3_GORGO	1589	sp|O43474|KLF4_HUMAN	513	512	588	437	513	0.033	77	0.0484581
sp|A1YFC1|PEG3_GORGO	1589	tr|F7DQ62|F7DQ62_MONDO	507	512	588	431	507	0.01	77	0.0484581
sp|A1YFC1|PEG3_GORGO	1589	tr|G3U0V6|G3U0V6_LOXAF	517	512	588	441	517	0.024	77	0.0484581
sp|A1YFC1|PEG3_GORGO	1589	tr|A7YWE2|A7YWE2_BOVIN	477	512	588	401	477	0.032	77	0.0484581
sp|A1YFC1|PEG3_GORGO	1589	tr|Q52JJ4|Q52JJ4_PIG	510	512	588	434	510	0.036	77	0.0484581
sp|A1YFC1|PEG3_GORGO	1589	tr|G1N228|G1N228_MELGA	241	512	588	165	241	0.034	77	0.0484581
sp|A1YFC1|PEG3_GORGO	1589	tr|E1C442|E1C442_CHICK	380	512	588	304	380	0.032	77	0.0484581
sp|A1YFC1|PEG3_GORGO	1589	sp|Q5T1R4|ZEP3_HUMAN	2406	454	530	192	243	2.9	77	0.0484581
sp|A1YFC1|PEG3_GORGO	1589	sp|A2A884|ZEP3_MOUSE	2348	454	530	185	236	3.3	77	0.0484581
sp|A1YFC1|PEG3_GORGO	1589	tr|Q4SN43|Q4SN43_TETNG	1990	453	525	918	993	1e-06	76	0.0478288
sp|A1YFC1|PEG3_GORGO	1589	tr|F7BU74|F7BU74_ORNAN	250	459	529	174	249	0.73	76	0.0478288
sp|A1YFC1|PEG3_GORGO	1589	tr|F7DGJ3|F7DGJ3_MONDO	298	459	529	222	297	0.88	76	0.0478288
sp|A1YFC1|PEG3_GORGO	1589	tr|F6VNJ8|F6VNJ8_HORSE	303	459	529	227	302	0.34	76	0.0478288
sp|A1YFC1|PEG3_GORGO	1589	tr|G1K972|G1K972_ANOCA	286	459	529	210	285	0.47	76	0.0478288
sp|A1YFC1|PEG3_GORGO	1589	tr|B4X5Z3|B4X5Z3_PIG	283	459	529	207	282	0.52	76	0.0478288
sp|A1YFC1|PEG3_GORGO	1589	tr|F1PXY1|F1PXY1_CANFA	283	459	529	207	282	0.51	76	0.0478288
sp|A1YFC1|PEG3_GORGO	1589	sp|O35819|KLF6_RAT	283	459	529	207	282	0.66	76	0.0478288
sp|A1YFC1|PEG3_GORGO	1589	tr|G1L9N2|G1L9N2_AILME	321	459	529	245	320	0.44	76	0.0478288
sp|A1YFC1|PEG3_GORGO	1589	tr|G1N2A3|G1N2A3_MELGA	249	459	529	173	248	0.47	76	0.0478288
sp|A1YFC1|PEG3_GORGO	1589	tr|Q8BPQ2|Q8BPQ2_MOUSE	318	459	529	242	317	0.47	76	0.0478288
sp|A1YFC1|PEG3_GORGO	1589	sp|Q99612|KLF6_HUMAN	283	459	529	207	282	0.7	76	0.0478288
sp|A1YFC1|PEG3_GORGO	1589	tr|H0YRM0|H0YRM0_TAEGU	284	459	529	208	283	0.53	76	0.0478288
sp|A1YFC1|PEG3_GORGO	1589	tr|Q5ZI79|Q5ZI79_CHICK	283	459	529	207	282	0.58	76	0.0478288
sp|A1YFC1|PEG3_GORGO	1589	tr|F6TW92|F6TW92_ORNAN	478	632	707	402	477	0.021	76	0.0478288
sp|A1YFC1|PEG3_GORGO	1589	tr|H0Z7M7|H0Z7M7_TAEGU	295	632	707	219	294	0.01	76	0.0478288
sp|A1YFC1|PEG3_GORGO	1589	tr|G3SYS9|G3SYS9_LOXAF	297	459	529	221	296	0.83	76	0.0478288
sp|A1YFC1|PEG3_GORGO	1589	tr|Q923V7|Q923V7_RAT	482	632	707	406	481	0.023	76	0.0478288
sp|A1YFC1|PEG3_GORGO	1589	tr|G1MEY5|G1MEY5_AILME	484	632	707	408	483	0.022	76	0.0478288
sp|A1YFC1|PEG3_GORGO	1589	tr|F2YID5|F2YID5_MOUSE	483	632	707	407	482	0.023	76	0.0478288
sp|A1YFC1|PEG3_GORGO	1589	sp|Q60793|KLF4_MOUSE	483	632	707	407	482	0.023	76	0.0478288
sp|A1YFC1|PEG3_GORGO	1589	tr|F6Q2H5|F6Q2H5_HORSE	478	632	707	402	477	0.028	76	0.0478288
sp|A1YFC1|PEG3_GORGO	1589	sp|O43474|KLF4_HUMAN	513	632	707	437	512	0.022	76	0.0478288
sp|A1YFC1|PEG3_GORGO	1589	tr|F7DQ62|F7DQ62_MONDO	507	632	707	431	506	0.014	76	0.0478288
sp|A1YFC1|PEG3_GORGO	1589	tr|F7DQ62|F7DQ62_MONDO	507	1112	1185	431	506	8	76	0.0478288
sp|A1YFC1|PEG3_GORGO	1589	tr|G3U0V6|G3U0V6_LOXAF	517	632	707	441	516	0.025	76	0.0478288
sp|A1YFC1|PEG3_GORGO	1589	tr|A7YWE2|A7YWE2_BOVIN	477	632	707	401	476	0.021	76	0.0478288
sp|A1YFC1|PEG3_GORGO	1589	tr|Q52JJ4|Q52JJ4_PIG	510	632	707	434	509	0.029	76	0.0478288
sp|A1YFC1|PEG3_GORGO	1589	tr|G1N228|G1N228_MELGA	241	459	529	165	240	0.019	76	0.0478288
sp|A1YFC1|PEG3_GORGO	1589	tr|G1N228|G1N228_MELGA	241	632	707	165	240	0.019	76	0.0478288
sp|A1YFC1|PEG3_GORGO	1589	tr|E1C442|E1C442_CHICK	380	632	707	304	379	0.023	76	0.0478288
sp|A1YFC1|PEG3_GORGO	1589	tr|E1C442|E1C442_CHICK	380	459	529	304	379	0.035	76	0.0478288
sp|A1YFC1|PEG3_GORGO	1589	tr|G3TH53|G3TH53_LOXAF	753	1520	1587	308	382	0.059	75	0.0471995
sp|A1YFC1|PEG3_GORGO	1589	tr|D2HGI2|D2HGI2_AILME	281	459	527	207	280	1.5	74	0.0465702
sp|A1YFC1|PEG3_GORGO	1589	tr|D2HGI2|D2HGI2_AILME	281	512	585	207	280	3.5	74	0.0465702
sp|A1YFC1|PEG3_GORGO	1589	sp|Q8TD23|ZN675_HUMAN	568	416	484	506	566	0.014	69	0.0434235
sp|A1YFC1|PEG3_GORGO	1589	tr|Q4SN43|Q4SN43_TETNG	1990	605	666	925	984	0.005	62	0.0390183
sp|A1YFC1|PEG3_GORGO	1589	tr|F6TW92|F6TW92_ORNAN	478	1150	1200	412	464	0.95	53	0.0333543
sp|A1YFC1|PEG3_GORGO	1589	tr|H0Z7M7|H0Z7M7_TAEGU	295	1150	1200	229	281	1.8	53	0.0333543
sp|A1YFC1|PEG3_GORGO	1589	tr|Q923V7|Q923V7_RAT	482	1150	1200	416	468	1.7	53	0.0333543
sp|A1YFC1|PEG3_GORGO	1589	tr|G1MEY5|G1MEY5_AILME	484	1150	1200	418	470	1.5	53	0.0333543
sp|A1YFC1|PEG3_GORGO	1589	tr|F2YID5|F2YID5_MOUSE	483	1150	1200	417	469	1.6	53	0.0333543
sp|A1YFC1|PEG3_GORGO	1589	sp|Q60793|KLF4_MOUSE	483	1150	1200	417	469	1.6	53	0.0333543
sp|A1YFC1|PEG3_GORGO	1589	tr|F6Q2H5|F6Q2H5_HORSE	478	1150	1200	412	464	2	53	0.0333543
sp|A1YFC1|PEG3_GORGO	1589	sp|O43474|KLF4_HUMAN	513	1150	1200	447	499	1.7	53	0.0333543
sp|A1YFC1|PEG3_GORGO	1589	tr|F7DQ62|F7DQ62_MONDO	507	1150	1200	441	493	1.9	53	0.0333543
sp|A1YFC1|PEG3_GORGO	1589	tr|G3U0V6|G3U0V6_LOXAF	517	1150	1200	451	503	1.7	53	0.0333543
sp|A1YFC1|PEG3_GORGO	1589	tr|A7YWE2|A7YWE2_BOVIN	477	1150	1200	411	463	1.8	53	0.0333543
sp|A1YFC1|PEG3_GORGO	1589	tr|Q52JJ4|Q52JJ4_PIG	510	1150	1200	444	496	2.1	53	0.0333543
sp|A1YFC1|PEG3_GORGO	1589	tr|Q544F9|Q544F9_MOUSE	707	969	1009	575	620	5.8	46	0.028949
sp|A1YFC1|PEG3_GORGO	1589	sp|P41183|BCL6_MOUSE	707	969	1009	575	620	5.8	46	0.028949
sp|A1YFC1|PEG3_GORGO	1589	tr|B2GUV8|B2GUV8_RAT	707	969	1009	575	620	5.9	46	0.028949
sp|A1YFC1|PEG3_GORGO	1589	tr|G3T952|G3T952_LOXAF	708	969	1009	576	621	5.7	46	0.028949
sp|A1YFC1|PEG3_GORGO	1589	tr|G1L1V7|G1L1V7_AILME	708	969	1009	576	621	5.6	46	0.028949
sp|A1YFC1|PEG3_GORGO	1589	tr|E1B8E6|E1B8E6_BOVIN	706	969	1009	574	619	5.8	46	0.028949
sp|A1YFC1|PEG3_GORGO	1589	tr|D2H065|D2H065_AILME	706	969	1009	574	619	5.5	46	0.028949
sp|A1YFC1|PEG3_GORGO	1589	tr|Q5RB65|Q5RB65_PONAB	706	969	1009	574	619	5.9	46	0.028949
sp|A1YFC1|PEG3_GORGO	1589	sp|P41182|BCL6_HUMAN	706	969	1009	574	619	5.8	46	0.028949
sp|A1YFC1|PEG3_GORGO	1589	tr|F6XMD7|F6XMD7_ORNAN	713	969	1009	581	626	5.9	46	0.028949
sp|A1YFC1|PEG3_GORGO	1589	tr|F7AXS6|F7AXS6_HORSE	707	969	1009	575	620	5.8	46	0.028949
sp|A1YFC1|PEG3_GORGO	1589	tr|G1L1V7|G1L1V7_AILME	708	1546	1589	527	570	9.6	44	0.0276904
sp|A1YFC1|PEG3_GORGO	1589	tr|Q7Z3W8|Q7Z3W8_HUMAN	58	488	529	16	57	6.2	42	0.0264317
sp|A1YFC1|PEG3_GORGO	1589	sp|Q5T1R4|ZEP3_HUMAN	2406	1150	1185	207	242	0.28	36	0.0226558
sp|A1YFC1|PEG3_GORGO	1589	sp|A2A884|ZEP3_MOUSE	2348	1150	1185	200	235	0.29	36	0.0226558
sp|A1YFC1|PEG3_GORGO	1589	tr|F7ASG1|F7ASG1_HORSE	491	623	655	371	403	3.2	33	0.0207678
sp|A1YFC1|PEG3_GORGO	1589	tr|E1BHU5|E1BHU5_BOVIN	489	623	655	370	402	2.8	33	0.0207678
sp|A1YFC1|PEG3_GORGO	1589	tr|D4A516|D4A516_RAT	762	1558	1589	387	418	1.7	32	0.0201385
sp|A1YFC1|PEG3_GORGO	1589	tr|G3TLE7|G3TLE7_LOXAF	474	625	655	357	387	4	31	0.0195091
sp|A1YFC1|PEG3_GORGO	1589	sp|Q9Y2Y4|ZBT32_HUMAN	487	627	655	373	401	4.5	29	0.0182505
sp|A1YFC1|PEG3_GORGO	1589	tr|D2HFS4|D2HFS4_AILME	484	627	655	369	397	2.3	29	0.0182505
sp|A1YFC1|PEG3_GORGO	1589	tr|G1L158|G1L158_AILME	488	627	655	373	401	2.3	29	0.0182505
sp|A1YFC1|PEG3_GORGO	1589	tr|F1RLH6|F1RLH6_PIG	477	627	655	371	399	4.6	29	0.0182505
sp|A1YFC1|PEG3_GORGO	1589	sp|Q5VTD9|GFI1B_HUMAN	330	969	996	248	275	0.83	28	0.0176211
sp|A1YFC1|PEG3_GORGO	1589	sp|Q5VTD9|GFI1B_HUMAN	330	969	996	220	247	3.3	28	0.0176211
sp|A1YFC1|PEG3_GORGO	1589	sp|O70237|GFI1B_MOUSE	330	969	996	248	275	0.7	28	0.0176211
sp|A1YFC1|PEG3_GORGO	1589	tr|Q4SN43|Q4SN43_TETNG	1990	969	996	919	946	0.004	28	0.0176211
sp|A1YFC1|PEG3_GORGO	1589	sp|Q5ZM39|BCL6_CHICK	708	969	996	632	659	4	28	0.0176211
sp|A1YFC1|PEG3_GORGO	1589	sp|Q5ZM39|BCL6_CHICK	708	969	996	576	603	6.4	28	0.0176211
sp|A1YFC1|PEG3_GORGO	1589	tr|F1NBN7|F1NBN7_CHICK	708	969	996	632	659	4	28	0.0176211
sp|A1YFC1|PEG3_GORGO	1589	tr|F1NBN7|F1NBN7_CHICK	708	969	996	576	603	6.4	28	0.0176211
sp|A1YFC1|PEG3_GORGO	1589	tr|G1N6N0|G1N6N0_MELGA	707	969	996	632	659	4	28	0.0176211
sp|A1YFC1|PEG3_GORGO	1589	tr|G1N6N0|G1N6N0_MELGA	707	969	996	576	603	6.6	28	0.0176211
sp|A1YFC1|PEG3_GORGO	1589	tr|H0ZGK1|H0ZGK1_TAEGU	709	969	996	633	660	4	28	0.0176211
sp|A1YFC1|PEG3_GORGO	1589	tr|H0ZGK1|H0ZGK1_TAEGU	709	969	996	577	604	6.4	28	0.0176211
sp|A1YFC1|PEG3_GORGO	1589	tr|Q544F9|Q544F9_MOUSE	707	969	996	631	658	4.4	28	0.0176211
sp|A1YFC1|PEG3_GORGO	1589	sp|P41183|BCL6_MOUSE	707	969	996	631	658	4.4	28	0.0176211
sp|A1YFC1|PEG3_GORGO	1589	tr|B2GUV8|B2GUV8_RAT	707	969	996	631	658	4.3	28	0.0176211
sp|A1YFC1|PEG3_GORGO	1589	tr|G3T952|G3T952_LOXAF	708	1562	1589	573	600	2.7	28	0.0176211
sp|A1YFC1|PEG3_GORGO	1589	tr|G3T952|G3T952_LOXAF	708	969	996	632	659	4.3	28	0.0176211
sp|A1YFC1|PEG3_GORGO	1589	tr|G1L1V7|G1L1V7_AILME	708	1562	1589	573	600	2.6	28	0.0176211
sp|A1YFC1|PEG3_GORGO	1589	tr|G1L1V7|G1L1V7_AILME	708	969	996	632	659	4.2	28	0.0176211
sp|A1YFC1|PEG3_GORGO	1589	tr|E1B8E6|E1B8E6_BOVIN	706	969	996	630	657	4.3	28	0.0176211
sp|A1YFC1|PEG3_GORGO	1589	tr|D2H065|D2H065_AILME	706	969	996	630	657	4.4	28	0.0176211
sp|A1YFC1|PEG3_GORGO	1589	tr|Q5RB65|Q5RB65_PONAB	706	969	996	630	657	4.2	28	0.0176211
sp|A1YFC1|PEG3_GORGO	1589	sp|P41182|BCL6_HUMAN	706	969	996	630	657	4.2	28	0.0176211
sp|A1YFC1|PEG3_GORGO	1589	tr|F6XMD7|F6XMD7_ORNAN	713	969	996	637	664	4.1	28	0.0176211
sp|A1YFC1|PEG3_GORGO	1589	tr|F7AXS6|F7AXS6_HORSE	707	969	996	631	658	4.4	28	0.0176211
sp|A1YFC1|PEG3_GORGO	1589	tr|A2D6D2|A2D6D2_MACMU	154	969	995	125	151	1.7	27	0.0169918
sp|A1YFC1|PEG3_GORGO	1589	tr|A2D6D2|A2D6D2_MACMU	154	1332	1358	13	39	6.4	27	0.0169918
sp|A1YFC1|PEG3_GORGO	1589	sp|Q5VTD9|GFI1B_HUMAN	330	1565	1588	192	215	3	24	0.0151038
sp|A1YFC1|PEG3_GORGO	1589	sp|O70237|GFI1B_MOUSE	330	1565	1588	192	215	1.8	24	0.0151038
sp|A1YFC1|PEG3_GORGO 最大值										0.683449
sp|A1YGK6|PEG3_PANPA	1588	tr|F7C8Q1|F7C8Q1_MONDO	1154	355	1357	96	1100	4e-76	1075	0.676952
sp|A1YGK6|PEG3_PANPA	1588	tr|F7C8Q1|F7C8Q1_MONDO	1154	544	1588	95	1015	1e-54	1075	0.676952
sp|A1YGK6|PEG3_PANPA	1588	tr|F7C8Q1|F7C8Q1_MONDO	1154	460	1358	94	902	1e-68	909	0.572418
sp|A1YGK6|PEG3_PANPA	1588	tr|F7C8Q1|F7C8Q1_MONDO	1154	416	1247	310	1153	2e-62	885	0.557305
sp|A1YGK6|PEG3_PANPA	1588	sp|Q9HBT7|ZN287_HUMAN	754	30	822	26	750	3e-73	817	0.514484
sp|A1YGK6|PEG3_PANPA	1588	tr|G3TH53|G3TH53_LOXAF	753	30	818	26	745	1e-69	808	0.508816
sp|A1YGK6|PEG3_PANPA	1588	tr|F6Z3M1|F6Z3M1_HORSE	743	41	822	26	739	4e-75	806	0.507557
sp|A1YGK6|PEG3_PANPA	1588	tr|F7C8Q1|F7C8Q1_MONDO	1154	416	1130	422	1154	1e-51	781	0.491814
sp|A1YGK6|PEG3_PANPA	1588	tr|F1SDE5|F1SDE5_PIG	760	30	764	33	754	5e-69	766	0.482368
sp|A1YGK6|PEG3_PANPA	1588	tr|A2T7E2|A2T7E2_PANTR	594	317	822	86	590	2e-50	530	0.333753
sp|A1YGK6|PEG3_PANPA	1588	tr|Q5SVS9|Q5SVS9_MOUSE	748	619	1130	347	742	7e-14	512	0.322418
sp|A1YGK6|PEG3_PANPA	1588	sp|Q9EQB9|ZN287_MOUSE	759	619	1130	358	753	9e-14	512	0.322418
sp|A1YGK6|PEG3_PANPA	1588	tr|F6Z3M1|F6Z3M1_HORSE	743	635	1130	330	737	1e-17	496	0.312343
sp|A1YGK6|PEG3_PANPA	1588	sp|Q9HBT7|ZN287_HUMAN	754	635	1130	341	748	2e-17	496	0.312343
sp|A1YGK6|PEG3_PANPA	1588	tr|A2T7E2|A2T7E2_PANTR	594	635	1130	181	588	1e-17	496	0.312343
sp|A1YGK6|PEG3_PANPA	1588	tr|F1SDE5|F1SDE5_PIG	760	636	1130	348	754	1e-16	495	0.311713
sp|A1YGK6|PEG3_PANPA	1588	tr|F1SDE5|F1SDE5_PIG	760	341	822	286	756	9e-49	494	0.311083
sp|A1YGK6|PEG3_PANPA	1588	tr|D4A516|D4A516_RAT	762	371	828	312	761	9e-47	471	0.296599
sp|A1YGK6|PEG3_PANPA	1588	tr|G3TH53|G3TH53_LOXAF	753	739	1185	358	746	3e-17	458	0.288413
sp|A1YGK6|PEG3_PANPA	1588	tr|A2T7E2|A2T7E2_PANTR	594	739	1185	199	587	2e-17	458	0.288413
sp|A1YGK6|PEG3_PANPA	1588	sp|Q9HBT7|ZN287_HUMAN	754	556	995	352	751	1e-27	441	0.277708
sp|A1YGK6|PEG3_PANPA	1588	sp|Q8TD23|ZN675_HUMAN	568	1161	1588	142	560	2e-16	441	0.277708
sp|A1YGK6|PEG3_PANPA	1588	tr|A2T7E2|A2T7E2_PANTR	594	556	995	192	591	6e-28	440	0.277078
sp|A1YGK6|PEG3_PANPA	1588	tr|G3TH53|G3TH53_LOXAF	753	557	995	352	750	3e-29	439	0.276448
sp|A1YGK6|PEG3_PANPA	1588	tr|G3TH53|G3TH53_LOXAF	753	569	1000	308	727	2e-24	436	0.274559
sp|A1YGK6|PEG3_PANPA	1588	sp|Q8TD23|ZN675_HUMAN	568	625	1057	142	562	2e-18	434	0.2733
sp|A1YGK6|PEG3_PANPA	1588	tr|A2T7E2|A2T7E2_PANTR	594	571	1000	179	568	1e-23	433	0.27267
sp|A1YGK6|PEG3_PANPA	1588	tr|F6Z3M1|F6Z3M1_HORSE	743	571	1000	328	717	1e-23	431	0.271411
sp|A1YGK6|PEG3_PANPA	1588	sp|Q9HBT7|ZN287_HUMAN	754	571	1000	339	728	2e-23	431	0.271411
sp|A1YGK6|PEG3_PANPA	1588	tr|F1SDE5|F1SDE5_PIG	760	571	1000	345	734	9e-23	431	0.271411
sp|A1YGK6|PEG3_PANPA	1588	tr|Q5SVS9|Q5SVS9_MOUSE	748	398	822	335	744	3e-46	431	0.271411
sp|A1YGK6|PEG3_PANPA	1588	sp|Q9EQB9|ZN287_MOUSE	759	398	822	346	755	3e-46	431	0.271411
sp|A1YGK6|PEG3_PANPA	1588	tr|G3TH53|G3TH53_LOXAF	753	362	765	348	748	6e-46	419	0.263854
sp|A1YGK6|PEG3_PANPA	1588	tr|G3TH53|G3TH53_LOXAF	753	906	1304	352	746	3e-27	414	0.260705
sp|A1YGK6|PEG3_PANPA	1588	sp|Q8TD23|ZN675_HUMAN	568	505	911	170	561	4e-32	412	0.259446
sp|A1YGK6|PEG3_PANPA	1588	sp|Q8TD23|ZN675_HUMAN	568	453	856	171	567	1e-36	407	0.256297
sp|A1YGK6|PEG3_PANPA	1588	tr|Q5SVS9|Q5SVS9_MOUSE	748	368	739	355	745	9e-40	403	0.253778
sp|A1YGK6|PEG3_PANPA	1588	sp|Q9EQB9|ZN287_MOUSE	759	368	739	366	756	1e-39	403	0.253778
sp|A1YGK6|PEG3_PANPA	1588	sp|Q8TD23|ZN675_HUMAN	568	968	1361	227	565	2e-28	403	0.253778
sp|A1YGK6|PEG3_PANPA	1588	tr|G3TH53|G3TH53_LOXAF	753	969	1357	360	693	9e-30	402	0.253149
sp|A1YGK6|PEG3_PANPA	1588	tr|Q5SVS9|Q5SVS9_MOUSE	748	969	1354	383	741	9e-32	401	0.252519
sp|A1YGK6|PEG3_PANPA	1588	sp|Q9EQB9|ZN287_MOUSE	759	969	1354	394	752	1e-31	401	0.252519
sp|A1YGK6|PEG3_PANPA	1588	tr|D4A516|D4A516_RAT	762	605	1000	372	733	3e-22	397	0.25
sp|A1YGK6|PEG3_PANPA	1588	tr|Q5SVS9|Q5SVS9_MOUSE	748	605	1000	361	722	2e-22	397	0.25
sp|A1YGK6|PEG3_PANPA	1588	sp|Q9EQB9|ZN287_MOUSE	759	605	1000	372	733	3e-22	397	0.25
sp|A1YGK6|PEG3_PANPA	1588	sp|Q8TD23|ZN675_HUMAN	568	969	1358	172	534	6e-35	397	0.25
sp|A1YGK6|PEG3_PANPA	1588	tr|Q4RHQ7|Q4RHQ7_TETNG	838	959	1354	526	838	1e-15	396	0.24937
sp|A1YGK6|PEG3_PANPA	1588	tr|G3TH53|G3TH53_LOXAF	753	968	1354	387	746	1e-31	394	0.248111
sp|A1YGK6|PEG3_PANPA	1588	tr|D4A516|D4A516_RAT	762	969	1355	394	753	8e-32	394	0.248111
sp|A1YGK6|PEG3_PANPA	1588	tr|F6Z3M1|F6Z3M1_HORSE	743	969	1354	378	736	8e-32	393	0.247481
sp|A1YGK6|PEG3_PANPA	1588	tr|F6Z3M1|F6Z3M1_HORSE	743	978	1357	331	683	8e-31	393	0.247481
sp|A1YGK6|PEG3_PANPA	1588	sp|Q9HBT7|ZN287_HUMAN	754	969	1354	389	747	1e-31	393	0.247481
sp|A1YGK6|PEG3_PANPA	1588	sp|Q9HBT7|ZN287_HUMAN	754	978	1357	342	694	7e-30	393	0.247481
sp|A1YGK6|PEG3_PANPA	1588	tr|F1SDE5|F1SDE5_PIG	760	969	1354	395	753	1e-31	393	0.247481
sp|A1YGK6|PEG3_PANPA	1588	tr|F1SDE5|F1SDE5_PIG	760	978	1357	348	700	3e-30	393	0.247481
sp|A1YGK6|PEG3_PANPA	1588	tr|A2T7E2|A2T7E2_PANTR	594	969	1354	229	587	5e-32	393	0.247481
sp|A1YGK6|PEG3_PANPA	1588	tr|A2T7E2|A2T7E2_PANTR	594	978	1357	182	534	1e-30	393	0.247481
sp|A1YGK6|PEG3_PANPA	1588	tr|F6Z3M1|F6Z3M1_HORSE	743	813	1185	394	736	4e-17	386	0.243073
sp|A1YGK6|PEG3_PANPA	1588	sp|Q9HBT7|ZN287_HUMAN	754	813	1185	405	747	5e-17	386	0.243073
sp|A1YGK6|PEG3_PANPA	1588	tr|F1SDE5|F1SDE5_PIG	760	813	1185	411	753	6e-17	386	0.243073
sp|A1YGK6|PEG3_PANPA	1588	tr|D4A516|D4A516_RAT	762	813	1185	410	752	9e-19	386	0.243073
sp|A1YGK6|PEG3_PANPA	1588	tr|Q5SVS9|Q5SVS9_MOUSE	748	813	1185	399	741	5e-17	386	0.243073
sp|A1YGK6|PEG3_PANPA	1588	sp|Q9EQB9|ZN287_MOUSE	759	813	1185	410	752	6e-17	386	0.243073
sp|A1YGK6|PEG3_PANPA	1588	tr|Q5SVS9|Q5SVS9_MOUSE	748	998	1357	351	688	4e-30	373	0.234887
sp|A1YGK6|PEG3_PANPA	1588	sp|Q9EQB9|ZN287_MOUSE	759	998	1357	362	699	6e-30	373	0.234887
sp|A1YGK6|PEG3_PANPA	1588	tr|D4A516|D4A516_RAT	762	503	849	362	698	5e-33	347	0.218514
sp|A1YGK6|PEG3_PANPA	1588	tr|Q5SVS9|Q5SVS9_MOUSE	748	503	849	351	687	1e-33	347	0.218514
sp|A1YGK6|PEG3_PANPA	1588	sp|Q9EQB9|ZN287_MOUSE	759	503	849	362	698	1e-33	347	0.218514
sp|A1YGK6|PEG3_PANPA	1588	sp|Q8TD23|ZN675_HUMAN	568	414	736	252	559	3e-43	326	0.20529
sp|A1YGK6|PEG3_PANPA	1588	tr|Q4RHQ7|Q4RHQ7_TETNG	838	454	752	536	827	2e-17	302	0.190176
sp|A1YGK6|PEG3_PANPA	1588	tr|G3TH53|G3TH53_LOXAF	753	1102	1354	355	634	2e-25	287	0.18073
sp|A1YGK6|PEG3_PANPA	1588	tr|D4A516|D4A516_RAT	762	1102	1354	361	640	1e-22	287	0.18073
sp|A1YGK6|PEG3_PANPA	1588	tr|Q5SVS9|Q5SVS9_MOUSE	748	1102	1354	350	629	2e-23	287	0.18073
sp|A1YGK6|PEG3_PANPA	1588	sp|Q9EQB9|ZN287_MOUSE	759	1102	1354	361	640	2e-23	287	0.18073
sp|A1YGK6|PEG3_PANPA	1588	tr|D4A516|D4A516_RAT	762	1090	1357	433	699	7e-29	281	0.176952
sp|A1YGK6|PEG3_PANPA	1588	tr|Q4SN43|Q4SN43_TETNG	1990	454	680	1120	1387	6e-11	278	0.175063
sp|A1YGK6|PEG3_PANPA	1588	sp|Q8TD23|ZN675_HUMAN	568	1103	1358	168	422	8e-24	266	0.167506
sp|A1YGK6|PEG3_PANPA	1588	tr|Q4RHQ7|Q4RHQ7_TETNG	838	1090	1355	520	727	3e-11	266	0.167506
sp|A1YGK6|PEG3_PANPA	1588	tr|Q4RHQ7|Q4RHQ7_TETNG	838	453	707	591	838	6e-16	258	0.162469
sp|A1YGK6|PEG3_PANPA	1588	sp|Q5VTD9|GFI1B_HUMAN	330	422	666	124	313	2e-13	252	0.15869
sp|A1YGK6|PEG3_PANPA	1588	sp|O70237|GFI1B_MOUSE	330	422	666	124	313	2e-12	252	0.15869
sp|A1YGK6|PEG3_PANPA	1588	sp|Q8TD23|ZN675_HUMAN	568	416	657	338	565	1e-33	245	0.154282
sp|A1YGK6|PEG3_PANPA	1588	sp|Q8TD23|ZN675_HUMAN	568	359	594	387	565	2e-14	239	0.150504
sp|A1YGK6|PEG3_PANPA	1588	tr|Q4SN43|Q4SN43_TETNG	1990	969	1185	1223	1386	0.0002	221	0.139169
sp|A1YGK6|PEG3_PANPA	1588	tr|A2D6D2|A2D6D2_MACMU	154	969	1185	13	147	2e-08	217	0.13665
sp|A1YGK6|PEG3_PANPA	1588	tr|Q4SN43|Q4SN43_TETNG	1990	1159	1354	1219	1386	3e-06	211	0.132872
sp|A1YGK6|PEG3_PANPA	1588	tr|Q4SN43|Q4SN43_TETNG	1990	1102	1304	1218	1386	2e-08	209	0.131612
sp|A1YGK6|PEG3_PANPA	1588	tr|F6XMD7|F6XMD7_ORNAN	713	1151	1350	512	683	1e-05	208	0.130982
sp|A1YGK6|PEG3_PANPA	1588	tr|F7ASG1|F7ASG1_HORSE	491	1004	1190	264	457	0.91	208	0.130982
sp|A1YGK6|PEG3_PANPA	1588	tr|Q4SN43|Q4SN43_TETNG	1990	450	652	1219	1389	5e-10	204	0.128463
sp|A1YGK6|PEG3_PANPA	1588	sp|Q5ZM39|BCL6_CHICK	708	453	647	547	680	2e-08	195	0.122796
sp|A1YGK6|PEG3_PANPA	1588	tr|F1NBN7|F1NBN7_CHICK	708	453	647	547	680	2e-08	195	0.122796
sp|A1YGK6|PEG3_PANPA	1588	tr|G1N6N0|G1N6N0_MELGA	707	453	647	547	680	2e-08	195	0.122796
sp|A1YGK6|PEG3_PANPA	1588	tr|H0ZGK1|H0ZGK1_TAEGU	709	453	647	548	681	2e-08	195	0.122796
sp|A1YGK6|PEG3_PANPA	1588	tr|B2GUV8|B2GUV8_RAT	707	453	647	546	679	1e-08	195	0.122796
sp|A1YGK6|PEG3_PANPA	1588	tr|Q544F9|Q544F9_MOUSE	707	453	647	546	679	2e-08	195	0.122796
sp|A1YGK6|PEG3_PANPA	1588	sp|P41183|BCL6_MOUSE	707	453	647	546	679	2e-08	195	0.122796
sp|A1YGK6|PEG3_PANPA	1588	tr|G3T952|G3T952_LOXAF	708	453	647	545	680	4e-09	195	0.122796
sp|A1YGK6|PEG3_PANPA	1588	tr|G1L1V7|G1L1V7_AILME	708	453	647	545	680	7e-09	195	0.122796
sp|A1YGK6|PEG3_PANPA	1588	tr|E1B8E6|E1B8E6_BOVIN	706	453	647	545	678	2e-08	195	0.122796
sp|A1YGK6|PEG3_PANPA	1588	tr|D2H065|D2H065_AILME	706	453	647	545	678	2e-08	195	0.122796
sp|A1YGK6|PEG3_PANPA	1588	tr|F7AXS6|F7AXS6_HORSE	707	453	647	546	679	2e-08	195	0.122796
sp|A1YGK6|PEG3_PANPA	1588	tr|F6XMD7|F6XMD7_ORNAN	713	453	647	551	685	1e-08	195	0.122796
sp|A1YGK6|PEG3_PANPA	1588	tr|Q5RB65|Q5RB65_PONAB	706	453	647	545	678	2e-08	195	0.122796
sp|A1YGK6|PEG3_PANPA	1588	sp|P41182|BCL6_HUMAN	706	453	647	545	678	2e-08	195	0.122796
sp|A1YGK6|PEG3_PANPA	1588	tr|Q4RHQ7|Q4RHQ7_TETNG	838	693	882	544	734	2.1	193	0.121537
sp|A1YGK6|PEG3_PANPA	1588	sp|Q5ZM39|BCL6_CHICK	708	476	655	487	660	1e-09	184	0.115869
sp|A1YGK6|PEG3_PANPA	1588	tr|F1NBN7|F1NBN7_CHICK	708	476	655	487	660	1e-09	184	0.115869
sp|A1YGK6|PEG3_PANPA	1588	tr|G1N6N0|G1N6N0_MELGA	707	476	655	487	660	1e-09	184	0.115869
sp|A1YGK6|PEG3_PANPA	1588	tr|H0ZGK1|H0ZGK1_TAEGU	709	476	655	488	661	2e-09	184	0.115869
sp|A1YGK6|PEG3_PANPA	1588	tr|B2GUV8|B2GUV8_RAT	707	476	655	486	659	3e-09	184	0.115869
sp|A1YGK6|PEG3_PANPA	1588	tr|Q544F9|Q544F9_MOUSE	707	476	655	486	659	3e-09	184	0.115869
sp|A1YGK6|PEG3_PANPA	1588	sp|P41183|BCL6_MOUSE	707	476	655	486	659	3e-09	184	0.115869
sp|A1YGK6|PEG3_PANPA	1588	tr|E1B8E6|E1B8E6_BOVIN	706	476	655	485	658	8e-09	184	0.115869
sp|A1YGK6|PEG3_PANPA	1588	tr|D2H065|D2H065_AILME	706	476	655	485	658	1e-08	184	0.115869
sp|A1YGK6|PEG3_PANPA	1588	tr|F7AXS6|F7AXS6_HORSE	707	476	655	486	659	1e-08	184	0.115869
sp|A1YGK6|PEG3_PANPA	1588	tr|Q5RB65|Q5RB65_PONAB	706	476	655	485	658	1e-08	184	0.115869
sp|A1YGK6|PEG3_PANPA	1588	sp|P41182|BCL6_HUMAN	706	476	655	485	658	1e-08	184	0.115869
sp|A1YGK6|PEG3_PANPA	1588	tr|B2RQ06|B2RQ06_MOUSE	465	1046	1190	276	432	0.92	169	0.106423
sp|A1YGK6|PEG3_PANPA	1588	sp|Q9JKD9|ZBT32_MOUSE	465	1046	1190	276	432	2.7	169	0.106423
sp|A1YGK6|PEG3_PANPA	1588	tr|G1L1V7|G1L1V7_AILME	708	368	527	546	680	0.005	166	0.104534
sp|A1YGK6|PEG3_PANPA	1588	tr|G1N228|G1N228_MELGA	241	1165	1304	82	240	0.056	166	0.104534
[truncated: 168,221 more rows]

## Sheet: sameseq
query seq	query len	known seq	known len	query start	query end	known start	known end	Evalue	match len	match len/query len
sp|Q61337|BAD_MOUSE	204	sp|Q61337|BAD_MOUSE	204	1	204	1	204	3e-146	204	1
sp|P10809|CH60_HUMAN	573	sp|P10809|CH60_HUMAN	573	1	573	1	573	0	573	1
sp|Q7Z7G1|CLNK_HUMAN	428	sp|Q7Z7G1|CLNK_HUMAN	428	1	428	1	428	0	428	1
sp|P07141|CSF1_MOUSE	552	sp|P07141|CSF1_MOUSE	552	1	552	1	552	0	552	1
sp|Q8JZQ0|CSF1_RAT	566	sp|Q8JZQ0|CSF1_RAT	566	1	566	1	566	0	566	1
sp|Q9MZF4|DUOX1_CANFA	1551	sp|Q9MZF4|DUOX1_CANFA	1551	1	1551	1	1551	0	1551	1
sp|Q8HZK2|DUOX2_PIG	1545	sp|Q8HZK2|DUOX2_PIG	1545	1	1545	1	1545	0	1545	1
sp|Q9ES45|DUOX2_RAT	1517	sp|Q9ES45|DUOX2_RAT	1517	1	1517	1	1517	0	1517	1
sp|P00534|ERBB_ALV	634	sp|P00533|EGFR_HUMAN	1210	1	632	580	1210	0	634	1
sp|Q13045|FLII_HUMAN	1269	sp|Q13045|FLII_HUMAN	1269	1	1269	1	1269	0	1269	1
sp|Q9UII4|HERC5_HUMAN	1024	sp|Q9UII4|HERC5_HUMAN	1024	1	1024	1	1024	0	1024	1
sp|Q14103|HNRPD_HUMAN	355	sp|Q14103|HNRPD_HUMAN	355	1	355	1	355	0	355	1
sp|Q60668|HNRPD_MOUSE	355	sp|Q60668|HNRPD_MOUSE	355	1	355	1	355	0	355	1
sp|Q9JJ54|HNRPD_RAT	353	sp|Q9JJ54|HNRPD_RAT	353	1	353	1	353	0	353	1
sp|Q08334|I10R2_HUMAN	325	sp|Q08334|I10R2_HUMAN	325	1	325	1	325	0	325	1
sp|P26896|IL2RB_RAT	537	sp|P26896|IL2RB_RAT	537	1	537	1	537	0	537	1
sp|P15260|INGR1_HUMAN	489	sp|P15260|INGR1_HUMAN	489	1	489	1	489	0	489	1
sp|Q8CFA1|IRAK2_MOUSE	622	sp|Q8CFA1|IRAK2_MOUSE	622	1	622	1	622	0	622	1
sp|Q4QQS0|IRAK2_RAT	624	sp|Q4QQS0|IRAK2_RAT	624	1	624	1	624	0	624	1
sp|Q14114|LRP8_HUMAN	963	sp|Q14114|LRP8_HUMAN	963	1	963	1	963	0	963	1
sp|Q14766|LTBP1_HUMAN	1721	sp|Q14766|LTBP1_HUMAN	1721	1	1721	1	1721	0	1721	1
sp|Q8CG19|LTBP1_MOUSE	1712	sp|Q8CG19|LTBP1_MOUSE	1712	1	1712	1	1712	0	1712	1
sp|Q63661|MUC4_RAT	2344	sp|Q63661|MUC4_RAT	2344	1	2344	1	2344	0	2344	1
sp|Q60591|NFAC2_MOUSE	927	sp|Q60591|NFAC2_MOUSE	927	1	927	1	927	0	927	1
sp|Q6F3J0|NFKB1_CANFA	972	sp|Q6F3J0|NFKB1_CANFA	972	1	972	1	972	0	972	1
sp|P29474|NOS3_HUMAN	1203	sp|P29474|NOS3_HUMAN	1203	1	1203	1	1203	0	1203	1
sp|O15504|NUPL2_HUMAN	423	sp|O15504|NUPL2_HUMAN	423	1	423	1	423	0	423	1
sp|P53347|ONCM_MOUSE	263	sp|P53347|ONCM_MOUSE	263	1	263	1	263	0	263	1
sp|P55085|PAR2_HUMAN	397	sp|P55085|PAR2_HUMAN	397	1	397	1	397	0	397	1
sp|P55086|PAR2_MOUSE	399	sp|P55086|PAR2_MOUSE	399	1	399	1	399	0	399	1
sp|O60486|PLXC1_HUMAN	1568	sp|O60486|PLXC1_HUMAN	1568	1	1568	1	1568	0	1568	1
sp|Q63259|PTPRN_RAT	983	sp|Q63259|PTPRN_RAT	983	1	983	1	983	0	983	1
sp|P49792|RBP2_HUMAN	3224	sp|P49792|RBP2_HUMAN	3224	1	3224	1	3224	0	3224	1
sp|Q64729|TGFR1_MOUSE	503	sp|Q64729|TGFR1_MOUSE	503	1	503	1	503	0	503	1
sp|P80204|TGFR1_RAT	501	sp|P80204|TGFR1_RAT	501	1	501	1	501	0	501	1
sp|O15455|TLR3_HUMAN	904	sp|O15455|TLR3_HUMAN	904	1	904	1	904	0	904	1
sp|Q91875|FGF9_XENLA	209	sp|Q91875|FGF9_XENLA	209	1	209	1	209	9e-157	209	1
sp|Q3ZFI5|FGF9_DIDAL	209	sp|Q3ZFI5|FGF9_DIDAL	209	1	209	1	209	3e-155	209	1
sp|Q95L12|FGF9_PIG	208	sp|Q95L12|FGF9_PIG	208	1	208	1	208	1e-154	208	1

## Sheet: summery
query seq	query len	known seq	known len	query start	query end	known start	known end	Evalue	match len	match len/query len
sp|P0DJE2|VM3A_VIPAA 最大值										1.31522
总计最大值										1.31522
sp|P18731|ZG62_XENLA 最大值										1.30769
sp|O55226|CHAD_MOUSE 最大值										1.23743
sp|P16372|ZFP58_MOUSE 最大值										1.19836
sp|O15455|TLR3_HUMAN 最大值										1.18916
sp|Q9HBT8|Z286A_HUMAN 最大值										1.1785
sp|Q27972|CHAD_BOVIN 最大值										1.1662
sp|O15335|CHAD_HUMAN 最大值										1.15877
sp|Q16670|ZN187_HUMAN 最大值										1.14017
sp|A6QNZ0|ZN187_BOVIN 最大值										1.13361
sp|Q62192|CD180_MOUSE 最大值										1.13162
sp|O14326|PUB3_SCHPO 最大值										1.11196
sp|Q8CFA1|IRAK2_MOUSE 最大值										1.10932
sp|Q9ES45|DUOX2_RAT 最大值										1.10415
sp|P51050|MTR1B_CHICK 最大值										1.10035
sp|O32214|CYSJ_BACSU 最大值										1.09587
sp|Q8CG19|LTBP1_MOUSE 最大值										1.09521
sp|O43361|ZN749_HUMAN 最大值										1.09512
sp|A7MJ63|CYSJ_CROS8 最大值										1.095
sp|Q6D1A1|CYSJ_ERWCT 最大值										1.0936
sp|P38039|CYSJ_SALTY 最大值										1.09349
sp|Q4QQS0|IRAK2_RAT 最大值										1.09295
sp|Q95L12|FGF9_PIG 最大值										1.09135
sp|Q8N988|ZN557_HUMAN 最大值										1.08983
sp|Q5PXS1|LCK_AOTNA 最大值										1.08841
sp|Q8HZK2|DUOX2_PIG 最大值										1.08738
sp|Q65T53|CYSJ_MANSM 最大值										1.0871
sp|A8G9X6|CYSJ_SERP5 最大值										1.08681
sp|A6TD49|CYSJ_KLEP7 最大值										1.08514
sp|A9N2E6|CYSJ_SALPB 最大值										1.08514
sp|Q5PEH7|CYSJ_SALPA 最大值										1.08514
sp|A1JJS2|CYSJ_YERE8 最大值										1.08486
sp|Q9MZF4|DUOX1_CANFA 最大值										1.08446
sp|Q9ZSV1|PARP1_MAIZE 最大值										1.08367
sp|A1AEV0|CYSJ_ECOK1 最大值										1.08347
sp|A7ZQK7|CYSJ_ECO24 最大值										1.08347
sp|A8A3P5|CYSJ_ECOHS 最大值										1.08347
sp|A9MF16|CYSJ_SALAR 最大值										1.08347
sp|B1IU77|CYSJ_ECOLC 最大值										1.08347
sp|P38038|CYSJ_ECOLI 最大值										1.08347
sp|Q0T1I8|CYSJ_SHIF8 最大值										1.08347
sp|Q0TEA2|CYSJ_ECOL5 最大值										1.08347
sp|Q1R7T4|CYSJ_ECOUT 最大值										1.08347
sp|Q31XM4|CYSJ_SHIBS 最大值										1.08347
sp|Q32CG3|CYSJ_SHIDS 最大值										1.08347
sp|Q3YY94|CYSJ_SHISS 最大值										1.08347
sp|Q83QD9|CYSJ_SHIFL 最大值										1.08347
sp|Q8FEI7|CYSJ_ECOL6 最大值										1.08347
sp|Q8X7U1|CYSJ_ECO57 最大值										1.08347
sp|Q8Z458|CYSJ_SALTI 最大值										1.08347
sp|Q1LTP1|CYSJ_BAUCH 最大值										1.08235
sp|Q91875|FGF9_XENLA 最大值										1.08134
sp|A8ANX1|CYSJ_CITK8 最大值										1.0782
sp|Q5QD15|TAAR4_MOUSE 最大值										1.07781
sp|Q3ZFI5|FGF9_DIDAL 最大值										1.07656
sp|A4WDW1|CYSJ_ENT38 最大值										1.07488
sp|Q7Z7G1|CLNK_HUMAN 最大值										1.07477
sp|P55865|CAS1A_XENLA 最大值										1.06995
sp|Q14766|LTBP1_HUMAN 最大值										1.06392
sp|P26896|IL2RB_RAT 最大值										1.06145
sp|A8MQ14|ZN850_HUMAN 最大值										1.05963
sp|Q8N7Q3|ZN676_HUMAN 最大值										1.05442
sp|Q8JZQ0|CSF1_RAT 最大值										1.053
sp|P07141|CSF1_MOUSE 最大值										1.04891
sp|Q8DCK2|CYSJ_VIBVU 最大值										1.04708
sp|Q8CIM5|GPR84_MOUSE 最大值										1.04545
sp|Q49SQ3|GPR33_PANTR 最大值										1.04505
sp|Q8VG04|OL478_MOUSE 最大值										1.04459
sp|Q5RE50|ZN215_PONAB 最大值										1.04449
sp|Q8VYU7|PPA4_ARATH 最大值										1.04425
sp|Q9V9J3|SRC42_DROME 最大值										1.04062
sp|P15260|INGR1_HUMAN 最大值										1.03885
sp|Q86H45|ELP2_DICDI 最大值										1.03774
sp|Q49SQ1|GPR33_HUMAN 最大值										1.03604
sp|Q8NGG1|OR8J2_HUMAN 最大值										1.03492
sp|P52347|MCP_HHV7J 最大值										1.0342
sp|Q2FYQ8|OPPF2_STAA8 最大值										1.03004
sp|Q61337|BAD_MOUSE 最大值										1.02941
sp|O35147|BAD_RAT 最大值										1.02927
sp|P61111|THSA_PYRKO 最大值										1.0292
sp|P61112|THSA_THEK1 最大值										1.0292
sp|P05120|PAI2_HUMAN 最大值										1.02651
sp|Q04998|INHBA_MOUSE 最大值										1.02594
sp|Q8NGK0|O51G2_HUMAN 最大值										1.02229
sp|P05154|IPSP_HUMAN 最大值										1.02217
sp|P12581|HEMA_I49A0 最大值										1.02139
sp|Q6X2S4|INHBA_FELCA 最大值										1.02123
sp|P07995|INHBA_BOVIN 最大值										1.02118
sp|P43032|INHBA_SHEEP 最大值										1.02118
sp|P08476|INHBA_HUMAN 最大值										1.02113
sp|P12439|HEMA_I84A3 最大值										1.01961
sp|A3KNA5|FIL1L_DANRE 最大值										1.01949
sp|Q06085|TYDC1_PETCR 最大值										1.01852
sp|Q9IBD8|PTPRC_CYPCA 最大值										1.01809
sp|P07093|GDN_HUMAN 最大值										1.01759
sp|Q95125|TA2R_BOVIN 最大值										1.01749
sp|Q9EA42|NRAM_I77A4 最大值										1.01706
sp|P81559|ESR1_XENLA 最大值										1.01536
sp|P42935|ELP2_YEAST 最大值										1.01523
sp|Q8VI40|TRI60_MOUSE 最大值										1.01288
sp|Q2RCH3|NRAM_I80A4 最大值										1.01279
sp|Q6F3J0|NFKB1_CANFA 最大值										1.01132
sp|P03475|NRAM_I72A3 最大值										1.01066
sp|P03483|NRAM_I72A2 最大值										1.01066
sp|Q09106|NRAM_I78AB 最大值										1.01066
sp|Q1PUD6|NRAM_I73A5 最大值										1.01066
sp|Q2ICQ7|NRAM_I72A4 最大值										1.01066
sp|Q2RFA3|NRAM_I76A6 最大值										1.01066
sp|Q30NP8|NRAM_I75A0 最大值										1.01066
sp|Q92091|NOS2_ONCMY 最大值										1.01064
sp|Q60750|EPHA1_MOUSE 最大值										1.01024
sp|Q64562|CP21A_RAT 最大值										1.01014
sp|Q03142|FGFR4_MOUSE 最大值										1.01001
sp|P80204|TGFR1_RAT 最大值										1.00998
sp|Q64729|TGFR1_MOUSE 最大值										1.00994
sp|A8MXY4|ZNF99_HUMAN 最大值										1.00965
sp|P21709|EPHA1_HUMAN 最大值										1.00922
sp|O12990|JAK1_DANRE 最大值										1.00867
sp|Q6XTN2|NRAM_I69A0 最大值										1.00853
sp|P50282|MMP9_RAT 最大值										1.00847
sp|P70708|PADI3_RAT 最大值										1.00753
sp|Q9ULW8|PADI3_HUMAN 最大值										1.00753
sp|Q9Z184|PADI3_MOUSE 最大值										1.00753
sp|Q60673|PTPRN_MOUSE 最大值										1.00715
sp|A0RUM4|EF1A_CENSY 最大值										1.00688
sp|P0C0K6|EPHB6_PANTR 最大值										1.00686
sp|Q9JJ54|HNRPD_RAT 最大值										1.00567
sp|Q60XS3|GPA16_CAEBR 最大值										1.00565
sp|P40226|TPO_MOUSE 最大值										1.00562
sp|P48820|RBP2_BOVIN 最大值										1.00461
sp|Q9Y2J8|PADI2_HUMAN 最大值										1.00451
sp|Q02C42|ALLB_SOLUE 最大值										1.00438
sp|Q60591|NFAC2_MOUSE 最大值										1.00431
sp|Q69153|UL70_MUHVS 最大值										1.00311
sp|Q01014|HELI_SHV21 最大值										1.00256
sp|P41245|MMP9_MOUSE 最大值										1.00137
sp|Q8R0G9|NU133_MOUSE 最大值										1.00087
sp|Q9QZC2|PLXC1_MOUSE 最大值										1.00064
sp|O15504|NUPL2_HUMAN 最大值										1
sp|O60486|PLXC1_HUMAN 最大值										1
sp|P00534|ERBB_ALV 最大值										1
sp|P10809|CH60_HUMAN 最大值										1
sp|P22411|DPP4_PIG 最大值										1
sp|P29474|NOS3_HUMAN 最大值										1
sp|P31081|CH60_BOVIN 最大值										1
sp|P49792|RBP2_HUMAN 最大值										1
sp|P53347|ONCM_MOUSE 最大值										1
sp|P55085|PAR2_HUMAN 最大值										1
sp|P55086|PAR2_MOUSE 最大值										1
sp|Q08334|I10R2_HUMAN 最大值										1
sp|Q13045|FLII_HUMAN 最大值										1
sp|Q14103|HNRPD_HUMAN 最大值										1
sp|Q14114|LRP8_HUMAN 最大值										1
sp|Q2HR64|DEN_HHV8P 最大值										1
sp|Q60668|HNRPD_MOUSE 最大值										1
sp|Q63259|PTPRN_RAT 最大值										1
sp|Q63661|MUC4_RAT 最大值										1
sp|Q9JJ28|FLII_MOUSE 最大值										1
sp|Q9UII4|HERC5_HUMAN 最大值										1
sp|Q9V769|C6A22_DROME 最大值										0.997996
sp|P00535|ERBB_AVIER 最大值										0.996689
sp|A1KPA8|CH602_MYCBP 最大值										0.990724
sp|P0A518|CH601_MYCTU 最大值										0.990724
sp|Q3Z6L3|CH60_DEHE1 最大值										0.990689
sp|O74261|HSP60_CANAL 最大值										0.989399
sp|Q96SE7|ZN347_HUMAN 最大值										0.988081
sp|A2C6Z6|CH601_PROM3 最大值										0.987132
sp|A3PVQ7|CH602_MYCSJ 最大值										0.987037
sp|B2TIX0|CH60_CLOBB 最大值										0.987037
sp|Q1BCW7|CH602_MYCSS 最大值										0.987037
sp|Q6MBZ5|CH602_PARUW 最大值										0.987037
sp|Q03MK3|CH60_STRTD 最大值										0.987013
sp|Q2RL13|CH601_MOOTA 最大值										0.987013
sp|Q5M1M9|CH60_STRT1 最大值										0.987013
sp|A0QSS4|CH602_MYCS2 最大值										0.985185
sp|A4QBU0|CH601_CORGB 最大值										0.98513
sp|Q8NSS0|CH601_CORGL 最大值										0.98513
sp|P27153|RDRP_DHVI1 最大值										0.984637
sp|A5GNA9|CH602_SYNPW 最大值										0.983456
sp|Q3AHM4|CH602_SYNSC 最大值										0.983456
sp|Q7TUS4|CH602_PROMM 最大值										0.983456
sp|A4TEN6|CH602_MYCGI 最大值										0.983364
sp|A5I723|CH60_CLOBH 最大值										0.983364
sp|C1FLV5|CH60_CLOBJ 最大值										0.983364
sp|C3KUC8|CH60_CLOB6 最大值										0.983364
sp|O16805|CP4D1_DROSI 最大值										0.982422
sp|A7GZ43|CH60_CAMC5 最大值										0.981618
sp|Q0I7U3|CH602_SYNS3 最大值										0.981584
sp|Q46J70|CH601_PROMT 最大值										0.981584
sp|A4JPD1|CH602_BURVG 最大值										0.981481
sp|Q3AZK3|CH601_SYNS9 最大值										0.979779
sp|Q7TTX1|CH601_SYNPX 最大值										0.979779
sp|Q7TU44|CH602_PROMP 最大值										0.979779
sp|A0Q2T1|CH60_CLONN 最大值										0.979742
sp|P08823|RUBA_WHEAT 最大值										0.979742
sp|Q891G4|CH60_CLOTE 最大值										0.979742
sp|Q8KJ24|CH60_CLOBO 最大值										0.979742
sp|B3DPK4|CH60_BIFLD 最大值										0.979667
sp|Q8G879|CH60_BIFLO 最大值										0.979667
sp|A0KCS0|CH603_BURCH 最大值										0.97963
sp|Q1BV70|CH602_BURCA 最大值										0.97963
sp|Q8GSQ1|C85A1_ORYSJ 最大值										0.978678
sp|A5GV53|CH60_SYNR3 最大值										0.978062
sp|A2BT10|CH602_PROMS 最大值										0.977982
sp|B3PLM6|CH60_CELJU 最大值										0.977982
sp|Q318V6|CH602_PROM9 最大值										0.977982
sp|A6LQ87|CH60_CLOB8 最大值										0.977819
sp|Q6NJ37|CH601_CORDI 最大值										0.977737
sp|O72540|DPOL_ADEB3 最大值										0.977517
sp|O14073|YEA8_SCHPO 最大值										0.977301
sp|A4VP82|CH60_PSEU5 最大值										0.97619
sp|A0RNU3|CH60_CAMFF 最大值										0.976147
sp|O69289|CH60_CAMJE 最大值										0.976147
sp|Q5HTP2|CH60_CAMJR 最大值										0.976147
sp|Q8KF02|CH60_CHLTE 最大值										0.976147
sp|O65785|C71B3_ARATH 最大值										0.976048
sp|B0BNA7|EIF3I_RAT 最大值										0.975385
sp|B5FZ19|EIF3I_TAEGU 最大值										0.975385
sp|Q5E966|EIF3I_BOVIN 最大值										0.975385
sp|Q60528|MUC1_MESAU 最大值										0.974852
sp|Q8Y1P8|CH60_RALSO 最大值										0.974406
sp|Q9XAU7|CH60_PSEHT 最大值										0.974406
sp|B9KCR7|CH60_CAMLR 最大值										0.974312
sp|O68309|CH60_AERSA 最大值										0.974265
sp|P04258|CO3A1_BOVIN 最大值										0.974261
sp|B0CEZ1|CH602_ACAM1 最大值										0.974217
sp|Q4JTF2|CH602_CORJK 最大值										0.974122
sp|Q924X6|LRP8_MOUSE 最大值										0.973896
sp|Q5ZL72|CH60_CHICK 最大值										0.973822
sp|A4SDP9|CH60_PROVI 最大值										0.972578
sp|Q3AR09|CH60_CHLCH 最大值										0.972578
sp|Q3SMK1|CH60_THIDA 最大值										0.972578
sp|A1TKQ5|CH60_ACIAC 最大值										0.972477
sp|P0C193|CH60_SODGL 最大值										0.972477
sp|P35469|CH601_RHIME 最大值										0.972477
sp|Q60AY0|CH601_METCA 最大值										0.972477
sp|Q92ZQ4|CH604_RHIME 最大值										0.972477
sp|A0KGL1|CH60_AERHH 最大值										0.972426
sp|A3M836|CH60_ACIBT 最大值										0.972426
sp|A4SR80|CH60_AERS4 最大值										0.972426
sp|A5F4Y1|CH602_VIBC3 最大值										0.972426
sp|B0VDR6|CH60_ACIBY 最大值										0.972426
sp|B7I618|CH60_ACIB5 最大值										0.972426
sp|Q2JL43|CH601_SYNJB 最大值										0.972426
sp|Q2JUN7|CH602_SYNJA 最大值										0.972426
sp|B0TX65|CH60_FRAP2 最大值										0.972376
sp|Q5RB98|NUPL2_PONAB 最大值										0.971631
sp|Q5U526|I4A3A_XENLA 最大值										0.971084
sp|A4XYM0|CH60_PSEMY 最大值										0.970803
sp|A1VCQ0|CH60_DESVV 最大值										0.97075
sp|A5EX17|CH60_DICNV 最大值										0.97075
sp|A8H8W3|CH60_SHEPA 最大值										0.97075
sp|B0TVL3|CH60_SHEHH 最大值										0.97075
sp|B0USK6|CH60_HAES2 最大值										0.97075
sp|Q0I284|CH60_HAES1 最大值										0.97075
sp|Q65VE4|CH60_MANSM 最大值										0.97075
sp|Q72AL6|CH60_DESVH 最大值										0.97075
sp|B1J3K5|CH60_PSEPW 最大值										0.970696
sp|B9MDC5|CH60_ACIET 最大值										0.970696
sp|Q1LSP5|CH60_BAUCH 最大值										0.970696
sp|Q39ZP5|CH60_GEOMG 最大值										0.970696
sp|B5F2L0|CH60_SALA4 最大值										0.970642
sp|C4LCA2|CH60_TOLAT 最大值										0.970642
sp|A1AWK7|CH60_RUTMC 最大值										0.970588
sp|Q9LW27|C71BF_ARATH 最大值										0.969388
sp|B8DJC4|CH60_DESVM 最大值										0.968978
sp|P43733|CH60_HAEIN 最大值										0.968978
sp|A7MMC0|CH60_CROS8 最大值										0.968921
sp|B1XRX1|CH60_POLNS 最大值										0.968921
sp|C5BDK5|CH60_EDWI9 最大值										0.968921
sp|P31294|CH60_HAEDU 最大值										0.968921
sp|Q2IFK0|CH602_ANADE 最大值										0.968921
sp|Q59687|CH60_PASMU 最大值										0.968921
sp|Q7U348|CH60_BLOFL 最大值										0.968921
sp|A5W8M6|CH60_PSEP1 最大值										0.968864
sp|P31293|CH60_CHRVI 最大值										0.968864
sp|Q1I5E2|CH60_PSEE4 最大值										0.968864
sp|Q7M7I7|CH601_VIBVY 最大值										0.968864
sp|Q88N55|CH60_PSEPK 最大值										0.968864
sp|Q9ALA9|CH601_VIBVU 最大值										0.968864
sp|P48216|CH60_PSEPU 最大值										0.968807
sp|Q07WX7|CH60_SHEFN 最大值										0.968807
sp|Q12S61|CH60_SHEDO 最大值										0.968807
sp|Q2LTG7|CH602_SYNAS 最大值										0.968807
sp|Q64754|CAP3_ADEG1 最大值										0.968696
sp|P80668|FEAB_ECOLI 最大值										0.967936
sp|A1JIP3|CH60_YERE8 最大值										0.967273
sp|A1U292|CH60_MARAV 最大值										0.967273
sp|P0CP66|CPK1_CRYNJ 最大值										0.967213
sp|P0CP67|CPK1_CRYNB 最大值										0.967213
sp|Q2SDG0|CH60_HAHCH 最大值										0.967213
sp|A6T1E5|CH60_JANMA 最大值										0.967153
sp|A7FN01|CH60_YERP3 最大值										0.967153
sp|A9QYQ1|CH60_YERPG 最大值										0.967153
sp|B1JMR1|CH60_YERPY 最大值										0.967153
sp|B2K1Y4|CH60_YERPB 最大值										0.967153
sp|B8D6T6|CH60_BUCAT 最大值										0.967153
sp|B8D8I2|CH60_BUCA5 最大值										0.967153
sp|Q66FD5|CH60_YERPS 最大值										0.967153
sp|Q7MAZ7|CH60_PHOLL 最大值										0.967153
sp|Q8KIX4|CH60_BUCPP 最大值										0.967153
sp|Q8ZIY3|CH60_YERPE 最大值										0.967153
sp|Q93N34|CH60_BUCRP 最大值										0.967153
sp|Q93N35|CH60_BUCRM 最大值										0.967153
sp|B5E9Y2|CH60_GEOBB 最大值										0.967093
sp|C6DY43|CH60_GEOSM 最大值										0.967093
sp|O66026|CH60_KLEPN 最大值										0.967093
sp|A0L170|CH60_SHESA 最大值										0.966972
sp|A1RNN6|CH60_SHESW 最大值										0.966972
sp|A1SAC0|CH60_SHEAM 最大值										0.966972
sp|A3D8W9|CH60_SHEB5 最大值										0.966972
sp|A4Y398|CH60_SHEPC 最大值										0.966972
sp|A6WJ17|CH60_SHEB8 最大值										0.966972
sp|Q0HEQ4|CH60_SHESM 最大值										0.966972
sp|Q0HZ97|CH60_SHESR 最大值										0.966972
sp|Q8CX48|CH60_SHEON 最大值										0.966972
sp|Q6FZK1|PUR5_BARQU 最大值										0.966759
sp|Q6LM06|CH60_PHOPR 最大值										0.965455
sp|A1K436|CH601_AZOSB 最大值										0.965392
sp|A1AJ51|CH601_ECOK1 最大值										0.965328
sp|A7ZV12|CH60_ECO24 最大值										0.965328
sp|A8A7N9|CH60_ECOHS 最大值										0.965328
sp|A9MFR9|CH60_SALAR 最大值										0.965328
sp|A9N3Z7|CH60_SALPB 最大值										0.965328
sp|B1ITQ5|CH60_ECOLC 最大值										0.965328
sp|B1LQG4|CH60_ECOSM 最大值										0.965328
sp|B1XDP7|CH60_ECODH 最大值										0.965328
sp|B2TY18|CH60_SHIB3 最大值										0.965328
sp|B4TF80|CH60_SALHS 最大值										0.965328
sp|B4TSC6|CH60_SALSV 最大值										0.965328
sp|B5BKF4|CH60_SALPK 最大值										0.965328
sp|B5FRK2|CH60_SALDC 最大值										0.965328
sp|B5R005|CH60_SALEP 最大值										0.965328
sp|B5R991|CH60_SALG2 最大值										0.965328
sp|B5Z2F2|CH60_ECO5E 最大值										0.965328
sp|B6I615|CH60_ECOSE 最大值										0.965328
sp|B7LC02|CH60_ECO55 最大值										0.965328
sp|B7LLS5|CH60_ESCF3 最大值										0.965328
sp|B7M8Q4|CH60_ECO8A 最大值										0.965328
sp|B7MKU8|CH60_ECO45 最大值										0.965328
sp|B7MSV9|CH60_ECO81 最大值										0.965328
sp|B7NG81|CH60_ECOLU 最大值										0.965328
sp|B7NTK2|CH60_ECO7I 最大值										0.965328
sp|B7UPW3|CH60_ECO27 最大值										0.965328
sp|C0Q6A2|CH60_SALPC 最大值										0.965328
sp|C5A1D5|CH60_ECOBW 最大值										0.965328
sp|P0A1D3|CH60_SALTY 最大值										0.965328
sp|P0A1D4|CH60_SALTI 最大值										0.965328
sp|P0A6F5|CH60_ECOLI 最大值										0.965328
sp|P0A6F6|CH60_ECOL6 最大值										0.965328
sp|P0A6F7|CH60_ECO57 最大值										0.965328
sp|P0A6F8|CH60_SHIFL 最大值										0.965328
sp|P95800|CH60_STEMA 最大值										0.965328
sp|Q0SXD6|CH60_SHIF8 最大值										0.965328
sp|Q0T9P8|CH60_ECOL5 最大值										0.965328
sp|Q1R3B6|CH60_ECOUT 最大值										0.965328
sp|Q2IKI2|CH601_ANADE 最大值										0.965328
sp|Q31T78|CH60_SHIBS 最大值										0.965328
sp|Q328C4|CH60_SHIDS 最大值										0.965328
sp|Q3YUJ7|CH60_SHISS 最大值										0.965328
sp|Q57GP7|CH60_SALCH 最大值										0.965328
sp|Q5PL62|CH60_SALPA 最大值										0.965328
sp|A5CWP6|CH60_VESOH 最大值										0.965265
sp|B0KFQ2|CH60_PSEPG 最大值										0.965265
sp|Q7M2U8|APOE_SHEEP 最大值										0.96519
sp|A0Q838|CH60_FRATN 最大值										0.965074
sp|A7NE88|CH60_FRATF 最大值										0.965074
sp|P94798|CH60_FRATH 最大值										0.965074
sp|Q0BKF7|CH60_FRATO 最大值										0.965074
sp|Q14FU4|CH60_FRAT1 最大值										0.965074
sp|Q5NEE1|CH60_FRATT 最大值										0.965074
sp|P56669|HLG3_MAIZE 最大值										0.964706
sp|A0L4C9|CH60_MAGSM 最大值										0.963702
sp|A4SZV4|CH60_POLSQ 最大值										0.963636
sp|Q47IZ8|CH60_DECAR 最大值										0.963636
sp|Q5P7G2|CH60_AROAE 最大值										0.963636
sp|A1VJZ8|CH602_POLNA 最大值										0.96357
sp|Q487Q9|CH60_COLP3 最大值										0.963504
sp|A4W5N8|CH60_ENT38 最大值										0.963437
sp|Q1D3Y5|CH601_MYXXD 最大值										0.963437
sp|Q8KIX2|CH60_BUCTS 最大值										0.961818
sp|A6TH53|CH60_KLEP7 最大值										0.961679
sp|A8AMQ6|CH60_CITK8 最大值										0.961679
sp|B5Y368|CH60_KLEP3 最大值										0.961679
sp|O66198|CH60_ENTAK 最大值										0.961679
sp|Q8VYZ2|PPA8_ARATH 最大值										0.961194
sp|Q8K4T4|FLIP1_RAT 最大值										0.960396
sp|B1KIR6|CH60_SHEWM 最大值										0.96
sp|B8CID3|CH60_SHEPW 最大值										0.96
sp|A6VB57|CH60_PSEA7 最大值										0.959781
sp|B7UZG3|CH60_PSEA8 最大值										0.959781
sp|P30718|CH60_PSEAE 最大值										0.959781
sp|Q02H55|CH60_PSEAB 最大值										0.959781
sp|A9AD19|ASTD_BURM1 最大值										0.958932
sp|P31042|CD28_RAT 最大值										0.958716
sp|Q21ZD1|CH601_RHOFD 最大值										0.958333
sp|Q2Y6I6|CH60_NITMU 最大值										0.958333
sp|O82059|G6PI_SPIOL 最大值										0.957597
sp|Q9CS72|FLIP1_MOUSE 最大值										0.95706
sp|Q39I25|ASTD_BURS3 最大值										0.956879
sp|P18892|BT1A1_BOVIN 最大值										0.956274
sp|Q13410|BT1A1_HUMAN 最大值										0.956274
sp|Q26240|NOS_RHOPR 最大值										0.955707
sp|Q8IVV2|LOXH1_HUMAN 最大值										0.954802
sp|P38082|NRG2_YEAST 最大值										0.954545
sp|Q66613|GB_EHV2 最大值										0.953089
sp|Q9JIL8|RAD50_RAT 最大值										0.952744
sp|O64718|C71B9_ARATH 最大值										0.952
sp|Q885J7|ASTD_PSESM 最大值										0.95082
sp|P29333|G6PI2_CLALE 最大值										0.950791
sp|P11714|CP2D9_MOUSE 最大值										0.950397
sp|D2A0H5|SNMP1_TRICA 最大值										0.947471
sp|O04164|C71A6_NEPRA 最大值										0.945205
sp|Q07DZ8|WNT2_ORNAN 最大值										0.944598
sp|P80203|ACVL1_RAT 最大值										0.944444
sp|Q5A895|HSE1_CANAL 最大值										0.943775
sp|Q0GBZ5|OX1R_BOVIN 最大值										0.943529
sp|Q9C029|TRIM7_HUMAN 最大值										0.941292
sp|B9KJ98|CH60_ANAMF 最大值										0.939891
sp|Q92630|DYRK2_HUMAN 最大值										0.938436
sp|P42382|CH60_EHRCH 最大值										0.938182
sp|Q9LJE4|CPNB2_ARATH 最大值										0.937919
sp|P21240|CPNB1_ARATH 最大值										0.935
sp|Q73I71|CH60_WOLPM 最大值										0.92714
sp|Q07407|FGFR1_DROME 最大值										0.925926
sp|Q3ZCT8|KBTBC_HUMAN 最大值										0.924559
sp|Q96514|C71B7_ARATH 最大值										0.922619
sp|Q9LTM2|C71BL_ARATH 最大值										0.921844
sp|Q869V1|NRAM1_DICDI 最大值										0.921201
sp|P08682|CP2E1_RABIT 最大值										0.920892
sp|B4IKJ4|SNMP1_DROSE 最大值										0.920145
sp|P51581|CP2E1_MESAU 最大值										0.916836
sp|P05181|CP2E1_HUMAN 最大值										0.914807
sp|Q8WML4|MUC1_BOVIN 最大值										0.913793
sp|P42208|SEPT2_MOUSE 最大值										0.911357
sp|Q5QXD0|HMUV_IDILO 最大值										0.910853
sp|Q5EA62|FBLN5_BOVIN 最大值										0.910714
sp|C4LB49|RHLB_TOLAT 最大值										0.905882
sp|Q13275|SEM3F_HUMAN 最大值										0.904459
sp|Q7Z7B0|FLIP1_HUMAN 最大值										0.901072
sp|F5HBR4|PORTL_HCMVM 最大值										0.901004
sp|P16735|PORTL_HCMVA 最大值										0.901004
sp|O42430|CP1A1_LIMLI 最大值										0.900192
sp|Q84P26|4CLL8_ARATH 最大值										0.898182
sp|A2Y007|KNOSA_ORYSI 最大值										0.897106
sp|Q7GDL5|KNOSA_ORYSJ 最大值										0.897106
sp|A9S6X4|DRE21_PHYPA 最大值										0.895349
sp|B4NK88|SNMP1_DROWI 最大值										0.893657
sp|B2T672|ADE_BURPP 最大值										0.891429
sp|O42231|CP1A1_LIZAU 最大值										0.890595
sp|B6EPA4|RHLB_ALISL 最大值										0.887097
sp|P50643|RIR1_SUHVK 最大值										0.88503
sp|A8GZJ0|RHLB_SHEPA 最大值										0.880734
sp|Q5RC26|FBLN5_PONAB 最大值										0.879464
sp|Q9UBX5|FBLN5_HUMAN 最大值										0.879464
sp|B7VME9|RHLB_VIBSL 最大值										0.876147
sp|O48958|C71E1_SORBI 最大值										0.875706
sp|Q43054|TCMO_POPKI 最大值										0.869307
sp|Q12S35|RHLB_SHEDO 最大值										0.868056
sp|Q5R760|TRI16_PONAB 最大值										0.861702
sp|Q04468|TCMO_HELTU 最大值										0.859406
sp|Q5QN13|NRAM4_ORYSJ 最大值										0.858182
sp|Q9NSD7|RL3R1_HUMAN 最大值										0.852878
sp|O60391|NMD3B_HUMAN 最大值										0.85139
sp|Q914J2|Y038_SIFVH 最大值										0.851351
sp|Q8K4K4|TRIB1_MOUSE 最大值										0.846774
sp|Q9WV34|MPP2_MOUSE 最大值										0.846014
sp|O14757|CHK1_HUMAN 最大值										0.842437
sp|P97717|ADA1B_MOUSE 最大值										0.836576
sp|O97512|NK3R_RABIT 最大值										0.835118
sp|P09955|CBPB1_PIG 最大值										0.824519
sp|Q8SQ23|TPA_PIG 最大值										0.823843
sp|P16177|NK3R_RAT 最大值										0.823009
sp|Q77K03|NCAP_NDVB1 最大值										0.822086
sp|Q8VDA6|AVPI1_RAT 最大值										0.821918
sp|Q2VWP7|PRTG_HUMAN 最大值										0.82087
sp|Q24SG7|MAMA_DESHY 最大值										0.816176
sp|Q91573|MCR_XENLA 最大值										0.813725
sp|Q8NFT8|DNER_HUMAN 最大值										0.812754
sp|O53510|PKNL_MYCTU 最大值										0.81203
sp|P30432|FUR2_DROME 最大值										0.810602
sp|P00544|FGR_FSVGR 最大值										0.809174
sp|Q22710|NAS26_CAEEL 最大值										0.806763
sp|Q00900|ZEP2_RAT 最大值										0.80673
sp|Q6FIL3|HAS1_CANGA 最大值										0.797571
sp|Q99FY3|NCAP_NDVAF 最大值										0.797546
sp|P39845|PPSA_BACSU 最大值										0.795392
sp|P35329|CD22_MOUSE 最大值										0.794664
sp|P09459|NCAP_NDVB 最大值										0.793456
sp|Q4WF61|NRPS3_ASPFU 最大值										0.781413
sp|Q9LV45|FB184_ARATH 最大值										0.780423
sp|Q8BX57|PXK_MOUSE 最大值										0.768041
sp|Q8R242|DIAC_MOUSE 最大值										0.76776
sp|P23944|ADA1D_RAT 最大值										0.766488
sp|Q50EK3|C04C1_PINTA 最大值										0.760618
sp|P06337|IGHM_MESAU 最大值										0.755507
sp|Q03247|APOE_BOVIN 最大值										0.753165
sp|Q9V7G5|C4AA1_DROME 最大值										0.752941
sp|Q7TQM3|FGRL1_RAT 最大值										0.752363
sp|Q18905|CGP1_CAEEL 最大值										0.752039
sp|P42264|GRIK3_RAT 最大值										0.751904
sp|A6ZXG9|DHH1_YEAS7 最大值										0.749012
sp|P39517|DHH1_YEAST 最大值										0.749012
sp|Q6FQU5|DHH1_CANGA 最大值										0.747535
sp|A2QY39|DHH1_ASPNC 最大值										0.746535
sp|P96614|CSHA_BACSU 最大值										0.744939
sp|Q0CBE1|DHH1_ASPTN 最大值										0.740668
sp|Q6UDH6|AN_PSHV1 最大值										0.740385
sp|Q9TTM9|ADA1D_PIG 最大值										0.737303
sp|Q54PX0|Y4251_DICDI 最大值										0.735887
sp|Q8NGQ5|OR9Q1_HUMAN 最大值										0.735484
sp|P10611|CP4A4_RABIT 最大值										0.733333
sp|Q9HCE7|SMUF1_HUMAN 最大值										0.733157
sp|P25100|ADA1D_HUMAN 最大值										0.730769
sp|Q8VEW5|OL493_MOUSE 最大值										0.729299
sp|Q8NGP6|OR5M8_HUMAN 最大值										0.726688
sp|Q84M93|MPK17_ARATH 最大值										0.722222
sp|Q9V558|CP4P1_DROME 最大值										0.721248
sp|O02305|NH217_CAEEL 最大值										0.720627
sp|Q62799|ERBB3_RAT 最大值										0.7177
sp|O54839|EOMES_MOUSE 最大值										0.7157
sp|P39846|PPSB_BACSU 最大值										0.712891
sp|Q17771|NHR35_CAEEL 最大值										0.712177
sp|Q9PUN2|SMUF1_XENLA 最大值										0.711354
sp|P02810|PRPC_HUMAN 最大值										0.710843
sp|Q8VG03|OL482_MOUSE 最大值										0.708978
sp|Q21252|NAS3_CAEEL 最大值										0.708904
sp|Q7F1X5|4CLL5_ORYSJ 最大值										0.708487
sp|Q8NGE0|O10AD_HUMAN 最大值										0.706625
sp|Q54XL6|FRAY1_DICDI 最大值										0.702091
sp|Q9CUN6|SMUF1_MOUSE 最大值										0.701778
sp|Q9LCI7|NQRF_SHEPU 最大值										0.700997
sp|Q9Y462|ZN711_HUMAN 最大值										0.700394
sp|A8W649|AQP5_PIG 最大值										0.698113
sp|P47864|AQP5_RAT 最大值										0.698113
sp|Q1HVH3|BMRF2_EBVA8 最大值										0.691877
sp|Q3KSU2|BMRF2_EBVG 最大值										0.691877
sp|O77469|FBLN1_CAEEL 最大值										0.690934
sp|P22714|GAL7_SALTY 最大值										0.683908
sp|A1YFC1|PEG3_GORGO 最大值										0.683449
sp|P41219|PERI_HUMAN 最大值										0.682979
sp|Q9HD43|PTPRH_HUMAN 最大值										0.681614
sp|Q13112|CAF1B_HUMAN 最大值										0.679785
sp|Q9ULD5|ZN777_HUMAN 最大值										0.678947
sp|Q00537|CDK17_HUMAN 最大值										0.678776
sp|A1YGK6|PEG3_PANPA 最大值										0.676952
sp|G5EBF1|SAX3_CAEEL 最大值										0.67557
sp|B1H234|FLRT3_RAT 最大值										0.668721
sp|Q56X76|RH39_ARATH 最大值										0.660225
sp|P02538|K2C6A_HUMAN 最大值										0.659574
sp|O73673|GCR_PAROL 最大值										0.655514
sp|P53682|CDPK1_ORYSJ 最大值										0.655431
sp|Q8VIM9|IRGQ_MOUSE 最大值										0.651801
sp|A5PK27|R144B_BOVIN 最大值										0.651316
sp|Q8VED5|K2C79_MOUSE 最大值										0.645951
sp|Q7Z7A4|PXK_HUMAN 最大值										0.645329
sp|P46049|HESA1_ANAVT 最大值										0.640449
sp|Q8IRY7|CASP8_DROME 最大值										0.639676
sp|P18500|HESA_NOSS1 最大值										0.638889
sp|Q08905|FRE3_YEAST 最大值										0.637131
sp|Q7M4I5|PA2_APIDO 最大值										0.634328
sp|Q9GN62|PAR4_CAEEL 最大值										0.633712
sp|Q44929|GTCR_ANEMI 最大值										0.632231
sp|Q67C40|MPK7_ORYSJ 最大值										0.630931
sp|P33825|M1_VAR67 最大值										0.630045
sp|P56671|MAZ_MOUSE 最大值										0.628931
sp|A1JJC1|CCME_YERE8 最大值										0.628049
sp|Q5UPX3|COLL3_MIMIV 最大值										0.625133
sp|P85154|CO1A2_MAMAE 最大值										0.625
sp|P20700|LMNB1_HUMAN 最大值										0.62116
sp|B7LJZ2|6PGL_ESCF3 最大值										0.619335
sp|P91210|SRD25_CAEEL 最大值										0.616352
sp|Q96NY8|PVRL4_HUMAN 最大值										0.615686
sp|B7J0W8|Y029_BORBZ 最大值										0.615385
sp|O51060|Y029_BORBU 最大值										0.615385
sp|Q8N1N4|K2C78_HUMAN 最大值										0.615385
sp|P27050|CHID_BACCI 最大值										0.614504
sp|O49318|Y2317_ARATH 最大值										0.612989
sp|Q9LJF3|BRL3_ARATH 最大值										0.611684
sp|Q5XKE5|K2C79_HUMAN 最大值										0.611215
sp|P04259|K2C6B_HUMAN 最大值										0.608156
sp|P48668|K2C6C_HUMAN 最大值										0.608156
sp|P15424|MS116_YEAST 最大值										0.606928
sp|Q1RMS4|LRFN3_BOVIN 最大值										0.605096
sp|Q9BTN0|LRFN3_HUMAN 最大值										0.605096
sp|P55266|DSRAD_RAT 最大值										0.604255
sp|P21402|DPOL_FOWPN 最大值										0.604251
sp|Q99MU3|DSRAD_MOUSE 最大值										0.602716
sp|Q0DV32|4CLL1_ORYSJ 最大值										0.601449
sp|Q148H7|K2C79_BOVIN 最大值										0.6
sp|Q6DGV1|CELF4_DANRE 最大值										0.6
sp|Q58823|Y1428_METJA 最大值										0.599647
sp|Q9NQS3|PVRL3_HUMAN 最大值										0.599271
sp|Q5E9Z9|PVRL4_BOVIN 最大值										0.598039
sp|O30408|TYCB_BREPA 最大值										0.59632
sp|Q9Z331|K2C6B_MOUSE 最大值										0.596085
sp|P18856|CAF1_EPHMU 最大值										0.595978
sp|A6QLN9|VWA1_BOVIN 最大值										0.595642
sp|P29293|ACRO_RAT 最大值										0.594966
sp|Q8BH60|GOPC_MOUSE 最大值										0.593952
sp|P16126|DRTS_LEIAM 最大值										0.592308
sp|P27743|ACVS_NOCLA 最大值										0.590025
sp|Q9SK53|COL3_ARATH 最大值										0.588435
sp|P94459|PPSD_BACSU 最大值										0.587011
sp|Q04747|SRFAB_BACSU 最大值										0.582752
sp|P21910|LAML2_XENLA 最大值										0.582665
sp|P0C5E3|PALLD_RAT 最大值										0.58209
sp|P08709|FA7_HUMAN 最大值										0.581545
sp|Q2F9P2|FA7_PANTR 最大值										0.581545
sp|Q18CB2|DISA_CLOD6 最大值										0.581461
sp|Q7TPD3|ROBO2_MOUSE 最大值										0.579592
sp|Q8BTU7|RCCD1_MOUSE 最大值										0.578249
sp|O13066|RAGP1_XENLA 最大值										0.577586
sp|Q90837|ERG_CHICK 最大值										0.577406
sp|Q9QUJ7|ACSL4_MOUSE 最大值										0.576653
sp|P01872|IGHM_MOUSE 最大值										0.57489
sp|P19787|ACVS1_PENCH 最大值										0.574746
sp|Q9Y8G7|C505_FUSOX 最大值										0.574109
sp|P23293|BUR1_YEAST 最大值										0.57382
sp|O70141|SEM6B_RAT 最大值										0.572717
sp|Q93LL2|ACSA_NOSLI 最大值										0.5727
sp|P54364|JANA_DROPS 最大值										0.57047
sp|P11308|ERG_HUMAN 最大值										0.569959
sp|P81270|ERG_MOUSE 最大值										0.569959
sp|Q66K89|E4F1_HUMAN 最大值										0.568878
sp|P0C8A2|DEFA2_ORNAN 最大值										0.56701
sp|P27742|ACVS_EMENI 最大值										0.564721
sp|Q8CBC6|LRRN3_MOUSE 最大值										0.562942
sp|B1AS29|GRIK3_MOUSE 最大值										0.562568
sp|P53894|CBK1_YEAST 最大值										0.560847
sp|Q7N1Z4|PUR4_PHOLL 最大值										0.559073
sp|P01878|IGHA_MOUSE 最大值										0.55814
sp|Q8BLH5|TSP50_MOUSE 最大值										0.558087
sp|Q1DCA3|GATA_MYXXD 最大值										0.557613
sp|P41157|FLI1_XENLA 最大值										0.556291
sp|Q29RS8|FLI1_BOVIN 最大值										0.55531
sp|Q9UJV3|TRIM1_HUMAN 最大值										0.552381
sp|P70193|LRIG1_MOUSE 最大值										0.549038
sp|Q8NDM7|WDR96_HUMAN 最大值										0.548949
sp|Q9LY50|ACCR3_ARATH 最大值										0.545455
sp|Q88W46|ISPD_LACPL 最大值										0.545064
sp|Q7MN34|XNI_VIBVY 最大值										0.544402
sp|Q811F1|ZBT41_MOUSE 最大值										0.542952
sp|Q9H1R3|MYLK2_HUMAN 最大值										0.541946
sp|O43103|SID2_USTMA 最大值										0.541808
sp|Q9ERZ3|ACM3_MOUSE 最大值										0.541596
sp|Q99102|MUC4_HUMAN 最大值										0.540341
sp|Q9Y5S2|MRCKB_HUMAN 最大值										0.540035
sp|Q3U0V1|FUBP2_MOUSE 最大值										0.53877
sp|P79701|VGFR3_COTCO 最大值										0.538071
sp|B1JJG7|CYSH_YERPY 最大值										0.536885
sp|O13168|TLE1_DANRE 最大值										0.536449
sp|Q7L591|DOK3_HUMAN 最大值										0.534274
sp|A4XHV9|TIG_CALS8 最大值										0.534247
sp|Q8ST87|ABCCA_DICDI 最大值										0.532984
sp|A1JJS4|CYSH_YERE8 最大值										0.532787
sp|Q9FJU2|FBD37_ARATH 最大值										0.532663
sp|O67890|FMT_AQUAE 最大值										0.531353
sp|Q9QZR6|SEPT9_RAT 最大值										0.530142
sp|P26703|V119_ASFL5 最大值										0.529412
sp|A1L1J6|ZN652_RAT 最大值										0.527961
sp|Q9URX8|NG06_SCHPO 最大值										0.527757
sp|P81274|GPSM2_HUMAN 最大值										0.524854
sp|Q9FMA5|C85A1_ARATH 最大值										0.524731
sp|P81694|TXC1_CUPSA 最大值										0.52459
sp|P98095|FBLN2_HUMAN 最大值										0.524493
sp|Q6PCB0|VWA1_HUMAN 最大值										0.523596
sp|Q1KVY1|ATPF_SCEOB 最大值										0.522472
sp|Q9N3X8|SDK_CAEEL 最大值										0.52129
sp|Q9UKP5|ATS6_HUMAN 最大值										0.518353
sp|O15031|PLXB2_HUMAN 最大值										0.516866
sp|P06673|ZEB1_MAIZE 最大值										0.516667
sp|P60987|PIP_CAVPO 最大值										0.513699
sp|Q8BWD2|IP6K3_MOUSE 最大值										0.512626
sp|Q9BMN8|LAR_CAEEL 最大值										0.510909
sp|P35555|FBN1_HUMAN 最大值										0.509927
sp|P26799|SAHH_STRFR 最大值										0.508333
sp|Q8BQR4|KANL2_MOUSE 最大值										0.50823
sp|P0C7J6|LRFN1_RAT 最大值										0.507833
sp|Q9FF58|FBD30_ARATH 最大值										0.507732
sp|Q50LE0|C85A3_SOLLC 最大值										0.507495
sp|Q75FU8|SAHH_LEPIC 最大值										0.506881
sp|Q8EXV1|SAHH_LEPIN 最大值										0.506881
sp|P35556|FBN2_HUMAN 最大值										0.506525
sp|Q6AY70|KANL2_RAT 最大值										0.506148
sp|P41581|6PGD_CITAM 最大值										0.505618
sp|P41582|6PGD_CITDI 最大值										0.505618
sp|P41583|6PGD_CITFR 最大值										0.505618
sp|A1YQ92|ODAM_MACMU 最大值										0.505376
sp|Q9SL02|RAD50_ARATH 最大值										0.505319
sp|Q58EX2|SDK2_HUMAN 最大值										0.504604
sp|Q6P1D5|SE6L1_MOUSE 最大值										0.503634
sp|B1HZM2|FOSB_LYSSC 最大值										0.503546
sp|Q861R7|KANL2_CAPHI 最大值										0.502033
sp|Q9H9L4|KANL2_HUMAN 最大值										0.502033
sp|Q6L5D4|MPK9_ORYSJ 最大值										0.501429
sp|P98133|FBN1_BOVIN 最大值										0.499478
sp|Q61554|FBN1_MOUSE 最大值										0.499478
sp|P52207|6PGD_BACLI 最大值										0.498929
sp|P57737|CORO7_HUMAN 最大值										0.498378
sp|Q9TV36|FBN1_PIG 最大值										0.498084
sp|Q4WLW5|NRP12_ASPFU 最大值										0.497092
sp|Q61555|FBN2_MOUSE 最大值										0.495356
sp|O64477|Y2913_ARATH 最大值										0.493961
sp|Q07QX6|NDVA_RHOP5 最大值										0.493355
sp|Q9Y9F2|AUBA_AERPE 最大值										0.492569
sp|Q28689|MRP2_RABIT 最大值										0.492327
sp|O35464|SEM6A_MOUSE 最大值										0.491756
sp|Q2V354|DF267_ARATH 最大值										0.488636
sp|Q96LB9|PGRP3_HUMAN 最大值										0.486804
sp|A2VCU8|NELL2_XENTR 最大值										0.486486
sp|A1UT20|GATA_BARBK 最大值										0.48583
sp|B1WC68|HDAC8_RAT 最大值										0.482759
sp|Q8VH37|HDAC8_MOUSE 最大值										0.482759
sp|A5FYS4|PROA_ACICJ 最大值										0.480952
sp|Q7NTN6|RBSA_CHRVO 最大值										0.48008
sp|P22743|HBB2_NAJNA 最大值										0.479452
sp|P68052|HBB_PTEBR 最大值										0.479452
sp|A8LJ23|GATA_DINSH 最大值										0.478788
sp|Q75N90|FBN3_HUMAN 最大值										0.478106
sp|Q505F1|NR2C1_MOUSE 最大值										0.477966
sp|Q9VWR2|CP308_DROME 最大值										0.477551
sp|B2RXS4|PLXB2_MOUSE 最大值										0.477199
sp|Q9QZT0|CUZD1_RAT 最大值										0.476112
sp|Q8VDU5|SNRK_MOUSE 最大值										0.475936
sp|P0C064|GRSB_BREBE 最大值										0.47573
sp|P0C063|GRSB_ANEMI 最大值										0.475623
sp|Q9VEZ5|IKKB_DROME 最大值										0.475366
sp|P02093|HBB_ONDZI 最大值										0.472603
sp|P09909|HBB_PHOVI 最大值										0.472603
sp|P28781|HBB_TAPGE 最大值										0.472603
sp|P68046|HBB_ODORO 最大值										0.472603
sp|Q76NV1|DYRK1_DICDI 最大值										0.472488
sp|O70583|TRI18_MOUSE 最大值										0.472059
sp|P13056|NR2C1_HUMAN 最大值										0.46932
sp|Q95K90|NR2C1_MACFA 最大值										0.46932
sp|Q06A28|RRL_MUHVS 最大值										0.467632
sp|Q9VS29|DSCL_DROME 最大值										0.466249
sp|Q9SW11|PUB35_ARATH 最大值										0.465868
sp|P0A1W8|BRNQ_SALTY 最大值										0.464692
sp|P0A1W9|BRNQ_SALTI 最大值										0.464692
sp|P70412|CUZD1_MOUSE 最大值										0.463696
sp|P32019|I5P2_HUMAN 最大值										0.462236
sp|Q12128|BAG7_YEAST 最大值										0.462103
sp|P20768|IGHM_SUNMU 最大值										0.461707
sp|Q18879|CAV2_CAEEL 最大值										0.461538
sp|Q54W86|MYLKF_DICDI 最大值										0.460129
sp|B8IPK9|LPXK_METNO 最大值										0.459941
sp|Q39QC2|FMT_GEOMG 最大值										0.459807
sp|A3GGE9|DBP4_PICST 最大值										0.457516
sp|A3DCM0|TRMFO_CLOTH 最大值										0.456422
sp|Q02315|CP51_ISSOR 最大值										0.451691
sp|P08483|ACM3_RAT 最大值										0.451613
sp|A7TIZ4|ATG1_VANPO 最大值										0.447686
sp|P31629|ZEP2_HUMAN 最大值										0.446034
sp|Q90472|HXDDA_DANRE 最大值										0.445312
sp|Q9LHK4|AB8B_ARATH 最大值										0.444803
sp|A8AY26|HIS5_STRGC 最大值										0.444444
sp|O82376|FBK38_ARATH 最大值										0.444444
sp|Q9N2F0|NGF_GORGO 最大值										0.443983
sp|A7MXZ4|DXR_VIBHB 最大值										0.441397
sp|Q71S21|INVSB_XENLA 最大值										0.441118
sp|P25318|CO8A2_MOUSE 最大值										0.439199
sp|Q49742|Y386_MYCLE 最大值										0.437956
sp|A8AXI2|DAPA_STRGC 最大值										0.437299
sp|P55166|PAX9_CHICK 最大值										0.436578
sp|A8WU31|VRK1_CAEBR 最大值										0.436494
sp|Q5RDG7|MYLK3_PONAB 最大值										0.435897
sp|A7ESL7|DBP10_SCLS1 最大值										0.434783
sp|C5GVC6|VPS10_AJEDR 最大值										0.433333
sp|C5JC96|VPS10_AJEDS 最大值										0.433333
sp|P31034|CBK1_KLULA 最大值										0.433148
sp|A5I669|RL21_CLOBH 最大值										0.432692
sp|A7FXU9|RL21_CLOB1 最大值										0.432692
sp|B1ILY8|RL21_CLOBK 最大值										0.432692
sp|C1FVW8|RL21_CLOBJ 最大值										0.432692
sp|C3L3J6|RL21_CLOB6 最大值										0.432692
sp|Q9UL62|TRPC5_HUMAN 最大值										0.432682
sp|Q91121|GTHB2_MORSA 最大值										0.431655
sp|Q96JM2|ZN462_HUMAN 最大值										0.429769
sp|O24585|CRI4_MAIZE 最大值										0.428413
sp|Q98930|SORL_CHICK 最大值										0.428392
sp|Q04721|NOTC2_HUMAN 最大值										0.427762
sp|Q5U430|UBR3_MOUSE 最大值										0.425622
sp|Q87E79|RL2_XYLFT 最大值										0.425455
sp|Q96P44|COLA1_HUMAN 最大值										0.425287
sp|Q48252|CAGE_HELPY 最大值										0.425229
sp|Q9ZLT4|CAGE_HELPJ 最大值										0.425229
sp|Q5NVK5|PGTA_PONAB 最大值										0.425044
sp|Q92696|PGTA_HUMAN 最大值										0.425044
sp|P01871|IGHM_HUMAN 最大值										0.424779
sp|A8FCG9|MTNX_BACP2 最大值										0.424242
sp|Q12585|CP52T_CANMA 最大值										0.423762
sp|P21441|MDR_LEITA 最大值										0.422481
sp|Q9QW30|NOTC2_RAT 最大值										0.422096
sp|B7UZY8|HIS1_PSEA8 最大值										0.421801
sp|A2QCC7|RM04_ASPNC 最大值										0.421245
sp|O43157|PLXB1_HUMAN 最大值										0.421077
sp|P75856|ELFD_ECOLI 最大值										0.420601
sp|Q8X5E4|ELFD_ECO57 最大值										0.420601
sp|Q4WY82|PPOC_ASPFU 最大值										0.419269
sp|O68006|BACA_BACLI 最大值										0.418649
sp|B4LCX4|CUE_DROVI 最大值										0.418239
sp|Q12852|M3K12_HUMAN 最大值										0.417928
sp|Q8CJH3|PLXB1_MOUSE 最大值										0.414818
sp|B5EUW3|GLGC_VIBFM 最大值										0.414815
sp|O34563|GLNH_BACSU 最大值										0.413919
sp|Q9SYI3|AB5B_ARATH 最大值										0.413821
sp|Q09878|MET10_SCHPO 最大值										0.412525
sp|Q8P8M6|RLUB_XANCP 最大值										0.410569
sp|A2CE44|ZXDAB_MOUSE 最大值										0.41008
sp|P34102|PK3_DICDI 最大值										0.408791
sp|Q7ZUV2|KTNB1_DANRE 最大值										0.407781
sp|Q5R7D1|DDX42_PONAB 最大值										0.407643
sp|P45457|ACEA2_SOYBN 最大值										0.40754
sp|Q9R9J1|MYCA_BACIU 最大值										0.405691
sp|Q60700|M3K12_MOUSE 最大值										0.404279
sp|Q63796|M3K12_RAT 最大值										0.404279
sp|Q7ZXB8|PAB2B_XENLA 最大值										0.40339
sp|P53862|YNW8_YEAST 最大值										0.403101
sp|A6VBC2|HIS1_PSEA7 最大值										0.402844
sp|Q6NVP7|PABP2_XENTR 最大值										0.402027
sp|Q9DDY9|PAB2A_XENLA 最大值										0.402027
sp|A1L3L1|PTR1B_XENLA 最大值										0.401392
sp|C4K5W3|CMOB_HAMD5 最大值										0.401235
sp|Q9LJX0|AB19B_ARATH 最大值										0.400958
sp|Q54W20|ABCD3_DICDI 最大值										0.4
sp|Q505G8|ZN827_MOUSE 最大值										0.399814
sp|Q54EW3|IPO5_DICDI 最大值										0.398313
sp|Q01886|HTS1_COCCA 最大值										0.398237
sp|Q9LMG7|PPA2_ARATH 最大值										0.396341
sp|Q9H195|MUC3B_HUMAN 最大值										0.396226
sp|Q3AU83|RUVC_CHLCH 最大值										0.395833
sp|B8GP39|PUR7_THISH 最大值										0.39527
sp|Q87QX6|GLGC1_VIBPA 最大值										0.395062
sp|Q3UH06|RREB1_MOUSE 最大值										0.394706
sp|P21439|MDR3_HUMAN 最大值										0.394246
sp|Q1KLX4|CAMP_TRAOB 最大值										0.394118
sp|Q55GU0|Y9955_DICDI 最大值										0.393013
sp|O36414|TEGU_ALHV1 最大值										0.392172
sp|B2VKX1|Y1574_ERWT9 最大值										0.392157
sp|A6QPM3|PRDM6_BOVIN 最大值										0.391525
sp|Q11KI3|DER_MESSB 最大值										0.391489
sp|Q1MDD6|DER_RHIL3 最大值										0.391121
sp|B8MG72|VPS10_TALSN 最大值										0.390812
sp|A9MR28|CAID_SALAR 最大值										0.390805
sp|P36583|PCK2_SCHPO 最大值										0.390748
sp|P00645|CEAC_ECOLX 最大值										0.390374
sp|Q9ZMJ9|HCPE_HELPJ 最大值										0.388732
sp|Q9NQX0|PRDM6_HUMAN 最大值										0.388235
sp|Q9Y2D8|ADIP_HUMAN 最大值										0.387622
sp|O94652|GLE1_SCHPO 最大值										0.3875
sp|Q8CCS6|PABP2_MOUSE 最大值										0.387417
sp|P53798|FDFT_MOUSE 最大值										0.387019
sp|B3E6X8|CMOB_GEOLS 最大值										0.386997
sp|P46530|NOTC1_DANRE 最大值										0.386951
sp|Q54QI2|Y9877_DICDI 最大值										0.386823
sp|Q70LM4|LGRD_BREPA 最大值										0.386234
sp|Q4ZPE5|CMOB_PSEU2 最大值										0.38558
sp|Q5VSG8|MANEL_HUMAN 最大值										0.38512
sp|P07688|CATB_BOVIN 最大值										0.385075
sp|C5P311|VPS10_COCP7 最大值										0.384926
sp|Q09499|IRE1_CAEEL 最大值										0.383661
sp|Q6FN53|STE20_CANGA 最大值										0.383607
sp|Q51UJ9|ATG11_MAGO7 最大值										0.382796
sp|P91209|SRD30_CAEEL 最大值										0.382716
sp|Q4V9F0|DGAT2_DANRE 最大值										0.382271
sp|P79365|GTR1_SHEEP 最大值										0.382051
sp|Q9W0T5|PYX_DROME 最大值										0.380753
sp|Q15274|NADC_HUMAN 最大值										0.380471
sp|Q9BRR6|ADPGK_HUMAN 最大值										0.380282
sp|P07207|NOTCH_DROME 最大值										0.379578
sp|Q76N89|HECW1_HUMAN 最大值										0.379203
sp|Q59767|NADB_RHORU 最大值										0.379061
sp|Q865C0|CAH6_CANFA 最大值										0.378125
sp|B3LNF5|VPS10_YEAS1 最大值										0.377299
sp|B5VDW2|VPS10_YEAS6 最大值										0.377299
sp|C7GX93|VPS10_YEAS2 最大值										0.377299
sp|Q08DB0|CEP44_BOVIN 最大值										0.376623
sp|P34283|YKK6_CAEEL 最大值										0.375556
sp|D4D4B1|VPS10_TRIVH 最大值										0.375505
sp|Q641F3|COLA1_XENLA 最大值										0.374086
sp|A1UTQ0|Y1091_BARBK 最大值										0.37377
sp|Q70LM6|LGRB_BREPA 最大值										0.37253
sp|B4H1F5|CUE_DROPE 最大值										0.372488
sp|Q29FE9|CUE_DROPS 最大值										0.372488
sp|Q9S814|EIN2_ARATH 最大值										0.372488
sp|O66129|HEXB_MICLU 最大值										0.372308
sp|Q9JIP0|TRPV5_RAT 最大值										0.372061
sp|P98163|YL_DROME 最大值										0.371472
sp|P70615|LMNB1_RAT 最大值										0.37138
sp|P14733|LMNB1_MOUSE 最大值										0.370748
sp|Q61210|ARHG1_MOUSE 最大值										0.370652
sp|Q9BE72|GTR12_MACFA 最大值										0.37037
sp|P51084|CHS2_TRISU 最大值										0.37018
sp|P51087|CHS5_TRISU 最大值										0.37018
sp|Q9BTK6|PAGR1_HUMAN 最大值										0.370079
sp|P30100|C11B3_RAT 最大值										0.37
sp|P02040|HBB_CEBAL 最大值										0.369863
sp|P67822|HBB_CEBCA 最大值										0.369863
sp|Q604U3|RNH2_METCA 最大值										0.367876
sp|P04015|VE2_HPV11 最大值										0.367847
sp|Q90WN4|FOXD2_XENLA 最大值										0.367052
sp|C9SM62|VPS10_VERA1 最大值										0.365584
sp|Q5JWF2|GNAS1_HUMAN 最大值										0.364513
sp|A8LRQ1|TGT_DINSH 最大值										0.364362
sp|O42282|RDS2_CHICK 最大值										0.362637
sp|Q64658|C11B2_MESAU 最大值										0.362
sp|P57071|PRD15_HUMAN 最大值										0.359655
sp|Q7ZXL5|NELL2_XENLA 最大值										0.358722
sp|A1A4L8|MOCS3_BOVIN 最大值										0.358242
sp|A5GFZ6|MOCS3_PIG 最大值										0.358242
sp|Q3UYI5|RGL3_MOUSE 最大值										0.356841
sp|A4SYD7|DER_POLSQ 最大值										0.356828
sp|Q43785|GLNA3_MEDSA 最大值										0.356742
sp|Q00196|PO2F2_MOUSE 最大值										0.356371
sp|Q7N8V9|APAH_PHOLL 最大值										0.356364
sp|Q6AW69|CGNL1_MOUSE 最大值										0.355932
sp|Q58444|RPOB2_METJA 最大值										0.355422
sp|P40412|TCPE1_AVESA 最大值										0.35514
sp|Q54SF9|MHCKD_DICDI 最大值										0.354942
sp|Q9UMZ3|PTPRQ_HUMAN 最大值										0.354202
sp|P48200|IREB2_HUMAN 最大值										0.354102
sp|Q53770|TETM_STAAU 最大值										0.353678
sp|Q1MA74|PROA_RHIL3 最大值										0.35363
sp|P14403|POLG_JAEVN 最大值										0.353472
sp|Q12F40|PANB_POLSJ 最大值										0.353333
sp|O44578|HIUH2_CAEEL 最大值										0.352941
sp|Q9UTA1|YL8J_SCHPO 最大值										0.35249
sp|P21598|TET9_ENTFL 最大值										0.350548
sp|Q54807|TETM_STREE 最大值										0.350548
sp|O48963|PHOT1_ARATH 最大值										0.350402
sp|Q14134|TRI29_HUMAN 最大值										0.35034
sp|O75509|TNR21_HUMAN 最大值										0.349618
sp|B1P1D5|JZT4A_CHIJI 最大值										0.349206
sp|B1P1D6|JZT4B_CHIJI 最大值										0.349206
sp|A1TUZ5|DTD_ACIAC 最大值										0.348387
sp|Q60636|PRDM1_MOUSE 最大值										0.348131
sp|Q8K375|LRC56_MOUSE 最大值										0.346014
sp|Q1JU72|DEHA_BURSP 最大值										0.345395
sp|Q09847|NU146_SCHPO 最大值										0.344151
sp|Q9S735|PHT19_ARATH 最大值										0.343985
sp|P29294|MYLK_RABIT 最大值										0.343505
sp|B7LQ85|PSRP_ESCF3 最大值										0.34296
sp|Q6ZRI8|RHG36_HUMAN 最大值										0.341865
sp|O60218|AK1BA_HUMAN 最大值										0.341772
sp|P17140|CO4A2_CAEEL 最大值										0.340159
sp|Q5RK23|ABHD1_RAT 最大值										0.339806
sp|O94537|PPK4_SCHPO 最大值										0.338619
sp|Q16DB9|RNH2_ROSDO 最大值										0.338384
sp|P32361|IRE1_YEAST 最大值										0.338117
sp|Q5ZJ75|SL9A8_CHICK 最大值										0.337979
sp|A0RHV8|AMIF_BACAH 最大值										0.337349
sp|B7JK27|AMIF_BACC0 最大值										0.337349
sp|C3LI05|AMIF_BACAC 最大值										0.337349
sp|P59700|AMIF_BACAN 最大值										0.337349
sp|P59701|AMIF_BACCR 最大值										0.337349
sp|Q635Y7|AMIF_BACCZ 最大值										0.337349
sp|Q6HEM5|AMIF_BACHK 最大值										0.337349
sp|Q9FPS9|UBP15_ARATH 最大值										0.33658
sp|Q493E3|YGFZ_BLOPB 最大值										0.336364
sp|Q0BHN7|UREF_BURCM 最大值										0.336283
sp|P31063|YEDD_ECOLI 最大值										0.335766
sp|Q3KKY0|GPDA_CHLTA 最大值										0.335329
sp|A7N1X6|EFTS_VIBHB 最大值										0.33452
sp|Q99MN1|SYK_MOUSE 最大值										0.334454
sp|Q30KJ3|DB136_PANTR 最大值										0.333333
sp|Q30KP8|DB136_HUMAN 最大值										0.333333
sp|Q9QYI8|DNJB7_MOUSE 最大值										0.333333
sp|Q968X7|PNO_CRYPV 最大值										0.332989
sp|O15479|MAGB2_HUMAN 最大值										0.332288
sp|O30409|TYCC_BREPA 最大值										0.3321
sp|Q1LZ80|PAGR1_BOVIN 最大值										0.332016
sp|Q5M865|PAGR1_RAT 最大值										0.332016
sp|Q9C8J8|AB13G_ARATH 最大值										0.331858
sp|P30906|YCBL_BACUN 最大值										0.331288
sp|P83851|IUNH_LEIMA 最大值										0.33121
sp|A9MI64|RHAS_SALAR 最大值										0.330935
sp|Q9EP71|RAI14_MOUSE 最大值										0.329928
sp|Q4WT66|NRPS1_ASPFU 最大值										0.329718
sp|O35566|CD151_MOUSE 最大值										0.328063
sp|A6QHD6|NADD_STAAE 最大值										0.328042
sp|A8Z4D3|NADD_STAAT 最大值										0.328042
sp|Q2FXY3|NADD_STAA8 最大值										0.328042
sp|Q5HFG7|NADD_STAAC 最大值										0.328042
sp|Q64632|ITB4_RAT 最大值										0.327615
sp|O75147|OBSL1_HUMAN 最大值										0.327004
sp|O50055|COL1_ARATH 最大值										0.326761
sp|Q8UVQ4|KAISO_XENLA 最大值										0.323823
sp|Q6SVX2|TRS1_HCMVM 最大值										0.323604
sp|Q28165|PABP2_BOVIN 最大值										0.323529
sp|Q9HBG7|LY9_HUMAN 最大值										0.322137
sp|P34611|NCL1_CAEEL 最大值										0.321974
sp|Q9JMH9|MY18A_MOUSE 最大值										0.321951
sp|P40806|PKSJ_BACSU 最大值										0.321832
sp|Q9Z0G7|ZBT22_MOUSE 最大值										0.321317
sp|Q04726|TLE3_HUMAN 最大值										0.319948
sp|Q08122|TLE3_MOUSE 最大值										0.319948
sp|Q8LMR2|DCL1_ORYSJ 最大值										0.319703
sp|Q5T0T0|MARH8_HUMAN 最大值										0.319588
sp|O80560|IP5PC_ARATH 最大值										0.31954
sp|Q54QI4|HGD_DICDI 最大值										0.319444
sp|Q8CQV8|PDXT_STAES 最大值										0.318919
sp|A5WBQ1|RSMH_PSYWF 最大值										0.318584
sp|P20896|GLYC_HRSV1 最大值										0.318493
sp|Q8SSS9|QKGA_DICDI 最大值										0.31745
sp|Q8C102|GALT5_MOUSE 最大值										0.317204
sp|Q7Z5L3|C1QL2_HUMAN 最大值										0.317073
sp|Q41141|PFPB_RICCO 最大值										0.317029
sp|Q9HK21|SMC_THEAC 最大值										0.315789
sp|Q15052|ARHG6_HUMAN 最大值										0.315722
sp|Q8BW75|AOFB_MOUSE 最大值										0.315385
sp|A5WGF1|PYRH_PSYWF 最大值										0.315353
sp|P10619|PPGB_HUMAN 最大值										0.314583
sp|Q660S4|MURB_BORGA 最大值										0.313725
sp|Q01513|CYAA_PODAS 最大值										0.313287
sp|Q79666|POL_HV1MV 最大值										0.313278
sp|Q969R8|ITFG2_HUMAN 最大值										0.313199
sp|O17468|HIRA_DROME 最大值										0.312321
sp|Q69AY8|CCME_GLUDA 最大值										0.312139
sp|Q68FE8|Z280D_MOUSE 最大值										0.312115
sp|A6LLI7|KTHY_THEM4 最大值										0.311558
sp|O68008|BACC_BACLI 最大值										0.31137
sp|Q07563|COHA1_MOUSE 最大值										0.310884
sp|Q3AYV8|SASA_SYNS9 最大值										0.310705
sp|B5RL25|DDL_BORDL 最大值										0.31044
sp|A1WV00|PYRC_HALHL 最大值										0.310145
sp|Q9M9T4|PKS2_ARATH 最大值										0.309955
sp|Q9P7T1|SIB1_SCHPO 最大值										0.309504
sp|Q6DCN1|WIPI1_XENLA 最大值										0.309469
sp|A9HWM1|GLMU_BORPD 最大值										0.309211
sp|B8DR41|SAHH_DESVM 最大值										0.308977
sp|P24040|NIRS_PSEST 最大值										0.308929
sp|Q8R0J1|PKHG6_MOUSE 最大值										0.308767
sp|Q97CA8|AROD_THEVO 最大值										0.308696
sp|C4K8M3|TGT_HAMD5 最大值										0.308108
sp|Q66GS9|CP135_HUMAN 最大值										0.307895
sp|Q6FPF1|VPS10_CANGA 最大值										0.307794
sp|B4SR24|F16PA_STRM5 最大值										0.307692
sp|B8FNF7|Y4447_DESAA 最大值										0.307517
sp|Q5RBM8|RBM12_PONAB 最大值										0.306867
sp|O48809|LRX2_ARATH 最大值										0.306616
sp|Q6PB60|BHLH9_MOUSE 最大值										0.306122
sp|P75906|PGAB_ECOLI 最大值										0.30506
sp|Q8XAR3|PGAB_ECO57 最大值										0.30506
sp|P00646|CEA3_ECOLX 最大值										0.3049
sp|Q0S2E0|FPG_RHOSR 最大值										0.304795
sp|Q9C5N8|GDL20_ARATH 最大值										0.303763
sp|Q8RHF4|FTHS_FUSNN 最大值										0.303309
sp|O42469|TLE1_XENLA 最大值										0.302477
sp|Q8DKD7|QUEA_THEEB 最大值										0.30226
sp|Q61409|PDE3B_MOUSE 最大值										0.301818
sp|D4GUK1|RAD50_HALVD 最大值										0.301232
sp|Q5UR35|YR553_MIMIV 最大值										0.301158
sp|Q8BN78|KAISO_MOUSE 最大值										0.301043
sp|P35630|ADH1_ENTHI 最大值										0.3
sp|O79403|COX1_SCYCA 最大值										0.299807
sp|Q62656|PTPRZ_RAT 最大值										0.299655
sp|Q63085|PDE3B_RAT 最大值										0.299639
sp|B0RI49|RSMH_CLAMS 最大值										0.298742
sp|Q5RD32|GOPC_PONAB 最大值										0.298701
sp|A6VAK2|CMOB_PSEA7 最大值										0.298137
sp|A6VUA4|DEGPL_MARMS 最大值										0.296375
sp|P03186|DEN_EBVB9 最大值										0.296285
sp|Q1HVH9|DEN_EBVA8 最大值										0.296132
sp|O35657|NEUR1_MOUSE 最大值										0.295844
sp|Q99PW3|NEUR1_RAT 最大值										0.295844
sp|Q7MQ02|HSLO_VIBVY 最大值										0.295533
sp|Q8DDS7|HSLO_VIBVU 最大值										0.295533
sp|Q71HP2|BHLH9_RAT 最大值										0.294991
sp|Q7RTX9|MOT14_HUMAN 最大值										0.294118
sp|Q3KSU8|DEN_EBVG 最大值										0.294081
sp|Q04JI2|Y1396_STRP2 最大值										0.293919
sp|Q8DP10|Y1424_STRR6 最大值										0.293919
sp|Q8IU80|TMPS6_HUMAN 最大值										0.293465
sp|P16065|GCY_STRPU 最大值										0.293333
sp|P25242|POLG_SUMVS 最大值										0.293151
sp|A0A1F4|EYS_DROME 最大值										0.292411
sp|A1L1C7|PAN3_XENTR 最大值										0.292249
sp|Q9EPX2|PPN_MOUSE 最大值										0.292187
sp|Q3UZD5|PRDM6_MOUSE 最大值										0.291946
sp|A8FDD4|TRUB_BACP2 最大值										0.291262
sp|Q0V8T3|CTP5D_RAT 最大值										0.290421
sp|Q8K2W9|CN093_MOUSE 最大值										0.290203
sp|Q5H879|COMT_HORSE 最大值										0.289963
sp|P53594|MTKA_METEA 最大值										0.289744
sp|O25011|MSRAB_HELPY 最大值										0.289694
sp|Q6DCV1|AB1IP_XENLA 最大值										0.289433
sp|Q8R3Y8|I2BP1_MOUSE 最大值										0.289384
sp|Q8N2E6|TOR2X_HUMAN 最大值										0.289256
sp|P37392|TBB1_LUPAL 最大值										0.288591
sp|Q6PL45|BRID5_HUMAN 最大值										0.288462
sp|B1ICY6|Y1680_STRPI 最大值										0.287162
sp|B2IR84|Y1551_STRPS 最大值										0.287162
sp|B5E6K9|Y1492_STRP4 最大值										0.287162
sp|B8ZLS8|Y1583_STRPJ 最大值										0.287162
sp|C1CFE9|Y1472_STRZJ 最大值										0.287162
sp|C1CLR5|Y1589_STRZP 最大值										0.287162
sp|C1CSI6|Y1506_STRZT 最大值										0.287162
sp|Q97PN7|Y1566_STRPN 最大值										0.287162
sp|A8G3D1|MQO_PROM2 最大值										0.287149
sp|Q31CB9|MQO_PROM9 最大值										0.287149
sp|Q91365|QN1_COTCO 最大值										0.28697
sp|O34879|YKUO_BACSU 最大值										0.286195
sp|P46263|TBB1_SOLTU 最大值										0.286031
sp|A9N474|PDXB_SALPB 最大值										0.285714
sp|B4TBN9|PDXB_SALHS 最大值										0.285714
sp|B4TQA6|PDXB_SALSV 最大值										0.285714
sp|B5FPL4|PDXB_SALDC 最大值										0.285714
sp|B5R3Q1|PDXB_SALEP 最大值										0.285714
sp|B5RCJ5|PDXB_SALG2 最大值										0.285714
sp|Q57LY4|PDXB_SALCH 最大值										0.285714
sp|Q5PCV8|PDXB_SALPA 最大值										0.285714
sp|O17657|NH164_CAEEL 最大值										0.285347
sp|Q17R98|ZN827_HUMAN 最大值										0.284921
sp|Q5R565|RUN3A_PONAB 最大值										0.284753
sp|P38741|RIM4_YEAST 最大值										0.284712
sp|Q9BE73|ZN827_MACFA 最大值										0.283996
sp|Q6P1M9|ARMX5_HUMAN 最大值										0.283154
sp|B9KA88|META_THENN 最大值										0.282895
sp|O08856|ELL_MOUSE 最大值										0.282392
sp|C4ZBG8|FTHS_EUBR3 最大值										0.282374
sp|B0U5X3|EFG_XYLFM 最大值										0.28227
sp|O60774|FMO6_HUMAN 最大值										0.282004
sp|Q84JR9|TTL4_ARATH 最大值										0.281525
sp|Q5XG16|SLAIL_XENLA 最大值										0.281139
sp|O67883|THIL_AQUAE 最大值										0.281046
sp|Q04724|TLE1_HUMAN 最大值										0.280519
sp|Q62440|TLE1_MOUSE 最大值										0.280519
sp|O88532|ZFR_MOUSE 最大值										0.280261
sp|P09805|KTXA_KLULA 最大值										0.280105
sp|E1C1R4|UBP47_CHICK 最大值										0.28
sp|Q3V1M1|IGS10_MOUSE 最大值										0.27872
sp|B3PRZ5|PROA_RHIE6 最大值										0.278689
sp|Q21KS9|DER_SACD2 最大值										0.278132
sp|Q5ZLD7|VPS53_CHICK 最大值										0.277978
sp|Q1LLR6|IF2_RALME 最大值										0.277835
sp|A5GDX3|RECF_GEOUR 最大值										0.277473
sp|Q9JIR1|RIMB2_RAT 最大值										0.277407
sp|Q6WRH9|IGS10_RAT 最大值										0.277243
sp|P40995|SCD1_SCHPO 最大值										0.276376
sp|Q80UF7|TCAM1_MOUSE 最大值										0.275956
sp|Q8Z4Y8|FADL_SALTI 最大值										0.275862
sp|Q8ZNA5|FADL_SALTY 最大值										0.275862
sp|B2FLK4|GH109_STRMK 最大值										0.27533
sp|Q9H4B7|TBB1_HUMAN 最大值										0.274945
sp|A9ITX6|IF2_BORPD 最大值										0.27447
sp|Q6UDJ9|UL32_PSHV1 最大值										0.273463
sp|A2AIL4|NDUF6_MOUSE 最大值										0.273273
sp|Q01517|ALFC2_PEA 最大值										0.272206
sp|O88572|LRP6_MOUSE 最大值										0.272164
sp|P37297|STT4_YEAST 最大值										0.272105
sp|P59510|ATS20_HUMAN 最大值										0.271728
sp|Q6PDS3|SARM1_MOUSE 最大值										0.270718
sp|Q38864|EXPA5_ARATH 最大值										0.270588
sp|Q5PQA4|NB5R2_XENLA 最大值										0.27027
sp|Q9I3M9|CYCH_PSEAE 最大值										0.27027
sp|Q9CZ62|CEP97_MOUSE 最大值										0.26986
sp|Q0C3Z2|PDXH_HYPNA 最大值										0.269406
sp|Q6FWF3|BRE1_CANGA 最大值										0.268398
sp|O42287|ITSN1_XENLA 最大值										0.267717
sp|O60307|MAST3_HUMAN 最大值										0.26738
sp|B9JER3|PROA_AGRRK 最大值										0.266979
sp|Q47VL0|MDH_COLP3 最大值										0.266881
sp|Q92805|GOGA1_HUMAN 最大值										0.265971
sp|Q8L7E3|VSR7_ARATH 最大值										0.2656
sp|P09309|IE61_VZVD 最大值										0.265525
sp|Q61850|FOXC2_MOUSE 最大值										0.265182
sp|P23432|E13C_TOBAC 最大值										0.264957
sp|Q9QZS0|CO4A3_MOUSE 最大值										0.264829
sp|Q47KH4|PUR7_THEFY 最大值										0.263844
sp|Q5VWM1|PRA16_HUMAN 最大值										0.263713
sp|Q9R9J0|MYCB_BACIU 最大值										0.263364
sp|Q5UNW1|YR707_MIMIV 最大值										0.263345
sp|Q9FHS6|FK119_ARATH 最大值										0.263027
sp|Q60997|DMBT1_MOUSE 最大值										0.26283
sp|Q8VC66|ADIP_MOUSE 最大值										0.261789
sp|Q84J71|PP161_ARATH 最大值										0.261339
sp|Q9QZR9|CO4A4_MOUSE 最大值										0.260999
sp|Q2KIK0|SUGT1_BOVIN 最大值										0.260355
sp|B1X3Y1|ATPI_PAUCH 最大值										0.260331
sp|Q7TPW1|NEXN_MOUSE 最大值										0.260297
sp|P18987|HBB1_IGUIG 最大值										0.260274
sp|C6HSY8|ARGJ_AJECH 最大值										0.260042
sp|Q1AT39|FTHS3_RUBXD 最大值										0.260035
sp|O75503|CLN5_HUMAN 最大值										0.259777
sp|B3R6V8|MURC_CUPTR 最大值										0.259494
sp|Q9SJF0|BSL2_ARATH 最大值										0.259332
sp|Q755H7|HUT1_ASHGO 最大值										0.259259
sp|Q5HZI1|MTUS1_MOUSE 最大值										0.258678
sp|Q07499|NCAP_PEDV7 最大值										0.258503
sp|Q9Z0P5|TWF2_MOUSE 最大值										0.25788
sp|O42895|YBQ2_SCHPO 最大值										0.257709
sp|Q55EI8|Y9956_DICDI 最大值										0.25704
sp|Q9P7H1|FLP1_SCHPO 最大值										0.256983
sp|P41885|RBF1_CAEEL 最大值										0.256781
sp|Q1RGR1|CLPB_RICBR 最大值										0.25641
sp|O42649|SMC3_SCHPO 最大值										0.256281
sp|C0MAS4|MUTL_STRE4 最大值										0.256061
sp|A4TJL0|CUTC_YERPP 最大值										0.255906
sp|A7FID5|CUTC_YERP3 最大值										0.255906
sp|B2K314|CUTC_YERPB 最大值										0.255906
sp|Q1CJH5|CUTC_YERPN 最大值										0.255906
sp|Q6AGF6|DER_LEIXX 最大值										0.255717
sp|Q3IMN2|KAE1B_NATPD 最大值										0.255159
sp|Q552Z2|FNKE_DICDI 最大值										0.25511
sp|Q8BY87|UBP47_MOUSE 最大值										0.255087
sp|Q9W4T4|PDE4A_DROME 最大值										0.254756
sp|Q555D2|Y6503_DICDI 最大值										0.254486
sp|Q9SXA1|P4KA1_ARATH 最大值										0.254438
sp|P36001|FOLC_YEAST 最大值										0.253488
sp|Q9UN88|GBRT_HUMAN 最大值										0.253165
sp|Q8H0F2|ANGT_GENTR 最大值										0.253112
sp|Q6ZQ06|QN1_MOUSE 最大值										0.253029
sp|B1JLM0|CUTC_YERPY 最大值										0.251969
sp|B8GMI2|Y722_THISH 最大值										0.251748
sp|P53678|AP3M2_RAT 最大值										0.251196
sp|Q8R2R9|AP3M2_MOUSE 最大值										0.251196
sp|Q28CM8|ARFG2_XENTR 最大值										0.250951
sp|Q55DJ8|IRLC_DICDI 最大值										0.250693
sp|O54990|PROM1_MOUSE 最大值										0.250288
sp|A6KWL7|MIAA1_BACV8 最大值										0.25
sp|P30015|LHR_ECOLI 最大值										0.249675
sp|Q8W4S6|INV6_ARATH 最大值										0.249091
sp|Q0CL79|SEPH_ASPTN 最大值										0.248882
sp|O55156|CLIP2_RAT 最大值										0.248566
sp|P55359|NODD1_RHISN 最大值										0.248447
sp|Q92994|TF3B_HUMAN 最大值										0.248154
sp|Q5T1H1|EYS_HUMAN 最大值										0.248025
sp|Q493A2|LPXH_BLOPB 最大值										0.248
sp|Q8CGZ2|ADIP_RAT 最大值										0.247961
sp|Q70LM5|LGRC_BREPA 最大值										0.247937
sp|Q8NHQ1|CEP70_HUMAN 最大值										0.247906
sp|Q0JBZ6|MRS2C_ORYSJ 最大值										0.247664
sp|P59530|TA2R7_MOUSE 最大值										0.246795
sp|Q6PAJ1|BCR_MOUSE 最大值										0.246457
sp|Q91X21|K2013_MOUSE 最大值										0.246057
sp|Q9M8W5|SIP11_ARATH 最大值										0.245833
sp|A4VWI6|EZRA_STRSY 最大值										0.245645
sp|A4W2T8|EZRA_STRS2 最大值										0.245645
sp|Q99687|MEIS3_HUMAN 最大值										0.245333
sp|Q54CX4|Y5521_DICDI 最大值										0.24474
sp|B2VJ29|Y1554_ERWT9 最大值										0.244706
sp|Q9XSC1|SFRP5_BOVIN 最大值										0.244444
sp|P45456|ACEA1_SOYBN 最大值										0.243728
sp|A5D794|GAPD1_BOVIN 最大值										0.243454
sp|P42257|PILJ_PSEAE 最大值										0.243402
sp|P97368|MEIS3_MOUSE 最大值										0.243386
sp|Q9USR3|STT4_SCHPO 最大值										0.242941
sp|Q6FNC2|SLX9_CANGA 最大值										0.242857
sp|Q6UDM2|PRIM_PSHV1 最大值										0.242846
sp|Q7UWN8|AROB_RHOBA 最大值										0.242667
sp|Q5AZC8|ABNB_EMENI 最大值										0.2425
sp|Q4P555|PPIL2_USTMA 最大值										0.242268
sp|P74397|PRIA_SYNY3 最大值										0.241877
sp|Q11Q84|LIPA_CYTH3 最大值										0.241379
sp|Q0VF96|CGNL1_HUMAN 最大值										0.241167
sp|O74424|NU211_SCHPO 最大值										0.241154
sp|Q11HQ5|RL2_MESSB 最大值										0.241007
sp|Q31KM4|RF3_SYNE7 最大值										0.241007
sp|Q84135|MVP_ORSVS 最大值										0.240924
sp|Q96HR8|NAF1_HUMAN 最大值										0.240891
sp|Q1K4R6|ITPA_NEUCR 最大值										0.240838
sp|A2RV61|GAPD1_XENLA 最大值										0.240358
sp|Q9HH84|DPOL_THEG8 最大值										0.240141
sp|P32618|YEF3_YEAST 最大值										0.23954
sp|P16952|SSP5_STRGN 最大值										0.239333
sp|P32134|YIHM_ECOLI 最大值										0.239264
sp|A1RVX2|EF2_PYRIL 最大值										0.239189
sp|P38758|TDA3_YEAST 最大值										0.239006
sp|P18617|IBMP_CAMVP 最大值										0.238462
sp|Q8Z2W4|FIEF_SALTI 最大值										0.238255
sp|Q8CFX8|SYAC_MESAU 最大值										0.237603
sp|Q9CYK2|QPCT_MOUSE 最大值										0.237569
sp|Q5E1X4|HSLO_VIBF1 最大值										0.237113
sp|Q99572|P2RX7_HUMAN 最大值										0.236975
sp|P30317|DPOL_THELI 最大值										0.23678
sp|B5BJI1|FIEF_SALPK 最大值										0.236667
sp|B5F0P5|FIEF_SALA4 最大值										0.236667
sp|Q5PIR7|FIEF_SALPA 最大值										0.236667
sp|Q9C5P1|SUVH7_ARATH 最大值										0.236652
sp|P17398|HBSAG_HBVB1 最大值										0.236504
sp|P17399|HBSAG_HBVB4 最大值										0.236504
sp|Q8TCG1|CIP2A_HUMAN 最大值										0.236464
sp|Q9F1N8|RSMH_SHEVD 最大值										0.236422
sp|Q9C0Y5|PDR1_SCHPO 最大值										0.23639
sp|Q5EB81|NB5R1_RAT 最大值										0.236066
sp|Q60902|EP15R_MOUSE 最大值										0.235943
sp|Q90037|GLYC_SABVB 最大值										0.235656
sp|Q9Z2A9|GGT5_MOUSE 最大值										0.235602
sp|P02462|CO4A1_HUMAN 最大值										0.234871
sp|P08922|ROS1_HUMAN 最大值										0.234768
sp|Q2NHT0|SYD_METST 最大值										0.234624
sp|Q81021|VE2_HPV54 最大值										0.234332
sp|B1NWF3|NDHJ_MANES 最大值										0.234177
sp|Q8R4U0|STAB2_MOUSE 最大值										0.234076
sp|B7GG21|CYSH_ANOFW 最大值										0.234043
sp|P35400|GRM7_RAT 最大值										0.23388
sp|Q14831|GRM7_HUMAN 最大值										0.23388
sp|P11437|AVRA_PSESG 最大值										0.233738
sp|P85799|PROH2_APIME 最大值										0.233618
sp|Q6BIL4|ATG18_DEBHA 最大值										0.233096
sp|Q07179|NIFV_RHOCA 最大值										0.232984
sp|P0C338|NDHJ_ORYSA 最大值										0.232704
sp|P0C339|NDHJ_ORYSI 最大值										0.232704
sp|Q6ENH1|NDHJ_ORYNI 最大值										0.232704
sp|P02463|CO4A1_MOUSE 最大值										0.232475
sp|Q9LPG6|RHM2_ARATH 最大值										0.232384
sp|A2SST5|VATA_METLZ 最大值										0.232358
sp|A1ADA5|ARNB_ECOK1 最大值										0.23219
sp|B1X8W6|ARNB_ECODH 最大值										0.23219
sp|B7UFR5|ARNB_ECO27 最大值										0.23219
sp|C4ZU95|ARNB_ECOBW 最大值										0.23219
sp|P77690|ARNB_ECOLI 最大值										0.23219
sp|Q4WVN4|NRPS8_ASPFU 最大值										0.232061
sp|Q557G1|IRLB_DICDI 最大值										0.232044
sp|Q8TXG4|SYD_METKA 最大值										0.232019
sp|P06918|VL2_HPV05 最大值										0.23166
sp|P26540|VL2_HPV5B 最大值										0.23166
sp|P49440|CHSY_PHAVU 最大值										0.231362
sp|P51088|CHS6_TRISU 最大值										0.231362
sp|Q01286|CHS1_PEA 最大值										0.231362
sp|Q9ES67|ARHGB_RAT 最大值										0.231172
sp|Q6ZQA6|IGSF3_MOUSE 最大值										0.231156
sp|Q3SX40|PDLI7_BOVIN 最大值										0.231132
sp|P0C9L9|3601L_ASFK5 最大值										0.230769
sp|Q8VEI3|HYAL3_MOUSE 最大值										0.230583
sp|Q2FP52|VATA1_METHJ 最大值										0.230241
sp|Q75JP5|Y2471_DICDI 最大值										0.230106
sp|Q6CN76|GPI10_KLULA 最大值										0.229617
sp|A1BAM3|PROA_PARDP 最大值										0.229314
sp|O13024|INCEA_XENLA 最大值										0.229095
sp|P34576|MUA3_CAEEL 最大值										0.229095
sp|Q7Z4F1|LRP10_HUMAN 最大值										0.228612
sp|A6L8N5|ATPA_PARD8 最大值										0.228571
sp|P17927|CR1_HUMAN 最大值										0.228053
sp|O08788|DCTN1_MOUSE 最大值										0.227947
sp|Q1MN39|IF2_RHIL3 最大值										0.227917
sp|B2WBE8|LIPA_PYRTR 最大值										0.227818
sp|P50794|VL2_HPV20 最大值										0.227799
sp|P28023|DCTN1_RAT 最大值										0.227344
sp|B4U0Q8|GPDA_STREM 最大值										0.227139
sp|Q5T4F7|SFRP5_HUMAN 最大值										0.227129
sp|A6TFA0|ARNB_KLEP7 最大值										0.226913
sp|B4SU42|RSMH_SALNS 最大值										0.226837
sp|B4TJ79|RSMH_SALHS 最大值										0.226837
sp|B5F7V6|RSMH_SALA4 最大值										0.226837
sp|B5FI64|RSMH_SALDC 最大值										0.226837
sp|Q5PDH4|RSMH_SALPA 最大值										0.226837
sp|Q0SSI2|VATA_CLOPS 最大值										0.226734
sp|Q0TPW7|VATA_CLOP1 最大值										0.226734
sp|A3DIM9|ATPB_CLOTH 最大值										0.226293
sp|B5ZSI4|AROB_RHILW 最大值										0.226064
sp|Q8NI35|INADL_HUMAN 最大值										0.225986
sp|Q9P2E2|KIF17_HUMAN 最大值										0.225462
sp|Q80WK7|S29A3_RAT 最大值										0.225263
sp|Q8SSY6|SPKUL_DICDI 最大值										0.225225
sp|P49588|SYAC_HUMAN 最大值										0.225207
sp|Q86XX4|FRAS1_HUMAN 最大值										0.225106
sp|A1JRD5|PYRB_YERE8 最大值										0.22508
sp|Q8I1F0|G59B_DROER 最大值										0.224872
sp|Q63ZW7|INADL_MOUSE 最大值										0.2241
sp|Q6L0S6|DNAJ_PICTO 最大值										0.22409
sp|P25693|PCL2_YEAST 最大值										0.224026
sp|Q9UVF4|GPD1_YARLI 最大值										0.223618
sp|P52708|HNLS_SORBI 最大值										0.223529
sp|P08955|PYR1_MESAU 最大值										0.223371
sp|Q2NL14|KANL2_BOVIN 最大值										0.222707
sp|P68544|MCE_MYXVL 最大值										0.221893
sp|P68545|MCE_MYXVU 最大值										0.221893
sp|Q59332|PLD_CORUL 最大值										0.221498
sp|O80958|PP194_ARATH 最大值										0.221453
sp|A4XKA4|DNAK_CALS8 最大值										0.221122
sp|P0CD60|FRMC_DICDI 最大值										0.220954
sp|Q9CA54|PP122_ARATH 最大值										0.22084
sp|Q1I301|XERC_PSEE4 最大值										0.220736
sp|Q6GMG5|IMDH1_DANRE 最大值										0.220588
sp|Q640U0|ACBD5_XENTR 最大值										0.220524
sp|Q9RMZ0|Y6545_BACAN 最大值										0.220339
sp|Q61G93|ROL3_CAEBR 最大值										0.220172
sp|Q8GWT1|GAUTE_ARATH 最大值										0.219925
sp|P0CY20|HAL21_CANAL 最大值										0.21978
sp|Q8U297|ILVD_PYRFU 最大值										0.219601
sp|Q8CF89|TAB1_MOUSE 最大值										0.219124
sp|P25695|C42_NPVAC 最大值										0.218837
sp|B2UG82|GCSP_RALPJ 最大值										0.21859
sp|P06279|AMY_GEOSE 最大值										0.218579
sp|A3PL38|URE1_RHOS1 最大值										0.21831
sp|A4WR75|URE1_RHOS5 最大值										0.21831
sp|B9KK46|URE1_RHOSK 最大值										0.21831
sp|Q3J154|URE1_RHOS4 最大值										0.21831
sp|Q21FD0|NADD_SACD2 最大值										0.218182
sp|Q5ZMW3|API5_CHICK 最大值										0.217973
sp|P10894|PLCB1_BOVIN 最大值										0.217928
sp|Q9NQ66|PLCB1_HUMAN 最大值										0.217928
sp|Q28RJ3|URE1_JANSC 最大值										0.217926
sp|Q8XU98|GCSP_RALSO 最大值										0.217923
sp|Q9W6C8|NDF2_DANRE 最大值										0.217631
sp|Q9BZZ5|API5_HUMAN 最大值										0.217557
sp|Q133L6|URE1_RHOPS 最大值										0.217544
sp|Q873A1|SEC31_NEUCR 最大值										0.216561
sp|Q8ND23|LR16B_HUMAN 最大值										0.216472
sp|Q5XHY1|LR16B_RAT 最大值										0.216315
sp|A6ND36|FA83G_HUMAN 最大值										0.216282
sp|P82611|ACON_CANAL 最大值										0.216216
sp|Q8XJR1|DXR_CLOPE 最大值										0.216146
sp|Q3UFQ8|LR16B_MOUSE 最大值										0.216
sp|P27352|IF_HUMAN 最大值										0.215827
sp|Q9QXL1|KI21B_MOUSE 最大值										0.215827
sp|Q0CPK2|AGALA_ASPTN 最大值										0.215501
sp|Q80T14|FRAS1_MOUSE 最大值										0.215461
sp|Q9Q909|VH21_RFVKA 最大值										0.21519
sp|Q0SN63|SYD_BORAP 最大值										0.215017
sp|C5D7U6|MTNK_GEOSW 最大值										0.215
sp|Q7YU81|CHN_DROME 最大值										0.214992
sp|B1MD87|IF2_MYCA9 最大值										0.214912
sp|Q9SR00|PP213_ARATH 最大值										0.214286
sp|Q49SP3|TPSPS_POGCB 最大值										0.213768
sp|Q61493|DPOLZ_MOUSE 最大值										0.213325
sp|B4KBH3|MOC2B_DROMO 最大值										0.213115
sp|O06741|YITF_BACSU 最大值										0.212938
sp|Q02206|RSC4_YEAST 最大值										0.2128
sp|A9MQG1|PDXA_SALAR 最大值										0.212766
sp|B7MNR1|PDXA_ECO81 最大值										0.212766
sp|P58717|PDXA1_SALTY 最大值										0.212766
sp|P70628|IMPG2_RAT 最大值										0.212732
sp|O60161|UTP4_SCHPO 最大值										0.212676
sp|O51042|Y009_BORBU 最大值										0.212575
sp|P53541|SPO1_YEAST 最大值										0.212361
sp|E1B7Q7|TRIPC_BOVIN 最大值										0.211847
sp|Q14669|TRIPC_HUMAN 最大值										0.211847
sp|P37798|ACCC_PSEAE 最大值										0.211581
sp|A2AFR3|FRPD4_MOUSE 最大值										0.211364
sp|A1A8H0|ALLS_ECOK1 最大值										0.211039
sp|Q1RF30|ALLS_ECOUT 最大值										0.211039
sp|Q8FK66|ALLS_ECOL6 最大值										0.211039
sp|A0KRK0|SELU_SHESA 最大值										0.210959
sp|Q49420|CSD_MYCGE 最大值										0.210784
sp|P0DJD4|RBY1C_HUMAN 最大值										0.209677
sp|A4TNQ8|6PGL_YERPP 最大值										0.209581
sp|A7FKN1|6PGL_YERP3 最大值										0.209581
sp|B1JSS6|6PGL_YERPY 最大值										0.209581
sp|B2K8S8|6PGL_YERPB 最大值										0.209581
sp|Q1C949|6PGL_YERPA 最大值										0.209581
sp|Q1CFQ1|6PGL_YERPN 最大值										0.209581
sp|Q66D69|6PGL_YERPS 最大值										0.209581
sp|Q8ZGX4|6PGL_YERPE 最大值										0.209581
sp|Q8VCH6|DHC24_MOUSE 最大值										0.209302
sp|F1RCR6|TRIPC_DANRE 最大值										0.209279
sp|Q8C0X0|LCA5L_MOUSE 最大值										0.209177
sp|P76335|YEDS_ECOLI 最大值										0.209068
sp|F1LP64|TRIPC_RAT 最大值										0.208395
sp|B2JKT4|IF2_BURP8 最大值										0.20829
sp|Q4WI96|KU80_ASPFU 最大值										0.208276
sp|Q5XGY0|F83DA_XENLA 最大值										0.208185
sp|Q562A2|ZFR_RAT 最大值										0.207829
sp|A2C412|PNP_PROM1 最大值										0.207756
sp|Q38834|R13L4_ARATH 最大值										0.207746
sp|B5BP49|YP55_SCHPO 最大值										0.207547
sp|Q9BY84|DUS16_HUMAN 最大值										0.207519
sp|Q9P2F6|RHG20_HUMAN 最大值										0.207389
sp|C5C0G1|RPOA_BEUC1 最大值										0.207101
sp|Q12DM9|URED_POLSJ 最大值										0.206522
sp|P18084|ITB5_HUMAN 最大值										0.206508
sp|Q5DU05|CE164_MOUSE 最大值										0.206086
sp|Q6RI45|BRWD3_HUMAN 最大值										0.205882
sp|P22105|TENX_HUMAN 最大值										0.205875
sp|Q3TJZ6|FA98A_MOUSE 最大值										0.205825
sp|Q822N0|SYM_CHLCV 最大值										0.205455
sp|Q8S3J3|HIUH_SOYBN 最大值										0.205357
sp|Q86YF9|DZIP1_HUMAN 最大值										0.205306
sp|Q8NBF6|AVL9_HUMAN 最大值										0.205247
sp|Q5L5M3|SYM_CHLAB 最大值										0.205082
sp|Q8L5K4|GTPS_CITLI 最大值										0.205
sp|B3R1E4|IF2_CUPTR 最大值										0.204569
sp|B2GIP2|ARC_KOCRD 最大值										0.204545
sp|Q2KI56|CSN7B_BOVIN 最大值										0.204545
sp|Q9QWE9|GGT5_RAT 最大值										0.204545
sp|Q132P2|ACSF_RHOPS 最大值										0.20436
sp|B2UAA3|IF2_RALPJ 最大值										0.204357
sp|Q38732|DAG_ANTMA 最大值										0.204348
sp|Q09YM8|CTTB2_RABIT 最大值										0.203726
sp|D2GZV9|ENTP5_AILME 最大值										0.203233
sp|O00468|AGRIN_HUMAN 最大值										0.203193
sp|Q8WWQ8|STAB2_HUMAN 最大值										0.203058
sp|G5E8K5|ANK3_MOUSE 最大值										0.202958
sp|A0K6X5|IF2_BURCH 最大值										0.202884
sp|B1K0M0|IF2_BURCC 最大值										0.202884
sp|Q1BWS7|IF2_BURCA 最大值										0.202884
sp|B1YP36|IF2_BURA4 最大值										0.202675
sp|Q5URB2|YR188_MIMIV 最大值										0.202358
sp|A4JDX1|IF2_BURVG 最大值										0.202259
sp|O04705|GAO1D_WHEAT 最大值										0.202216
sp|A2S2L1|IF2_BURM9 最大值										0.202051
sp|A3N8V8|IF2_BURP6 最大值										0.202051
sp|A3NUL0|IF2_BURP0 最大值										0.202051
sp|Q3JSY9|IF2_BURP1 最大值										0.202051
sp|Q54NP8|KIF4_DICDI 最大值										0.201873
sp|Q2SVG8|IF2_BURTA 最大值										0.201844
sp|B4UIT6|PYRG_ANASK 最大值										0.201802
sp|Q7XPY7|BGL14_ORYSJ 最大值										0.20155
sp|O95398|RPGF3_HUMAN 最大值										0.201517
sp|G5E870|TRIPC_MOUSE 最大值										0.201481
sp|Q0VZ70|CHSAD_CHOCO 最大值										0.201431
sp|A7KAM8|ATG18_PENCW 最大值										0.201405
sp|Q0K6M5|MURC_CUPNH 最大值										0.201258
sp|P20795|VPS33_YEAST 最大值										0.201158
sp|B2T381|IF2_BURPP 最大值										0.200811
sp|Q86WJ1|CHD1L_HUMAN 最大值										0.200669
sp|Q6IBS0|TWF2_HUMAN 最大值										0.200573
sp|Q5T9S5|CCD18_HUMAN 最大值										0.200138
sp|A4QK70|NU4C_ARAHI 最大值										0.2
sp|Q9D0C4|TRM5_MOUSE 最大值										0.199601
sp|Q7MAC9|ARGJ_WOLSU 最大值										0.199495
sp|Q74ZH7|BEM3_ASHGO 最大值										0.199408
sp|A0PW60|GLMU_MYCUA 最大值										0.199187
sp|Q3J830|NUOC_NITOC 最大值										0.199134
sp|A7TPY4|ATG18_VANPO 最大值										0.198925
sp|Q3M4T0|TRPD_ANAVT 最大值										0.198895
sp|Q6MDI6|TILS_PARUW 最大值										0.19869
sp|Q3ZBM6|K1704_BOVIN 最大值										0.198556
sp|Q02425|MTLR_STRMU 最大值										0.198462
sp|B1MJT9|HOA2_MYCA9 最大值										0.198198
sp|Q7L5Y6|DET1_HUMAN 最大值										0.198182
sp|Q9D0A0|DET1_MOUSE 最大值										0.198182
sp|P27629|PABB_LACLL 最大值										0.197872
sp|Q8WXI4|ACO11_HUMAN 最大值										0.197694
sp|B4F6W9|TRIPC_XENTR 最大值										0.197471
sp|Q5R724|SP20H_PONAB 最大值										0.197318
sp|Q6K0P9|IFIX_HUMAN 最大值										0.197154
sp|Q5WU69|KUP3_LEGPL 最大值										0.197138
sp|Q9C501|PPR70_ARATH 最大值										0.197026
sp|B5VMS9|SDC25_YEAS6 最大值										0.196838
sp|Q61043|NIN_MOUSE 最大值										0.19656
sp|Q8UIV8|DAPB_AGRT5 最大值										0.196364
sp|Q6TXD4|DNMBP_MOUSE 最大值										0.196203
sp|P32873|BEM3_YEAST 最大值										0.195922
sp|Q8WTX9|ZDHC1_HUMAN 最大值										0.195876
sp|Q8RWZ7|VHAA1_ARATH 最大值										0.195838
sp|P72689|IF2_SYNY3 最大值										0.195804
sp|Q54XI9|Y0124_DICDI 最大值										0.195764
sp|B2A8E3|ARLY_NATTJ 最大值										0.195072
sp|Q5FWL4|EST2A_XENLA 最大值										0.194954
sp|Q8RC55|PUR9_THETN 最大值										0.194882
sp|Q15811|ITSN1_HUMAN 最大值										0.194654
sp|Q9S9N4|MRS21_ARATH 最大值										0.19457
sp|Q9P2E5|CHPF2_HUMAN 最大值										0.194301
sp|Q54PA4|EXPL2_DICDI 最大值										0.194103
sp|Q8SRK6|RAD50_ENCCU 最大值										0.194066
sp|Q5XGG5|CCNF_XENTR 最大值										0.193971
sp|Q5F489|TAF3_CHICK 最大值										0.193548
sp|P15924|DESP_HUMAN 最大值										0.193312
sp|Q6UXC1|AEGP_HUMAN 最大值										0.193257
sp|Q92E58|METX_LISIN 最大值										0.192935
sp|Q2T9P3|RGP1_BOVIN 最大值										0.192893
sp|B2I985|CYSG_XYLF2 最大值										0.192469
sp|Q7VIM8|MURA_HELHP 最大值										0.192399
sp|Q9JLB4|CUBN_MOUSE 最大值										0.192382
sp|Q7MNW1|LPOA_VIBVY 最大值										0.192371
sp|Q54WS5|ROCO6_DICDI 最大值										0.192361
sp|Q187T6|MUTS_CLOD6 最大值										0.192186
sp|B3PRG0|RNH2_RHIE6 最大值										0.19214
sp|Q96PZ7|CSMD1_HUMAN 最大值										0.191865
sp|A8FY01|MLTF_SHESH 最大值										0.191667
sp|Q8VHK2|CSKI1_RAT 最大值										0.190909
sp|Q9TU53|CUBN_CANFA 最大值										0.190884
sp|Q9FUJ1|CKX7_ARATH 最大值										0.19084
sp|Q559T8|Y0701_DICDI 最大值										0.190771
sp|A1ZB91|DAAF3_DROME 最大值										0.190741
sp|Q91VW5|GOGA4_MOUSE 最大值										0.190349
sp|P55199|ELL_HUMAN 最大值										0.190016
sp|Q0BTZ5|PYRB_GRABC 最大值										0.189873
sp|Q3LAC4|PREX2_MOUSE 最大值										0.189612
sp|Q51700|NIRS_PARDP 最大值										0.189597
sp|Q99P65|S29A3_MOUSE 最大值										0.189474
sp|Q0I9Y4|GLMU_SYNS3 最大值										0.189427
sp|A4J3A3|AROB_DESRM 最大值										0.189415
sp|Q9L4Q8|SYP_CLOSD 最大值										0.189189
sp|Q9CK66|SELA_PASMU 最大值										0.18913
sp|Q9W5U2|CHIT3_DROME 最大值										0.188976
sp|Q9D4C1|ILFT1_MOUSE 最大值										0.188862
sp|B4K4X6|SCC4_DROMO 最大值										0.1888
sp|B4S4I2|KDSB_PROA2 最大值										0.188755
sp|Q9WVG9|MS3L1_MOUSE 最大值										0.188571
sp|P33174|KIF4_MOUSE 最大值										0.188465
sp|A1L520|ARFG2_BOVIN 最大值										0.188462
sp|B3P0R4|SCC4_DROER 最大值										0.188291
sp|B4QZ45|SCC4_DROSI 最大值										0.188291
sp|Q9VFC0|SCC4_DROME 最大值										0.188291
sp|P23504|SPAP_STRMU 最大值										0.18822
sp|P30209|VP5_BTV2A 最大值										0.188213
sp|Q5RAT7|ARFG2_PONAB 最大值										0.1881
sp|Q8N6H7|ARFG2_HUMAN 最大值										0.1881
sp|A4IM52|RSGA_GEOTN 最大值										0.187713
sp|Q4ZTJ2|GLGB_PSEU2 最大值										0.187584
sp|P30203|CD6_HUMAN 最大值										0.187126
sp|P46644|AAT3_ARATH 最大值										0.187082
sp|Q21920|ANKHM_CAEEL 最大值										0.187023
sp|O70523|FXR1_CRIGR 最大值										0.186795
sp|P51114|FXR1_HUMAN 最大值										0.186795
sp|Q2TBT7|FXR1_BOVIN 最大值										0.186795
sp|Q872W1|ATG17_NEUCR 最大值										0.18662
sp|Q46WL2|HISX_CUPPJ 最大值										0.186517
sp|Q5QZ50|AROA_IDILO 最大值										0.18648
sp|Q6YPG5|NOS_ORYSJ 最大值										0.186472
sp|Q1JPJ2|XPP1_BOVIN 最大值										0.186196
sp|Q9LER0|PP381_ARATH 最大值										0.18617
sp|B9LR22|LIPA_HALLT 最大值										0.185897
sp|Q05793|PGBM_MOUSE 最大值										0.185865
sp|B1XVF7|F16PA_POLNS 最大值										0.185841
sp|Q92BV2|MUTL_LISIN 最大值										0.185738
sp|Q7H8L9|ATPB_IPOOB 最大值										0.185714
sp|A0JP70|WDR90_XENTR 最大值										0.185606
sp|Q3U132|TESP1_MOUSE 最大值										0.18559
sp|B4U2K7|AROC_STREM 最大值										0.185567
sp|Q9P353|MMM1_NEUCR 最大值										0.185542
sp|Q96DN6|MBD6_HUMAN 最大值										0.185444
sp|Q8LF20|CAP2_ARATH 最大值										0.185299
sp|Q5RCA2|MIO_PONAB 最大值										0.185143
sp|Q9NXC5|MIO_HUMAN 最大值										0.185143
sp|P03142|HBSAG_HBVA2 最大值										0.18509
sp|Q6IQY5|CEP70_MOUSE 最大值										0.185065
sp|P79122|PININ_BOVIN 最大值										0.184922
sp|Q0TPQ9|DXR_CLOP1 最大值										0.184896
sp|P0DF59|ADCA_STRPQ 最大值										0.184466
sp|Q5XD15|ADCA_STRP6 最大值										0.184466
sp|Q9SN21|Y3997_ARATH 最大值										0.184411
sp|Q9Y9I3|SYFB_AERPE 最大值										0.184307
sp|P17872|PME_ASPTU 最大值										0.18429
sp|Q7VKV0|RAPA_HAEDU 最大值										0.183967
sp|Q8NE01|CNNM3_HUMAN 最大值										0.183876
sp|P30217|VP7_ROTPC 最大值										0.183735
sp|Q11107|LIN13_CAEEL 最大值										0.183719
sp|Q8MLV1|LBR_DROME 最大值										0.183536
sp|B0B971|PNP_CHLT2 最大值										0.182734
sp|D2IGW7|1FEH_BROPI 最大值										0.182724
sp|Q6GQJ2|JADE1_XENLA 最大值										0.182588
sp|Q62865|PDE3A_RAT 最大值										0.182296
sp|Q923L3|CSMD1_MOUSE 最大值										0.182099
sp|O94429|RRF2M_SCHPO 最大值										0.182042
sp|Q08BS4|EZH2_DANRE 最大值										0.181579
sp|Q59LF9|AMPM2_CANAL 最大值										0.181208
sp|Q4WNA5|ATG5_ASPFU 最大值										0.180982
sp|Q6ZPG2|WDR90_MOUSE 最大值										0.180363
sp|Q6FF64|UVRC_ACIAD 最大值										0.180301
sp|O13639|SAHH_SCHPO 最大值										0.180139
sp|Q20911|CUBN_CAEEL 最大值										0.180133
sp|Q5JV73|FRPD3_HUMAN 最大值										0.18011
sp|Q8IWT3|CUL9_HUMAN 最大值										0.179976
sp|P40462|TM108_YEAST 最大值										0.179704
sp|Q92614|MY18A_HUMAN 最大值										0.179163
sp|P21263|NEST_RAT 最大值										0.179081
sp|P14133|ASO_CUCSA 最大值										0.178876
sp|Q04E78|RECA_OENOB 最大值										0.178191
sp|Q6P5H2|NEST_MOUSE 最大值										0.178112
sp|P25479|VPP_BPP2 最大值										0.177966
sp|Q6UDI1|UL17_PSHV1 最大值										0.177914
sp|Q9JIH7|WNK1_RAT 最大值										0.177799
sp|P12957|CALD1_CHICK 最大值										0.177691
sp|P30122|CEL_BOVIN 最大值										0.177554
sp|Q2UF60|SEC31_ASPOR 最大值										0.177533
sp|Q6CUV7|PRM1_KLULA 最大值										0.177294
sp|Q04215|YM13A_YEAST 最大值										0.177273
sp|Q9DBD0|ICA_MOUSE 最大值										0.177143
sp|Q68FW3|ST7L_RAT 最大值										0.177102
sp|Q8K4P7|ST7L_MOUSE 最大值										0.177102
sp|P53676|AP3M1_RAT 最大值										0.177033
sp|Q24K11|AP3M1_BOVIN 最大值										0.177033
sp|Q9Y2T2|AP3M1_HUMAN 最大值										0.177033
sp|Q39YM1|MURD_GEOMG 最大值										0.176991
sp|Q6IFT4|RHG20_MOUSE 最大值										0.176819
sp|O31782|PKSN_BACSU 最大值										0.176749
sp|P0CF19|YO162_YEAST 最大值										0.176744
sp|P04758|ACHB_BOVIN 最大值										0.176238
sp|Q6R8J2|HEG_DANRE 最大值										0.176049
sp|Q4PHA8|BRO1_USTMA 最大值										0.175651
sp|Q645V4|T2R30_PONPY 最大值										0.175549
sp|Q86Y13|DZIP3_HUMAN 最大值										0.175497
sp|Q9NYQ7|CELR3_HUMAN 最大值										0.175423
sp|Q9NX78|CN101_HUMAN 最大值										0.175389
sp|Q52KK4|NAF1_RAT 最大值										0.175055
sp|Q2M1P5|KIF7_HUMAN 最大值										0.174981
sp|Q9JLI4|NCOA6_RAT 最大值										0.174641
sp|Q96IY1|NSL1_HUMAN 最大值										0.174377
sp|Q2JIA6|MUTS_SYNJB 最大值										0.174208
sp|Q8K440|ABC8B_MOUSE 最大值										0.174074
sp|Q6UXI7|VITRN_HUMAN 最大值										0.174041
sp|B6H3H1|LAP1_PENCW 最大值										0.174026
sp|Q3AFV0|HFLX_CARHZ 最大值										0.173913
sp|Q9LNU6|PPR53_ARATH 最大值										0.173684
sp|O13729|PUN1_SCHPO 最大值										0.173611
sp|P39880|CUX1_HUMAN 最大值										0.173422
sp|Q2NRL1|DXR_SODGM 最大值										0.173367
sp|Q63638|SPEG_RAT 最大值										0.173366
sp|Q0CYG9|SEC31_ASPTN 最大值										0.173216
sp|Q8VEG0|CCD71_MOUSE 最大值										0.17321
sp|P46321|LICR_BACSU 最大值										0.173167
sp|Q3ZZD2|SYFB_DEHSC 最大值										0.173053
sp|Q3AGF7|PYRG_SYNSC 最大值										0.173042
sp|Q4UKP0|MURB_RICFE 最大值										0.172881
sp|D1ZEM2|KEX1_SORMK 最大值										0.172783
sp|Q24533|DICH_DROME 最大值										0.172775
sp|Q6P597|KLC3_HUMAN 最大值										0.172619
sp|B2IS10|MUTL_STRPS 最大值										0.172573
sp|B8ZKC9|MUTL_STRPJ 最大值										0.172573
sp|C1CBX8|MUTL_STRZJ 最大值										0.172573
sp|C1CI68|MUTL_STRZP 最大值										0.172573
sp|C1CP43|MUTL_STRZT 最大值										0.172573
sp|P0A3R1|HEXB_STRPN 最大值										0.172573
sp|P0A3R2|HEXB_STRR6 最大值										0.172573
sp|Q04MR4|MUTL_STRP2 最大值										0.172573
sp|Q18695|LMBD2_CAEEL 最大值										0.17236
sp|A4IRZ2|PCKA_GEOTN 最大值										0.172348
sp|A8M919|GSA_CALMQ 最大值										0.172093
sp|Q7Z2W4|ZCCHV_HUMAN 最大值										0.17184
sp|Q9KRQ4|Y1582_VIBCH 最大值										0.171694
sp|Q555Z5|ABCA4_DICDI 最大值										0.171517
sp|O14061|AST1_SCHPO 最大值										0.171484
sp|Q99K28|ARFG2_MOUSE 最大值										0.171154
sp|P53564|CUX1_MOUSE 最大值										0.170957
sp|Q4UK08|PBPA_RICFE 最大值										0.170886
sp|Q10955|RGS5_CAEEL 最大值										0.170732
sp|Q47U23|DNAA_THEFY 最大值										0.170732
sp|Q3JC90|PUR9_NITOC 最大值										0.170498
sp|A1JRM4|CMOB_YERE8 最大值										0.170279
sp|A1X283|SPD2B_HUMAN 最大值										0.170143
sp|Q5SQM0|EMAL6_MOUSE 最大值										0.170072
sp|Q6ZMW3|EMAL6_HUMAN 最大值										0.170072
sp|Q60J38|ANKHM_CAEBR 最大值										0.169954
sp|P06419|VL2_HPV08 最大值										0.169884
sp|Q8VEH8|ERLEC_MOUSE 最大值										0.169772
sp|Q96DZ1|ERLEC_HUMAN 最大值										0.169772
sp|Q9CDP0|YWFF_LACLA 最大值										0.169591
sp|C6C1F4|SAHH_DESAD 最大值										0.169492
sp|P98160|PGBM_HUMAN 最大值										0.168982
sp|Q96P48|ARAP1_HUMAN 最大值										0.168966
sp|O88466|ZN106_MOUSE 最大值										0.168962
sp|Q1CTG3|RSMH_HELPH 最大值										0.168831
sp|Q8K442|ABC8A_MOUSE 最大值										0.168519
sp|B5Z062|ARLY_ECO5E 最大值										0.16849
sp|Q8X730|ARLY_ECO57 最大值										0.16849
sp|P16694|YJDA_ECOLI 最大值										0.168464
sp|Q21J49|NHAB_SACD2 最大值										0.168337
sp|A4K2T1|KCNS1_MACMU 最大值										0.168242
sp|A4K2Y2|KCNS1_CHLAE 最大值										0.168242
sp|Q2QL82|CTTB2_MICMU 最大值										0.168185
sp|Q12663|SAHH_PNECA 最大值										0.168182
sp|Q9FPT5|UBP1_ARATH 最大值										0.168052
sp|B4GDX4|EIF3A_DROPE 最大值										0.167945
sp|Q5UQR0|DPOL_MIMIV 最大值										0.167816
sp|B0KTW7|Y1349_PSEPG 最大值										0.167742
sp|Q88M17|Y1758_PSEPK 最大值										0.167742
sp|Q0TUZ2|IOLD_CLOP1 最大值										0.167449
sp|Q2NAH8|SYP_ERYLH 最大值										0.167315
sp|O75445|USH2A_HUMAN 最大值										0.167243
sp|A5LFW4|EID3_MACFA 最大值										0.167116
sp|Q7V274|GLMU_PROMP 最大值										0.167038
sp|D1ZRF1|RTC5_SORMK 最大值										0.166954
sp|B6J7Z1|DDL_COXB1 最大值										0.166667
sp|Q06464|GPMI_ANTSP 最大值										0.166667
sp|Q8QZR4|OAF_MOUSE 最大值										0.166667
sp|Q8WZW7|RPC3_NEUCR 最大值										0.166667
sp|Q9RJ16|COBB_STRCO 最大值										0.166667
sp|Q9UPV0|CE164_HUMAN 最大值										0.166438
sp|Q4UJT0|PRIM_RICFE 最大值										0.166387
sp|P35442|TSP2_HUMAN 最大值										0.166382
sp|Q9JI18|LRP1B_MOUSE 最大值										0.166341
sp|A5FWR1|RBL_ACICJ 最大值										0.166329
sp|C3K059|Y4311_PSEFS 最大值										0.166134
sp|O70507|HCN4_MOUSE 最大值										0.166105
sp|Q57841|Y398_METJA 最大值										0.166052
sp|Q9H3U7|SMOC2_HUMAN 最大值										0.165919
sp|Q8BQM8|EMAL5_MOUSE 最大值										0.165908
sp|P26929|URE1_LACFE 最大值										0.165794
sp|Q5I6B8|PI51C_RAT 最大值										0.165698
sp|Q59263|RIBF_CORAM 最大值										0.16568
sp|B6IRV8|RNZ_RHOCS 最大值										0.165584
sp|Q3MID3|ARFG2_RAT 最大值										0.165385
sp|F4JCC1|PR35B_ARATH 最大值										0.165323
sp|P54972|CRTW_PARSN 最大值										0.165289
sp|A9IGY5|SAHH_BORPD 最大值										0.165254
sp|Q32NR9|FRITZ_XENLA 最大值										0.165254
sp|A8X811|WRM1_CAEBR 最大值										0.165207
sp|A6USJ5|SYL_METVS 最大值										0.164916
sp|A2RLU5|FOLD_LACLM 最大值										0.164912
sp|Q030A3|FOLD_LACLS 最大值										0.164912
sp|Q81162|HBSAG_HBVC8 最大值										0.164524
sp|Q7ZY79|API5B_XENLA 最大值										0.164436
sp|B3Q7D4|ACSF_RHOPT 最大值										0.164384
sp|Q6N9J7|ACSF_RHOPA 最大值										0.164384
sp|Q8R5A3|AB1IP_MOUSE 最大值										0.164179
sp|Q6DDM4|API5A_XENLA 最大值										0.164122
sp|Q6PFT9|AB1IP_DANRE 最大值										0.164087
sp|B7ZNG0|KIF7_MOUSE 最大值										0.163947
sp|Q9VZ08|RME6_DROME 最大值										0.163551
sp|P98164|LRP2_HUMAN 最大值										0.16348
sp|Q08518|UVRA_VITST 最大值										0.163445
sp|Q7RWT1|EIF3A_NEUCR 最大值										0.163362
sp|Q8GTB6|THCAS_CANSA 最大值										0.163303
sp|O59683|IF2M_SCHPO 最大值										0.163265
sp|Q7W1Z7|SAHH_BORPA 最大值										0.163136
sp|Q64512|PTN13_MOUSE 最大值										0.163066
sp|B4SYT3|NAPA_SALNS 最大值										0.163043
sp|B4TAT3|NAPA_SALHS 最大值										0.163043
sp|B4TPE6|NAPA_SALSV 最大值										0.163043
sp|B5EYU5|NAPA_SALA4 最大值										0.163043
sp|B5FNQ2|NAPA_SALDC 最大值										0.163043
sp|B5R233|NAPA_SALEP 最大值										0.163043
sp|C0Q0P2|NAPA_SALPC 最大值										0.163043
sp|Q57M92|NAPA_SALCH 最大值										0.163043
sp|Q5PI61|NAPA_SALPA 最大值										0.163043
sp|Q8Z570|NAPA_SALTI 最大值										0.163043
sp|P14623|FUS_NDVI 最大值										0.162749
sp|A2ARV4|LRP2_MOUSE 最大值										0.162446
sp|P98158|LRP2_RAT 最大值										0.162446
sp|Q75E41|BRE4_ASHGO 最大值										0.162393
sp|Q6XZF7|DNMBP_HUMAN 最大值										0.162334
sp|Q99L02|PAGR1_MOUSE 最大值										0.162055
sp|P63128|POK4_HUMAN 最大值										0.162041
sp|P17397|HBSAG_HBVB2 最大值										0.161954
sp|P53352|INCE_CHICK 最大值										0.161916
sp|Q2QI47|USH2A_MOUSE 最大值										0.161756
sp|Q0VBN2|DSEL_MOUSE 最大值										0.161558
sp|Q5E9N9|APEX2_BOVIN 最大值										0.161479
sp|Q5SQS8|CJ120_HUMAN 最大值										0.161194
sp|P33615|FUS_NDVQ 最大值										0.16094
sp|Q11Q45|SYP_CYTH3 最大值										0.160896
sp|B0XQZ0|SEY1_ASPFC 最大值										0.16088
sp|Q9C099|LRCC1_HUMAN 最大值										0.160853
sp|Q06696|VPS36_YEAST 最大值										0.160777
sp|O57683|SF3B1_XENLA 最大值										0.160673
sp|A4GYS0|ACCD_POPTR 最大值										0.160643
sp|Q14FE8|ACCD_POPAL 最大值										0.160643
sp|Q3M8T9|LEU3_ANAVT 最大值										0.160221
sp|Q8YXA2|LEU3_NOSS1 最大值										0.160221
sp|Q5RBW9|TTC27_PONAB 最大值										0.160142
sp|P38229|GIP1_YEAST 最大值										0.159624
sp|Q7V1J8|SYFB_PROMP 最大值										0.159562
sp|Q5KV31|SECA2_GEOKA 最大值										0.159348
sp|Q4J8J7|SYL2_SULAC 最大值										0.159236
sp|Q29HW3|RME6_DROPS 最大值										0.158963
sp|A8G3Q9|CHLB_PROM2 最大值										0.1587
sp|P0DJQ9|TIKI2_XENTR 最大值										0.1587
sp|Q4R6F2|CF070_MACFA 最大值										0.158683
sp|A2CG49|KALRN_MOUSE 最大值										0.15857
sp|Q5UQT5|YR345_MIMIV 最大值										0.158537
sp|P12263|FA8_PIG 最大值										0.158462
sp|Q8CH25|SLTM_MOUSE 最大值										0.158099
sp|A2BJX6|DNLI_HYPBU 最大值										0.157895
sp|O22784|CRR11_ARATH 最大值										0.157895
sp|Q555L9|TAF12_DICDI 最大值										0.157895
sp|Q69ZB0|LRCC1_MOUSE 最大值										0.157895
sp|P25940|CO5A3_HUMAN 最大值										0.157593
sp|Q05004|NXPE1_RABIT 最大值										0.157407
sp|Q8MVR1|GBPC_DICDI 最大值										0.157355
sp|Q5JNA1|Y1237_ORYSJ 最大值										0.157163
sp|P04485|ICP22_HHV11 最大值										0.157143
sp|Q9RUA9|LEU1_DEIRA 最大值										0.157088
sp|Q15910|EZH2_HUMAN 最大值										0.156836
sp|Q4R381|EZH2_MACFA 最大值										0.156836
sp|Q61188|EZH2_MOUSE 最大值										0.156836
sp|Q86YC2|PALB2_HUMAN 最大值										0.15683
sp|Q01YD9|GLMU_SOLUE 最大值										0.156652
sp|Q07KK8|RPOC_RHOP5 最大值										0.156429
sp|Q04833|LRP_CAEEL 最大值										0.156322
sp|Q297V5|SETD8_DROPS 最大值										0.156295
sp|A5G276|FTHS_ACICJ 最大值										0.156194
sp|Q6YUB8|BRXL1_ORYSJ 最大值										0.156171
sp|Q46JB7|RNZ_PROMT 最大值										0.156051
sp|A8F956|DISA_BACP2 最大值										0.155989
sp|Q49398|GLF_MYCGE 最大值										0.155941
sp|O77416|ASP1_ANISI 最大值										0.155844
sp|O00295|TULP2_HUMAN 最大值										0.155769
sp|Q8U0S7|FTSZ3_PYRFU 最大值										0.155738
sp|Q642G2|SOSD1_RAT 最大值										0.15534
sp|Q9CQN4|SOSD1_MOUSE 最大值										0.15534
sp|P13625|FUS_NPVOP 最大值										0.155206
sp|A2AJ76|HMCN2_MOUSE 最大值										0.155098
sp|Q9ZCE9|PBPA_RICPR 最大值										0.155019
sp|A5F7H8|MUKB_VIBC3 最大值										0.15493
sp|Q9Z1M0|P2RX7_MOUSE 最大值										0.154622
sp|Q54EW0|FRMA_DICDI 最大值										0.154246
sp|Q8TYY9|SYG_METKA 最大值										0.154116
sp|A5CXJ7|TIG_VESOH 最大值										0.153846
sp|P24822|PPBI_MOUSE 最大值										0.153846
sp|Q8NDA2|HMCN2_HUMAN 最大值										0.153603
sp|P48590|FTZ_DROHY 最大值										0.153509
sp|B3DLH6|MYOF_XENTR 最大值										0.153447
sp|Q7TNT2|FACR2_MOUSE 最大值										0.153398
sp|Q3AVF3|GLMU_SYNS9 最大值										0.153333
sp|Q6K9G1|AMT12_ORYSJ 最大值										0.153226
sp|Q00657|CSPG4_RAT 最大值										0.153052
sp|Q7Z4L5|TT21B_HUMAN 最大值										0.152736
sp|Q55F68|CYAD_DICDI 最大值										0.152614
sp|A0B8B0|PYRH_METTP 最大值										0.152466
sp|Q6G2Q3|MURD_BARHE 最大值										0.152361
sp|Q836V1|SYI_ENTFA 最大值										0.152268
sp|P44700|Y419_HAEIN 最大值										0.152174
sp|Q62774|MYO1A_RAT 最大值										0.152019
sp|A2QCV0|ATG17_ASPNC 最大值										0.152015
sp|Q5DRC4|PCDB9_PANTR 最大值										0.151819
sp|Q5GSH5|SYFB_WOLTR 最大值										0.151515
sp|Q9FT69|RQSIM_ARATH 最大值										0.151515
sp|Q95Q98|JHD1_CAEEL 最大值										0.151487
sp|Q9Z2J4|NEXN_RAT 最大值										0.150915
sp|Q7VLW2|UVRA_HAEDU 最大值										0.150743
sp|P04254|HCYA_PANIN 最大值										0.150685
sp|Q45716|CR1JB_BACTU 最大值										0.150427
sp|Q9ZEA9|CLPB_RICPR 最大值										0.15035
sp|O92530|POLG_HCVVN 最大值										0.150348
sp|Q9UJH8|METRN_HUMAN 最大值										0.150171
sp|Q3V4U6|Y1940_ATV 最大值										0.15
sp|Q8H0T4|UPL2_ARATH 最大值										0.149535
sp|P12259|FA5_HUMAN 最大值										0.149281
sp|P09732|POLG_STEVM 最大值										0.148886
sp|Q80U19|DAAM2_MOUSE 最大值										0.148879
sp|A9IYX0|ATPA_BART1 最大值										0.148728
sp|Q6FYM1|ATPA_BARQU 最大值										0.148728
sp|A2ASQ1|AGRIN_MOUSE 最大值										0.148718
sp|P47480|TIG_MYCGE 最大值										0.148649
sp|Q23551|UNC22_CAEEL 最大值										0.148645
sp|Q3MHC2|INT11_RAT 最大值										0.148333
sp|P19110|POLG_JAEV5 最大值										0.14831
sp|P27395|POLG_JAEV1 最大值										0.14831
sp|P32886|POLG_JAEVJ 最大值										0.14831
sp|Q53GL7|PAR10_HUMAN 最大值										0.148293
sp|Q604V6|FTSW_METCA 最大值										0.148241
sp|O78439|YCF46_GUITH 最大值										0.148221
sp|Q8BD28|NCAP_CPXVB 最大值										0.148214
sp|P29837|POLG_LANVT 最大值										0.148213
sp|Q9H2Y7|ZN106_HUMAN 最大值										0.148168
sp|Q8Y788|MUTL_LISMO 最大值										0.148087
sp|Q6PCR6|ZFR_DANRE 最大值										0.148045
sp|P07720|POLG_TBEVS 最大值										0.148007
sp|P14336|POLG_TBEVW 最大值										0.14792
sp|P22338|POLG_LIV 最大值										0.14792
sp|Q3SVI0|PROA_NITWN 最大值										0.147887
sp|Q04538|POLG_POWVL 最大值										0.147877
sp|A5DXA0|NST1_LODEL 最大值										0.147831
sp|O77086|C3G_DROME 最大值										0.147677
sp|Q4LDE5|SVEP1_HUMAN 最大值										0.147578
sp|Q2RV06|PROA_RHORT 最大值										0.147541
sp|P29990|POLG_DEN26 最大值										0.147154
sp|Q6HCP7|ASSY_BACHK 最大值										0.147132
sp|A5IG23|KMO_LEGPC 最大值										0.146993
sp|A5IMS4|METE_THEP1 最大值										0.146939
sp|Q6K223|ARFH_ORYSJ 最大值										0.146843
sp|P41515|TOP2A_CRIGR 最大值										0.146789
sp|Q9FNI6|SM3L2_ARATH 最大值										0.146744
sp|Q21ZA6|ATPB2_RHOFD 最大值										0.146718
sp|Q6S6W0|GP2_EHV1V 最大值										0.146651
sp|Q6YMS4|POLG_DEN3S 最大值										0.146608
sp|Q54TN2|MYBC_DICDI 最大值										0.146552
sp|A7ZVX9|DAPB_ECOHS 最大值										0.14652
sp|B6HYX9|DAPB_ECOSE 最大值										0.14652
sp|B7L4F3|DAPB_ECO55 最大值										0.14652
sp|P14335|POLG_KUNJM 最大值										0.146519
sp|Q1QQT7|PROA_NITHX 最大值										0.146512
sp|Q0VRK1|SYD_ALCBS 最大值										0.146508
sp|Q12386|ARP8_YEAST 最大值										0.146425
sp|P50245|SAHH2_DROME 最大值										0.146341
sp|Q6C6M0|ATG2_YARLI 最大值										0.14623
sp|P0CR73|SPT6_CRYNB 最大值										0.146082
sp|Q8IWJ2|GCC2_HUMAN 最大值										0.146081
sp|Q6K8Z4|FH7_ORYSJ 最大值										0.145848
sp|A9I714|HGD_BORPD 最大值										0.145833
sp|B1Y963|SYP_PYRNV 最大值										0.145791
sp|Q6A026|PDS5A_MOUSE 最大值										0.145646
sp|A4L9P7|PDS5A_RAT 最大值										0.145536
sp|Q6BV76|ATM_DEBHA 最大值										0.145522
sp|P27138|TFDB_CUPPJ 最大值										0.145485
sp|Q6TLH3|CUED2_DANRE 最大值										0.14539
sp|Q62036|AZI1_MOUSE 最大值										0.145283
sp|Q8MIU0|TYRO_BOVIN 最大值										0.145283
sp|Q29RF7|PDS5A_HUMAN 最大值										0.145101
sp|Q06194|FA8_MOUSE 最大值										0.14489
sp|P50827|VL2_HPV36 最大值										0.144788
sp|Q8T6J1|ABCA6_DICDI 最大值										0.144697
sp|Q252Z7|HEMH_CHLFF 最大值										0.144654
sp|Q8R0N9|ZDHC1_MOUSE 最大值										0.144628
sp|Q5U231|ZFR_XENTR 最大值										0.144601
sp|P03314|POLG_YEFV1 最大值										0.144532
sp|Q6DV88|POLG_YEFVA 最大值										0.144532
sp|Q6J3P1|POLG_YEFVC 最大值										0.144532
sp|Q89277|POLG_YEFVF 最大值										0.144532
sp|Q98803|POLG_YEFVI 最大值										0.144532
sp|Q9YRV3|POLG_YEFVT 最大值										0.144532
sp|Q074N0|POLG_YEFVE 最大值										0.14449
sp|Q1X880|POLG_YEFVU 最大值										0.14449
sp|Q1X881|POLG_YEFVN 最大值										0.14449
sp|B9WJJ7|KEX1_CANDC 最大值										0.144315
sp|A8LKX1|META_DINSH 最大值										0.144262
sp|Q9NZM1|MYOF_HUMAN 最大值										0.144105
sp|P38630|RFC1_YEAST 最大值										0.144019
sp|Q9R097|SPIT1_MOUSE 最大值										0.143984
sp|Q0AFT2|MURA_NITEC 最大值										0.143885
sp|Q6YRM6|Y8219_ORYSJ 最大值										0.143836
sp|A2AVA0|SVEP1_MOUSE 最大值										0.143818
[truncated: 1,686 more rows]
